# Supplementary material for: Australian Utility Weights for the EORTC QLU-C10D, a Multi-Attribute Utility Instrument Derived from the Cancer-Specific Quality of Life Questionnaire, EORTC QLQ-C30
Source: Springer Nature journal article supplement (doi:10.1007/s40273-017-0582-5), 2017-12-21
Supplement: MOESM1 [file 24130396]

**Australian utility weights for the EORTC QLU-C10D, a multi-attribute utility instrument derived from the cancer-specific quality of life questionnaire, EORTC QLQ-C30**

***Pharmacoeconomics***

\*Madeleine T King, Rosalie Viney, A. Simon Pickard, Donna Rowen, Neil K Aaronson, John E Brazier, David F Cella, Daniel SJ Costa, Peter M Fayers, Georg Kemmler, Helen McTaggart-Cowen, Rebecca Mercieca-Bebber, Stuart Peacock, Deborah Street, Tracey A Young, Richard Norman, on behalf of the MAUCa Consortium.

\*corresponding author

Prof Madeleine T King<sup>1,2</sup>

[Madeleine.king@sydney.edu.au](mailto:Madeleine.king@sydney.edu.au)

1. Psycho-oncology Co-operative Research Group, School of Psychology, Faculty of Science, University of Sydney, NSW, Australia
2. Central Clinical School, Sydney Medical School, Faculty of Medicine, University of Sydney, Sydney, NSW, Australia

Online Resource 1

Appendix 1 – DCE Design matrix

| Row | PF | EF | SF | RF | PA | FA | TS | AP | NA | BO | LE | PF | EF | SF | RF | PA | FA | TS | AP | NA | BO | LE | Obs | Prob(Pick A) |      |
|-----|----|----|----|----|----|----|----|----|----|----|----|----|----|----|----|----|----|----|----|----|----|----|-----|--------------|------|
| 1   | 2  | 4  | 2  | 4  | 1  | 1  | 1  | 4  | 3  | 3  | 2  | 1  | 1  | 1  | 1  | 1  | 1  | 1  | 4  | 3  | 3  | 1  | 16  | 0.69         |      |
| 2   | 2  | 1  | 3  | 1  | 1  | 1  | 2  | 4  | 2  | 2  | 2  | 1  | 2  | 2  | 2  | 1  | 1  | 2  | 4  | 2  | 2  | 1  | 17  | 0.71         |      |
| 3   | 2  | 2  | 4  | 2  | 1  | 1  | 3  | 3  | 2  | 4  | 2  | 1  | 3  | 3  | 3  | 1  | 1  | 3  | 3  | 2  | 4  | 1  | 17  | 0.71         |      |
| 4   | 2  | 3  | 1  | 3  | 1  | 1  | 4  | 3  | 3  | 1  | 2  | 1  | 4  | 4  | 4  | 1  | 1  | 4  | 3  | 3  | 1  | 1  | 18  | 0.89         |      |
| 5   | 2  | 1  | 2  | 3  | 1  | 2  | 1  | 1  | 3  | 1  | 1  | 3  | 4  | 3  | 2  | 1  | 2  | 1  | 1  | 3  | 1  | 1  | 2   | 17           | 0.47 |
| 6   | 2  | 2  | 1  | 4  | 1  | 2  | 2  | 1  | 2  | 4  | 1  | 3  | 1  | 2  | 3  | 1  | 2  | 2  | 1  | 2  | 4  | 2  | 17  | 0.47         |      |
| 7   | 3  | 2  | 1  | 4  | 1  | 2  | 3  | 2  | 2  | 2  | 2  | 2  | 3  | 4  | 1  | 1  | 2  | 3  | 2  | 2  | 2  | 1  | 17  | 0.71         |      |
| 8   | 2  | 4  | 3  | 2  | 1  | 2  | 4  | 2  | 3  | 3  | 1  | 3  | 3  | 4  | 1  | 1  | 2  | 4  | 2  | 3  | 3  | 2  | 17  | 0.18         |      |
| 9   | 4  | 4  | 4  | 3  | 1  | 3  | 1  | 4  | 4  | 2  | 2  | 3  | 1  | 3  | 4  | 1  | 3  | 1  | 4  | 4  | 2  | 1  | 18  | 0.61         |      |
| 10  | 4  | 1  | 1  | 2  | 1  | 3  | 2  | 4  | 1  | 3  | 2  | 3  | 2  | 4  | 3  | 1  | 3  | 2  | 4  | 1  | 3  | 1  | 18  | 0.78         |      |
| 11  | 3  | 3  | 1  | 2  | 1  | 3  | 3  | 3  | 1  | 1  | 1  | 4  | 2  | 2  | 1  | 1  | 3  | 3  | 3  | 1  | 1  | 2  | 16  | 0.19         |      |
| 12  | 4  | 3  | 3  | 4  | 1  | 3  | 4  | 3  | 4  | 4  | 2  | 3  | 4  | 2  | 1  | 1  | 3  | 4  | 3  | 4  | 4  | 1  | 17  | 0.53         |      |
| 13  | 1  | 4  | 1  | 1  | 1  | 4  | 1  | 1  | 4  | 4  | 2  | 4  | 1  | 4  | 2  | 1  | 4  | 1  | 1  | 4  | 4  | 1  | 17  | 0.88         |      |
| 14  | 1  | 1  | 4  | 4  | 1  | 4  | 2  | 1  | 1  | 1  | 2  | 4  | 2  | 3  | 1  | 1  | 4  | 2  | 1  | 1  | 1  | 1  | 17  | 0.65         |      |
| 15  | 4  | 3  | 2  | 4  | 1  | 4  | 3  | 2  | 1  | 3  | 1  | 1  | 2  | 3  | 3  | 1  | 4  | 3  | 2  | 1  | 3  | 2  | 16  | 0.13         |      |
| 16  | 4  | 4  | 1  | 3  | 1  | 4  | 4  | 2  | 4  | 2  | 1  | 1  | 3  | 2  | 2  | 1  | 4  | 4  | 2  | 4  | 2  | 2  | 17  | 0.12         |      |
| 17  | 1  | 1  | 1  | 1  | 2  | 1  | 1  | 4  | 1  | 2  | 2  | 2  | 4  | 2  | 4  | 2  | 1  | 1  | 4  | 1  | 2  | 3  | 17  | 0.71         |      |
| 18  | 2  | 1  | 3  | 1  | 2  | 1  | 2  | 4  | 4  | 3  | 3  | 1  | 2  | 2  | 2  | 2  | 1  | 2  | 4  | 4  | 3  | 2  | 15  | 0.80         |      |
| 19  | 1  | 3  | 3  | 3  | 2  | 1  | 3  | 3  | 4  | 1  | 2  | 2  | 2  | 4  | 2  | 2  | 1  | 3  | 3  | 4  | 1  | 3  | 17  | 0.18         |      |
| 20  | 2  | 3  | 1  | 3  | 2  | 1  | 4  | 3  | 1  | 4  | 3  | 1  | 4  | 4  | 4  | 2  | 1  | 4  | 3  | 1  | 4  | 2  | 18  | 0.89         |      |
| 21  | 2  | 1  | 2  | 3  | 2  | 2  | 1  | 1  | 1  | 4  | 2  | 3  | 4  | 3  | 2  | 2  | 2  | 1  | 1  | 1  | 4  | 3  | 17  | 0.12         |      |
| 22  | 2  | 2  | 1  | 4  | 2  | 2  | 2  | 1  | 4  | 1  | 2  | 3  | 1  | 2  | 3  | 2  | 2  | 2  | 1  | 4  | 1  | 3  | 18  | 0.17         |      |
| 23  | 3  | 2  | 1  | 4  | 2  | 2  | 3  | 2  | 4  | 3  | 3  | 2  | 3  | 4  | 1  | 2  | 2  | 3  | 2  | 4  | 3  | 2  | 18  | 0.83         |      |
| 24  | 3  | 3  | 4  | 1  | 2  | 2  | 4  | 2  | 1  | 2  | 3  | 2  | 4  | 3  | 2  | 2  | 2  | 4  | 2  | 1  | 2  | 2  | 17  | 0.76         |      |
| 25  | 3  | 1  | 3  | 4  | 2  | 3  | 1  | 4  | 2  | 3  | 2  | 4  | 4  | 4  | 3  | 2  | 3  | 1  | 4  | 2  | 3  | 3  | 18  | 0.39         |      |
| 26  | 4  | 1  | 1  | 2  | 2  | 3  | 2  | 4  | 3  | 2  | 3  | 3  | 2  | 4  | 3  | 2  | 3  | 2  | 4  | 3  | 2  | 2  | 17  | 0.82         |      |
| 27  | 3  | 3  | 1  | 2  | 2  | 3  | 3  | 3  | 3  | 4  | 2  | 4  | 2  | 2  | 1  | 2  | 3  | 3  | 3  | 3  | 4  | 3  | 18  | 0.28         |      |

|    |   |   |   |   |   |   |   |   |   |   |   |   |   |   |   |   |   |   |   |   |   |   |    |      |
|----|---|---|---|---|---|---|---|---|---|---|---|---|---|---|---|---|---|---|---|---|---|---|----|------|
| 28 | 3 | 4 | 2 | 1 | 2 | 3 | 4 | 3 | 2 | 1 | 2 | 4 | 3 | 3 | 4 | 2 | 3 | 4 | 3 | 2 | 1 | 3 | 18 | 0.56 |
| 29 | 4 | 1 | 4 | 2 | 2 | 4 | 1 | 1 | 2 | 1 | 2 | 1 | 4 | 1 | 1 | 2 | 4 | 1 | 1 | 2 | 1 | 3 | 18 | 0.06 |
| 30 | 4 | 2 | 3 | 1 | 2 | 4 | 2 | 1 | 3 | 4 | 2 | 1 | 1 | 4 | 4 | 2 | 4 | 2 | 1 | 3 | 4 | 3 | 15 | 0.13 |
| 31 | 4 | 3 | 2 | 4 | 2 | 4 | 3 | 2 | 3 | 2 | 2 | 1 | 2 | 3 | 3 | 2 | 4 | 3 | 2 | 3 | 2 | 3 | 17 | 0.24 |
| 32 | 4 | 4 | 1 | 3 | 2 | 4 | 4 | 2 | 2 | 3 | 2 | 1 | 3 | 2 | 2 | 2 | 4 | 4 | 2 | 2 | 3 | 3 | 18 | 0.06 |
| 33 | 1 | 1 | 1 | 1 | 3 | 1 | 1 | 2 | 1 | 4 | 3 | 2 | 4 | 2 | 4 | 3 | 1 | 1 | 2 | 1 | 4 | 4 | 17 | 0.65 |
| 34 | 1 | 2 | 2 | 2 | 3 | 1 | 2 | 2 | 4 | 1 | 3 | 2 | 1 | 3 | 1 | 3 | 1 | 2 | 2 | 4 | 1 | 4 | 17 | 0.18 |
| 35 | 2 | 2 | 4 | 2 | 3 | 1 | 3 | 1 | 4 | 3 | 4 | 1 | 3 | 3 | 3 | 3 | 1 | 3 | 1 | 4 | 3 | 3 | 15 | 0.73 |
| 36 | 1 | 4 | 4 | 4 | 3 | 1 | 4 | 1 | 1 | 2 | 3 | 2 | 3 | 1 | 3 | 3 | 1 | 4 | 1 | 1 | 2 | 4 | 16 | 0.19 |
| 37 | 3 | 4 | 3 | 2 | 3 | 2 | 1 | 3 | 1 | 2 | 4 | 2 | 1 | 2 | 3 | 3 | 2 | 1 | 3 | 1 | 2 | 3 | 15 | 0.73 |
| 38 | 2 | 2 | 1 | 4 | 3 | 2 | 2 | 3 | 4 | 3 | 3 | 3 | 1 | 2 | 3 | 3 | 2 | 2 | 3 | 4 | 3 | 4 | 17 | 0.24 |
| 39 | 2 | 3 | 4 | 1 | 3 | 2 | 3 | 4 | 4 | 1 | 3 | 3 | 2 | 1 | 4 | 3 | 2 | 3 | 4 | 4 | 1 | 4 | 18 | 0.17 |
| 40 | 2 | 4 | 3 | 2 | 3 | 2 | 4 | 4 | 1 | 4 | 3 | 3 | 3 | 4 | 1 | 3 | 2 | 4 | 4 | 1 | 4 | 4 | 17 | 0.24 |
| 41 | 4 | 4 | 4 | 3 | 3 | 3 | 1 | 2 | 2 | 1 | 4 | 3 | 1 | 3 | 4 | 3 | 3 | 1 | 2 | 2 | 1 | 3 | 17 | 0.82 |
| 42 | 3 | 2 | 4 | 3 | 3 | 3 | 2 | 2 | 3 | 4 | 3 | 4 | 1 | 1 | 2 | 3 | 3 | 2 | 2 | 3 | 4 | 4 | 16 | 0.31 |
| 43 | 4 | 2 | 2 | 1 | 3 | 3 | 3 | 1 | 3 | 2 | 4 | 3 | 3 | 1 | 2 | 3 | 3 | 3 | 1 | 3 | 2 | 3 | 17 | 0.71 |
| 44 | 4 | 3 | 3 | 4 | 3 | 3 | 4 | 1 | 2 | 3 | 4 | 3 | 4 | 2 | 1 | 3 | 3 | 4 | 1 | 2 | 3 | 3 | 16 | 0.56 |
| 45 | 4 | 1 | 4 | 2 | 3 | 4 | 1 | 3 | 2 | 3 | 3 | 1 | 4 | 1 | 1 | 3 | 4 | 1 | 3 | 2 | 3 | 4 | 16 | 0.19 |
| 46 | 1 | 1 | 4 | 4 | 3 | 4 | 2 | 3 | 3 | 2 | 4 | 4 | 2 | 3 | 1 | 3 | 4 | 2 | 3 | 3 | 2 | 3 | 17 | 0.71 |
| 47 | 4 | 3 | 2 | 4 | 3 | 4 | 3 | 4 | 3 | 4 | 3 | 1 | 2 | 3 | 3 | 3 | 4 | 3 | 4 | 3 | 4 | 4 | 16 | 0.13 |
| 48 | 1 | 3 | 2 | 2 | 3 | 4 | 4 | 4 | 2 | 1 | 4 | 4 | 4 | 1 | 3 | 3 | 4 | 4 | 4 | 2 | 1 | 3 | 18 | 0.89 |
| 49 | 1 | 1 | 1 | 1 | 4 | 1 | 1 | 2 | 3 | 1 | 4 | 2 | 4 | 2 | 4 | 4 | 1 | 1 | 2 | 3 | 1 | 1 | 16 | 1.00 |
| 50 | 1 | 2 | 2 | 2 | 4 | 1 | 2 | 2 | 2 | 4 | 4 | 2 | 1 | 3 | 1 | 4 | 1 | 2 | 2 | 2 | 4 | 1 | 17 | 0.94 |
| 51 | 1 | 3 | 3 | 3 | 4 | 1 | 3 | 1 | 2 | 2 | 4 | 2 | 2 | 4 | 2 | 4 | 1 | 3 | 1 | 2 | 2 | 1 | 17 | 0.82 |
| 52 | 2 | 3 | 1 | 3 | 4 | 1 | 4 | 1 | 3 | 3 | 1 | 1 | 4 | 4 | 4 | 4 | 1 | 4 | 1 | 3 | 3 | 4 | 16 | 0.44 |
| 53 | 2 | 1 | 2 | 3 | 4 | 2 | 1 | 3 | 3 | 3 | 4 | 3 | 4 | 3 | 2 | 4 | 2 | 1 | 3 | 3 | 3 | 1 | 17 | 0.94 |
| 54 | 3 | 1 | 2 | 3 | 4 | 2 | 2 | 3 | 2 | 2 | 1 | 2 | 2 | 1 | 4 | 4 | 2 | 2 | 3 | 2 | 2 | 4 | 18 | 0.28 |
| 55 | 3 | 2 | 1 | 4 | 4 | 2 | 3 | 4 | 2 | 4 | 1 | 2 | 3 | 4 | 1 | 4 | 2 | 3 | 4 | 2 | 4 | 4 | 17 | 0.12 |
| 56 | 3 | 3 | 4 | 1 | 4 | 2 | 4 | 4 | 3 | 1 | 1 | 2 | 4 | 3 | 2 | 4 | 2 | 4 | 4 | 3 | 1 | 4 | 17 | 0.06 |
| 57 | 4 | 4 | 4 | 3 | 4 | 3 | 1 | 2 | 4 | 4 | 1 | 3 | 1 | 3 | 4 | 4 | 3 | 1 | 2 | 4 | 4 | 4 | 19 | 0.11 |
| 58 | 4 | 1 | 1 | 2 | 4 | 3 | 2 | 2 | 1 | 1 | 1 | 3 | 2 | 4 | 3 | 4 | 3 | 2 | 2 | 1 | 1 | 4 | 16 | 0.19 |
| 59 | 3 | 3 | 1 | 2 | 4 | 3 | 3 | 1 | 1 | 3 | 4 | 4 | 2 | 2 | 1 | 4 | 3 | 3 | 1 | 1 | 3 | 1 | 17 | 0.94 |

|    |   |   |   |   |   |   |   |   |   |   |   |   |   |   |   |   |   |   |   |   |   |   |    |      |
|----|---|---|---|---|---|---|---|---|---|---|---|---|---|---|---|---|---|---|---|---|---|---|----|------|
| 60 | 4 | 3 | 3 | 4 | 4 | 3 | 4 | 1 | 4 | 2 | 1 | 3 | 4 | 2 | 1 | 4 | 3 | 4 | 1 | 4 | 2 | 4 | 17 | 0.18 |
| 61 | 4 | 1 | 4 | 2 | 4 | 4 | 1 | 3 | 4 | 2 | 4 | 1 | 4 | 1 | 1 | 4 | 4 | 1 | 3 | 4 | 2 | 1 | 16 | 0.69 |
| 62 | 4 | 2 | 3 | 1 | 4 | 4 | 2 | 3 | 1 | 3 | 4 | 1 | 1 | 4 | 4 | 4 | 4 | 2 | 3 | 1 | 3 | 1 | 17 | 0.82 |
| 63 | 1 | 2 | 3 | 3 | 4 | 4 | 3 | 4 | 1 | 1 | 1 | 4 | 3 | 2 | 4 | 4 | 4 | 3 | 4 | 1 | 1 | 4 | 17 | 0.29 |
| 64 | 1 | 3 | 2 | 2 | 4 | 4 | 4 | 4 | 4 | 4 | 1 | 4 | 4 | 1 | 3 | 4 | 4 | 4 | 4 | 4 | 4 | 4 | 16 | 0.38 |
| 65 | 1 | 1 | 1 | 1 | 1 | 1 | 1 | 4 | 3 | 3 | 1 | 2 | 4 | 1 | 1 | 2 | 4 | 1 | 4 | 3 | 3 | 2 | 17 | 0.47 |
| 66 | 2 | 1 | 1 | 1 | 3 | 1 | 2 | 4 | 2 | 2 | 2 | 1 | 2 | 1 | 1 | 2 | 2 | 2 | 4 | 2 | 2 | 1 | 18 | 0.72 |
| 67 | 1 | 3 | 1 | 1 | 3 | 3 | 3 | 3 | 2 | 4 | 1 | 2 | 2 | 1 | 1 | 4 | 2 | 3 | 3 | 2 | 4 | 2 | 17 | 0.24 |
| 68 | 1 | 4 | 1 | 1 | 4 | 4 | 4 | 3 | 3 | 1 | 1 | 2 | 3 | 1 | 1 | 1 | 3 | 4 | 3 | 3 | 1 | 2 | 16 | 0.19 |
| 69 | 2 | 1 | 1 | 2 | 2 | 3 | 1 | 1 | 3 | 1 | 1 | 3 | 4 | 1 | 2 | 3 | 2 | 1 | 1 | 3 | 1 | 2 | 18 | 0.39 |
| 70 | 3 | 1 | 1 | 2 | 2 | 3 | 2 | 1 | 2 | 4 | 2 | 2 | 2 | 1 | 2 | 1 | 4 | 2 | 1 | 2 | 4 | 1 | 17 | 0.71 |
| 71 | 3 | 2 | 1 | 2 | 1 | 4 | 3 | 2 | 2 | 2 | 2 | 2 | 3 | 1 | 2 | 4 | 1 | 3 | 2 | 2 | 2 | 1 | 18 | 0.94 |
| 72 | 2 | 4 | 1 | 2 | 3 | 2 | 4 | 2 | 3 | 3 | 1 | 3 | 3 | 1 | 2 | 4 | 1 | 4 | 2 | 3 | 3 | 2 | 17 | 0.24 |
| 73 | 4 | 4 | 1 | 3 | 4 | 3 | 1 | 4 | 4 | 2 | 2 | 3 | 1 | 1 | 3 | 3 | 4 | 1 | 4 | 4 | 2 | 1 | 18 | 0.50 |
| 74 | 4 | 1 | 1 | 3 | 1 | 2 | 2 | 4 | 1 | 3 | 2 | 3 | 2 | 1 | 3 | 4 | 3 | 2 | 4 | 1 | 3 | 1 | 18 | 0.89 |
| 75 | 4 | 2 | 1 | 3 | 2 | 1 | 3 | 3 | 1 | 1 | 2 | 3 | 3 | 1 | 3 | 1 | 2 | 3 | 3 | 1 | 1 | 1 | 18 | 0.72 |
| 76 | 4 | 3 | 1 | 3 | 3 | 4 | 4 | 3 | 4 | 4 | 2 | 3 | 4 | 1 | 3 | 2 | 1 | 4 | 3 | 4 | 4 | 1 | 18 | 0.67 |
| 77 | 4 | 1 | 1 | 4 | 4 | 2 | 1 | 1 | 4 | 4 | 1 | 1 | 4 | 1 | 4 | 1 | 1 | 1 | 1 | 4 | 4 | 2 | 18 | 0.11 |
| 78 | 1 | 1 | 1 | 4 | 4 | 4 | 2 | 1 | 1 | 1 | 2 | 4 | 2 | 1 | 4 | 3 | 1 | 2 | 1 | 1 | 1 | 1 | 15 | 0.73 |
| 79 | 4 | 3 | 1 | 4 | 2 | 4 | 3 | 2 | 1 | 3 | 1 | 1 | 2 | 1 | 4 | 3 | 3 | 3 | 2 | 1 | 3 | 2 | 15 | 0.27 |
| 80 | 4 | 4 | 1 | 4 | 1 | 3 | 4 | 2 | 4 | 2 | 1 | 1 | 3 | 1 | 4 | 2 | 2 | 4 | 2 | 4 | 2 | 2 | 18 | 0.11 |
| 81 | 1 | 1 | 2 | 1 | 1 | 1 | 1 | 4 | 1 | 2 | 2 | 2 | 4 | 2 | 1 | 2 | 4 | 1 | 4 | 1 | 2 | 3 | 18 | 0.33 |
| 82 | 2 | 1 | 2 | 1 | 3 | 1 | 2 | 4 | 4 | 3 | 3 | 1 | 2 | 2 | 1 | 2 | 2 | 2 | 4 | 4 | 3 | 2 | 18 | 0.72 |
| 83 | 2 | 2 | 2 | 1 | 4 | 2 | 3 | 3 | 4 | 1 | 3 | 1 | 3 | 2 | 1 | 3 | 3 | 3 | 3 | 4 | 1 | 2 | 17 | 0.71 |
| 84 | 1 | 4 | 2 | 1 | 4 | 4 | 4 | 3 | 1 | 4 | 2 | 2 | 3 | 2 | 1 | 1 | 3 | 4 | 3 | 1 | 4 | 3 | 17 | 0.24 |
| 85 | 3 | 4 | 2 | 2 | 3 | 2 | 1 | 1 | 1 | 4 | 3 | 2 | 1 | 2 | 2 | 2 | 3 | 1 | 1 | 1 | 4 | 2 | 15 | 0.47 |
| 86 | 2 | 2 | 2 | 2 | 1 | 4 | 2 | 1 | 4 | 1 | 2 | 3 | 1 | 2 | 2 | 2 | 3 | 2 | 1 | 4 | 1 | 3 | 18 | 0.06 |
| 87 | 2 | 3 | 2 | 2 | 4 | 1 | 3 | 2 | 4 | 3 | 2 | 3 | 2 | 2 | 2 | 1 | 4 | 3 | 2 | 4 | 3 | 3 | 18 | 0.06 |
| 88 | 2 | 4 | 2 | 2 | 3 | 2 | 4 | 2 | 1 | 2 | 2 | 3 | 3 | 2 | 2 | 4 | 1 | 4 | 2 | 1 | 2 | 3 | 16 | 0.44 |
| 89 | 4 | 4 | 2 | 3 | 4 | 3 | 1 | 4 | 2 | 3 | 3 | 3 | 1 | 2 | 3 | 3 | 4 | 1 | 4 | 2 | 3 | 2 | 18 | 0.61 |
| 90 | 4 | 1 | 2 | 3 | 1 | 2 | 2 | 4 | 3 | 2 | 3 | 3 | 2 | 2 | 3 | 4 | 3 | 2 | 4 | 3 | 2 | 2 | 18 | 0.83 |
| 91 | 3 | 3 | 2 | 3 | 1 | 2 | 3 | 3 | 3 | 4 | 2 | 4 | 2 | 2 | 3 | 2 | 1 | 3 | 3 | 3 | 4 | 3 | 18 | 0.22 |

|     |   |   |   |   |   |   |   |   |   |   |   |   |   |   |   |   |   |   |   |   |   |   |    |      |
|-----|---|---|---|---|---|---|---|---|---|---|---|---|---|---|---|---|---|---|---|---|---|---|----|------|
| 92  | 3 | 4 | 2 | 3 | 2 | 1 | 4 | 3 | 2 | 1 | 2 | 4 | 3 | 2 | 3 | 3 | 4 | 4 | 3 | 2 | 1 | 3 | 17 | 0.41 |
| 93  | 4 | 1 | 2 | 4 | 4 | 2 | 1 | 1 | 2 | 1 | 2 | 1 | 4 | 2 | 4 | 1 | 1 | 1 | 1 | 2 | 1 | 3 | 18 | 0.06 |
| 94  | 1 | 1 | 2 | 4 | 4 | 4 | 2 | 1 | 3 | 4 | 3 | 4 | 2 | 2 | 4 | 3 | 1 | 2 | 1 | 3 | 4 | 2 | 18 | 0.56 |
| 95  | 1 | 2 | 2 | 4 | 3 | 3 | 3 | 2 | 3 | 2 | 3 | 4 | 3 | 2 | 4 | 2 | 4 | 3 | 2 | 3 | 2 | 2 | 15 | 0.73 |
| 96  | 1 | 3 | 2 | 4 | 2 | 2 | 4 | 2 | 2 | 3 | 3 | 4 | 4 | 2 | 4 | 1 | 3 | 4 | 2 | 2 | 3 | 2 | 17 | 0.94 |
| 97  | 1 | 1 | 3 | 1 | 1 | 1 | 1 | 2 | 1 | 4 | 3 | 2 | 4 | 3 | 1 | 2 | 4 | 1 | 2 | 1 | 4 | 4 | 17 | 0.35 |
| 98  | 2 | 1 | 3 | 1 | 3 | 1 | 2 | 2 | 4 | 1 | 4 | 1 | 2 | 3 | 1 | 2 | 2 | 2 | 2 | 4 | 1 | 3 | 17 | 0.76 |
| 99  | 1 | 3 | 3 | 1 | 3 | 3 | 3 | 1 | 4 | 3 | 3 | 2 | 2 | 3 | 1 | 4 | 2 | 3 | 1 | 4 | 3 | 4 | 17 | 0.35 |
| 100 | 2 | 3 | 3 | 1 | 1 | 3 | 4 | 1 | 1 | 2 | 4 | 1 | 4 | 3 | 1 | 4 | 4 | 4 | 1 | 1 | 2 | 3 | 16 | 1.00 |
| 101 | 3 | 4 | 3 | 2 | 3 | 2 | 1 | 3 | 1 | 2 | 4 | 2 | 1 | 3 | 2 | 2 | 3 | 1 | 3 | 1 | 2 | 3 | 15 | 0.47 |
| 102 | 3 | 1 | 3 | 2 | 2 | 3 | 2 | 3 | 4 | 3 | 4 | 2 | 2 | 3 | 2 | 1 | 4 | 2 | 3 | 4 | 3 | 3 | 18 | 0.72 |
| 103 | 2 | 3 | 3 | 2 | 4 | 1 | 3 | 4 | 4 | 1 | 3 | 3 | 2 | 3 | 2 | 1 | 4 | 3 | 4 | 4 | 1 | 4 | 16 | 0.19 |
| 104 | 2 | 4 | 3 | 2 | 3 | 2 | 4 | 4 | 1 | 4 | 3 | 3 | 3 | 3 | 2 | 4 | 1 | 4 | 4 | 1 | 4 | 4 | 17 | 0.29 |
| 105 | 4 | 4 | 3 | 3 | 4 | 3 | 1 | 2 | 2 | 1 | 4 | 3 | 1 | 3 | 3 | 3 | 4 | 1 | 2 | 2 | 1 | 3 | 17 | 0.53 |
| 106 | 3 | 2 | 3 | 3 | 4 | 3 | 2 | 2 | 3 | 4 | 3 | 4 | 1 | 3 | 3 | 1 | 2 | 2 | 2 | 3 | 4 | 4 | 18 | 0.17 |
| 107 | 3 | 3 | 3 | 3 | 1 | 2 | 3 | 1 | 3 | 2 | 3 | 4 | 2 | 3 | 3 | 2 | 1 | 3 | 1 | 3 | 2 | 4 | 17 | 0.47 |
| 108 | 4 | 3 | 3 | 3 | 3 | 4 | 4 | 1 | 2 | 3 | 4 | 3 | 4 | 3 | 3 | 2 | 1 | 4 | 1 | 2 | 3 | 3 | 16 | 0.69 |
| 109 | 1 | 4 | 3 | 4 | 1 | 1 | 1 | 3 | 2 | 3 | 4 | 4 | 1 | 3 | 4 | 4 | 2 | 1 | 3 | 2 | 3 | 3 | 17 | 0.94 |
| 110 | 4 | 2 | 3 | 4 | 3 | 1 | 2 | 3 | 3 | 2 | 3 | 1 | 1 | 3 | 4 | 4 | 4 | 2 | 3 | 3 | 2 | 4 | 18 | 0.28 |
| 111 | 4 | 3 | 3 | 4 | 2 | 4 | 3 | 4 | 3 | 4 | 3 | 1 | 2 | 3 | 4 | 3 | 3 | 3 | 4 | 3 | 4 | 4 | 19 | 0.16 |
| 112 | 4 | 4 | 3 | 4 | 1 | 3 | 4 | 4 | 2 | 1 | 3 | 1 | 3 | 3 | 4 | 2 | 2 | 4 | 4 | 2 | 1 | 4 | 17 | 0.06 |
| 113 | 1 | 1 | 4 | 1 | 1 | 1 | 1 | 2 | 3 | 1 | 4 | 2 | 4 | 4 | 1 | 2 | 4 | 1 | 2 | 3 | 1 | 1 | 18 | 0.83 |
| 114 | 1 | 2 | 4 | 1 | 2 | 2 | 2 | 2 | 2 | 4 | 4 | 2 | 1 | 4 | 1 | 3 | 1 | 2 | 2 | 2 | 4 | 1 | 18 | 0.94 |
| 115 | 2 | 2 | 4 | 1 | 4 | 2 | 3 | 1 | 2 | 2 | 1 | 1 | 3 | 4 | 1 | 3 | 3 | 3 | 1 | 2 | 2 | 4 | 17 | 0.12 |
| 116 | 1 | 4 | 4 | 1 | 4 | 4 | 4 | 1 | 3 | 3 | 4 | 2 | 3 | 4 | 1 | 1 | 3 | 4 | 1 | 3 | 3 | 1 | 16 | 0.75 |
| 117 | 3 | 4 | 4 | 2 | 3 | 2 | 1 | 3 | 3 | 3 | 1 | 2 | 1 | 4 | 2 | 2 | 3 | 1 | 3 | 3 | 3 | 4 | 17 | 0.06 |
| 118 | 2 | 2 | 4 | 2 | 1 | 4 | 2 | 3 | 2 | 2 | 4 | 3 | 1 | 4 | 2 | 2 | 3 | 2 | 3 | 2 | 2 | 1 | 18 | 0.83 |
| 119 | 2 | 3 | 4 | 2 | 4 | 1 | 3 | 4 | 2 | 4 | 4 | 3 | 2 | 4 | 2 | 1 | 4 | 3 | 4 | 2 | 4 | 1 | 17 | 0.65 |
| 120 | 3 | 3 | 4 | 2 | 4 | 1 | 4 | 4 | 3 | 1 | 1 | 2 | 4 | 4 | 2 | 3 | 2 | 4 | 4 | 3 | 1 | 4 | 17 | 0.12 |
| 121 | 4 | 4 | 4 | 3 | 4 | 3 | 1 | 2 | 4 | 4 | 1 | 3 | 1 | 4 | 3 | 3 | 4 | 1 | 2 | 4 | 4 | 4 | 16 | 0.06 |
| 122 | 3 | 2 | 4 | 3 | 4 | 3 | 2 | 2 | 1 | 1 | 4 | 4 | 1 | 4 | 3 | 1 | 2 | 2 | 2 | 1 | 1 | 1 | 17 | 0.71 |
| 123 | 3 | 3 | 4 | 3 | 1 | 2 | 3 | 1 | 1 | 3 | 4 | 4 | 2 | 4 | 3 | 2 | 1 | 3 | 1 | 1 | 3 | 1 | 15 | 0.80 |

|     |   |   |   |   |   |   |   |   |   |   |   |   |   |   |   |   |   |   |   |   |   |   |    |      |
|-----|---|---|---|---|---|---|---|---|---|---|---|---|---|---|---|---|---|---|---|---|---|---|----|------|
| 124 | 4 | 3 | 4 | 3 | 3 | 4 | 4 | 1 | 4 | 2 | 1 | 3 | 4 | 4 | 3 | 2 | 1 | 4 | 1 | 4 | 2 | 4 | 18 | 0.17 |
| 125 | 4 | 1 | 4 | 4 | 4 | 2 | 1 | 3 | 4 | 2 | 4 | 1 | 4 | 4 | 4 | 1 | 1 | 1 | 3 | 4 | 2 | 1 | 18 | 0.44 |
| 126 | 4 | 2 | 4 | 4 | 3 | 1 | 2 | 3 | 1 | 3 | 4 | 1 | 1 | 4 | 4 | 4 | 4 | 2 | 3 | 1 | 3 | 1 | 17 | 0.88 |
| 127 | 4 | 3 | 4 | 4 | 2 | 4 | 3 | 4 | 1 | 1 | 4 | 1 | 2 | 4 | 4 | 3 | 3 | 3 | 4 | 1 | 1 | 1 | 18 | 0.72 |
| 128 | 1 | 3 | 4 | 4 | 2 | 2 | 4 | 4 | 4 | 4 | 1 | 4 | 4 | 4 | 4 | 1 | 3 | 4 | 4 | 4 | 4 | 4 | 17 | 0.24 |
| 129 | 1 | 1 | 1 | 1 | 1 | 1 | 1 | 4 | 3 | 3 | 1 | 2 | 1 | 4 | 1 | 2 | 1 | 4 | 4 | 3 | 3 | 2 | 17 | 0.35 |
| 130 | 1 | 1 | 2 | 1 | 2 | 2 | 2 | 4 | 2 | 2 | 1 | 2 | 1 | 1 | 1 | 3 | 2 | 1 | 4 | 2 | 2 | 2 | 18 | 0.06 |
| 131 | 1 | 1 | 3 | 1 | 3 | 3 | 3 | 3 | 2 | 4 | 1 | 2 | 1 | 2 | 1 | 4 | 3 | 2 | 3 | 2 | 4 | 2 | 18 | 0.28 |
| 132 | 2 | 1 | 3 | 1 | 1 | 4 | 3 | 3 | 3 | 1 | 2 | 1 | 1 | 4 | 1 | 4 | 4 | 4 | 3 | 3 | 1 | 1 | 18 | 0.83 |
| 133 | 3 | 1 | 4 | 2 | 3 | 1 | 2 | 1 | 3 | 1 | 2 | 2 | 1 | 1 | 2 | 2 | 1 | 3 | 1 | 3 | 1 | 1 | 16 | 0.56 |
| 134 | 2 | 1 | 2 | 2 | 1 | 2 | 4 | 1 | 2 | 4 | 1 | 3 | 1 | 1 | 2 | 2 | 2 | 3 | 1 | 2 | 4 | 2 | 18 | 0.17 |
| 135 | 2 | 1 | 3 | 2 | 4 | 3 | 1 | 2 | 2 | 2 | 1 | 3 | 1 | 2 | 2 | 1 | 3 | 4 | 2 | 2 | 2 | 2 | 17 | 0.06 |
| 136 | 2 | 1 | 4 | 2 | 3 | 4 | 2 | 2 | 3 | 3 | 1 | 3 | 1 | 3 | 2 | 4 | 4 | 1 | 2 | 3 | 3 | 2 | 19 | 0.42 |
| 137 | 3 | 1 | 1 | 3 | 3 | 1 | 4 | 4 | 4 | 2 | 1 | 4 | 1 | 4 | 3 | 4 | 1 | 3 | 4 | 4 | 2 | 2 | 18 | 0.67 |
| 138 | 4 | 1 | 1 | 3 | 1 | 2 | 2 | 4 | 1 | 3 | 2 | 3 | 1 | 2 | 3 | 4 | 2 | 3 | 4 | 1 | 3 | 1 | 18 | 0.67 |
| 139 | 3 | 1 | 3 | 3 | 1 | 3 | 2 | 3 | 1 | 1 | 1 | 4 | 1 | 2 | 3 | 2 | 3 | 1 | 3 | 1 | 1 | 2 | 17 | 0.47 |
| 140 | 4 | 1 | 3 | 3 | 3 | 4 | 4 | 3 | 4 | 4 | 2 | 3 | 1 | 4 | 3 | 2 | 4 | 1 | 3 | 4 | 4 | 1 | 16 | 0.63 |
| 141 | 1 | 1 | 4 | 4 | 1 | 1 | 1 | 1 | 4 | 4 | 2 | 4 | 1 | 1 | 4 | 4 | 1 | 2 | 1 | 4 | 4 | 1 | 18 | 0.89 |
| 142 | 1 | 1 | 1 | 4 | 4 | 2 | 4 | 1 | 1 | 1 | 2 | 4 | 1 | 2 | 4 | 3 | 2 | 1 | 1 | 1 | 1 | 1 | 17 | 0.76 |
| 143 | 4 | 1 | 3 | 4 | 2 | 3 | 4 | 2 | 1 | 3 | 1 | 1 | 1 | 2 | 4 | 3 | 3 | 3 | 2 | 1 | 3 | 2 | 15 | 0.13 |
| 144 | 1 | 1 | 3 | 4 | 2 | 4 | 2 | 2 | 4 | 2 | 2 | 4 | 1 | 4 | 4 | 1 | 4 | 3 | 2 | 4 | 2 | 1 | 19 | 0.79 |
| 145 | 2 | 2 | 4 | 1 | 2 | 1 | 4 | 4 | 1 | 2 | 3 | 1 | 2 | 1 | 1 | 1 | 1 | 1 | 4 | 1 | 2 | 2 | 18 | 0.72 |
| 146 | 2 | 2 | 1 | 1 | 3 | 2 | 1 | 4 | 4 | 3 | 3 | 1 | 2 | 2 | 1 | 2 | 2 | 2 | 4 | 4 | 3 | 2 | 17 | 0.65 |
| 147 | 1 | 2 | 3 | 1 | 3 | 3 | 3 | 3 | 4 | 1 | 2 | 2 | 2 | 2 | 1 | 4 | 3 | 2 | 3 | 4 | 1 | 3 | 16 | 0.13 |
| 148 | 1 | 2 | 4 | 1 | 4 | 4 | 4 | 3 | 1 | 4 | 2 | 2 | 2 | 3 | 1 | 1 | 4 | 3 | 3 | 1 | 4 | 3 | 17 | 0.12 |
| 149 | 2 | 2 | 1 | 2 | 2 | 1 | 3 | 1 | 1 | 4 | 2 | 3 | 2 | 4 | 2 | 3 | 1 | 2 | 1 | 1 | 4 | 3 | 18 | 0.44 |
| 150 | 2 | 2 | 2 | 2 | 1 | 2 | 4 | 1 | 4 | 1 | 2 | 3 | 2 | 1 | 2 | 2 | 2 | 3 | 1 | 4 | 1 | 3 | 17 | 0.24 |
| 151 | 2 | 2 | 3 | 2 | 4 | 3 | 1 | 2 | 4 | 3 | 2 | 3 | 2 | 2 | 2 | 1 | 3 | 4 | 2 | 4 | 3 | 3 | 17 | 0.06 |
| 152 | 3 | 2 | 3 | 2 | 4 | 4 | 1 | 2 | 1 | 2 | 3 | 2 | 2 | 4 | 2 | 3 | 4 | 2 | 2 | 1 | 2 | 2 | 17 | 0.82 |
| 153 | 4 | 2 | 4 | 3 | 4 | 1 | 3 | 4 | 2 | 3 | 3 | 3 | 2 | 1 | 3 | 3 | 1 | 4 | 4 | 2 | 3 | 2 | 17 | 0.59 |
| 154 | 3 | 2 | 2 | 3 | 4 | 2 | 3 | 4 | 3 | 2 | 2 | 4 | 2 | 1 | 3 | 1 | 2 | 2 | 4 | 3 | 2 | 3 | 18 | 0.11 |
| 155 | 4 | 2 | 2 | 3 | 2 | 3 | 1 | 3 | 3 | 4 | 3 | 3 | 2 | 3 | 3 | 1 | 3 | 2 | 3 | 3 | 4 | 2 | 18 | 0.78 |

|     |   |   |   |   |   |   |   |   |   |   |   |   |   |   |   |   |   |   |   |   |   |   |    |      |
|-----|---|---|---|---|---|---|---|---|---|---|---|---|---|---|---|---|---|---|---|---|---|---|----|------|
| 156 | 3 | 2 | 4 | 3 | 2 | 4 | 1 | 3 | 2 | 1 | 2 | 4 | 2 | 3 | 3 | 3 | 4 | 4 | 3 | 2 | 1 | 3 | 18 | 0.28 |
| 157 | 4 | 2 | 1 | 4 | 4 | 1 | 2 | 1 | 2 | 1 | 2 | 1 | 2 | 4 | 4 | 1 | 1 | 1 | 1 | 2 | 1 | 3 | 17 | 0.06 |
| 158 | 1 | 2 | 1 | 4 | 4 | 2 | 4 | 1 | 3 | 4 | 3 | 4 | 2 | 2 | 4 | 3 | 2 | 1 | 1 | 3 | 4 | 2 | 18 | 0.89 |
| 159 | 4 | 2 | 3 | 4 | 2 | 3 | 4 | 2 | 3 | 2 | 2 | 1 | 2 | 2 | 4 | 3 | 3 | 3 | 2 | 3 | 2 | 3 | 18 | 0.17 |
| 160 | 4 | 2 | 4 | 4 | 1 | 4 | 3 | 2 | 2 | 3 | 2 | 1 | 2 | 3 | 4 | 2 | 4 | 2 | 2 | 2 | 3 | 3 | 15 | 0.07 |
| 161 | 2 | 3 | 4 | 1 | 2 | 1 | 4 | 2 | 1 | 4 | 4 | 1 | 3 | 1 | 1 | 1 | 1 | 1 | 2 | 1 | 4 | 3 | 16 | 0.63 |
| 162 | 2 | 3 | 1 | 1 | 3 | 2 | 1 | 2 | 4 | 1 | 4 | 1 | 3 | 2 | 1 | 2 | 2 | 2 | 2 | 4 | 1 | 3 | 17 | 0.53 |
| 163 | 2 | 3 | 2 | 1 | 4 | 3 | 2 | 1 | 4 | 3 | 4 | 1 | 3 | 3 | 1 | 3 | 3 | 3 | 1 | 4 | 3 | 3 | 17 | 0.76 |
| 164 | 1 | 3 | 4 | 1 | 4 | 4 | 4 | 1 | 1 | 2 | 3 | 2 | 3 | 3 | 1 | 1 | 4 | 3 | 1 | 1 | 2 | 4 | 18 | 0.11 |
| 165 | 3 | 3 | 4 | 2 | 3 | 1 | 2 | 3 | 1 | 2 | 4 | 2 | 3 | 1 | 2 | 2 | 1 | 3 | 3 | 1 | 2 | 3 | 17 | 0.59 |
| 166 | 3 | 3 | 1 | 2 | 2 | 2 | 3 | 3 | 4 | 3 | 4 | 2 | 3 | 2 | 2 | 1 | 2 | 4 | 3 | 4 | 3 | 3 | 18 | 0.94 |
| 167 | 2 | 3 | 3 | 2 | 4 | 3 | 1 | 4 | 4 | 1 | 3 | 3 | 3 | 2 | 2 | 1 | 3 | 4 | 4 | 4 | 1 | 4 | 18 | 0.06 |
| 168 | 3 | 3 | 3 | 2 | 4 | 4 | 1 | 4 | 1 | 4 | 4 | 2 | 3 | 4 | 2 | 3 | 4 | 2 | 4 | 1 | 4 | 3 | 17 | 0.94 |
| 169 | 3 | 3 | 1 | 3 | 3 | 1 | 4 | 2 | 2 | 1 | 3 | 4 | 3 | 4 | 3 | 4 | 1 | 3 | 2 | 2 | 1 | 4 | 17 | 0.65 |
| 170 | 3 | 3 | 2 | 3 | 4 | 2 | 3 | 2 | 3 | 4 | 3 | 4 | 3 | 1 | 3 | 1 | 2 | 2 | 2 | 3 | 4 | 4 | 16 | 0.19 |
| 171 | 4 | 3 | 2 | 3 | 2 | 3 | 1 | 1 | 3 | 2 | 4 | 3 | 3 | 3 | 3 | 1 | 3 | 2 | 1 | 3 | 2 | 3 | 17 | 0.71 |
| 172 | 3 | 3 | 4 | 3 | 2 | 4 | 1 | 1 | 2 | 3 | 3 | 4 | 3 | 3 | 3 | 3 | 4 | 4 | 1 | 2 | 3 | 4 | 18 | 0.50 |
| 173 | 1 | 3 | 4 | 4 | 1 | 1 | 1 | 3 | 2 | 3 | 4 | 4 | 3 | 1 | 4 | 4 | 1 | 2 | 3 | 2 | 3 | 3 | 18 | 0.94 |
| 174 | 1 | 3 | 1 | 4 | 4 | 2 | 4 | 3 | 3 | 2 | 4 | 4 | 3 | 2 | 4 | 3 | 2 | 1 | 3 | 3 | 2 | 3 | 17 | 0.76 |
| 175 | 4 | 3 | 3 | 4 | 2 | 3 | 4 | 4 | 3 | 4 | 3 | 1 | 3 | 2 | 4 | 3 | 3 | 3 | 4 | 3 | 4 | 4 | 17 | 0.12 |
| 176 | 1 | 3 | 3 | 4 | 2 | 4 | 2 | 4 | 2 | 1 | 4 | 4 | 3 | 4 | 4 | 1 | 4 | 3 | 4 | 2 | 1 | 3 | 17 | 0.88 |
| 177 | 2 | 4 | 4 | 1 | 2 | 1 | 4 | 2 | 3 | 1 | 1 | 1 | 4 | 1 | 1 | 1 | 1 | 1 | 2 | 3 | 1 | 4 | 17 | 0.00 |
| 178 | 2 | 4 | 1 | 1 | 3 | 2 | 1 | 2 | 2 | 4 | 1 | 1 | 4 | 2 | 1 | 2 | 2 | 2 | 2 | 2 | 4 | 4 | 17 | 0.06 |
| 179 | 2 | 4 | 2 | 1 | 4 | 3 | 2 | 1 | 2 | 2 | 1 | 1 | 4 | 3 | 1 | 3 | 3 | 3 | 1 | 2 | 2 | 4 | 16 | 0.13 |
| 180 | 1 | 4 | 4 | 1 | 4 | 4 | 4 | 1 | 3 | 3 | 4 | 2 | 4 | 3 | 1 | 1 | 4 | 3 | 1 | 3 | 3 | 1 | 17 | 0.76 |
| 181 | 2 | 4 | 1 | 2 | 2 | 1 | 3 | 3 | 3 | 3 | 4 | 3 | 4 | 4 | 2 | 3 | 1 | 2 | 3 | 3 | 3 | 1 | 18 | 0.89 |
| 182 | 3 | 4 | 1 | 2 | 2 | 2 | 3 | 3 | 2 | 2 | 1 | 2 | 4 | 2 | 2 | 1 | 2 | 4 | 3 | 2 | 2 | 4 | 17 | 0.06 |
| 183 | 2 | 4 | 3 | 2 | 4 | 3 | 1 | 4 | 2 | 4 | 4 | 3 | 4 | 2 | 2 | 1 | 3 | 4 | 4 | 2 | 4 | 1 | 17 | 0.53 |
| 184 | 2 | 4 | 4 | 2 | 3 | 4 | 2 | 4 | 3 | 1 | 4 | 3 | 4 | 3 | 2 | 4 | 4 | 1 | 4 | 3 | 1 | 1 | 16 | 0.75 |
| 185 | 3 | 4 | 1 | 3 | 3 | 1 | 4 | 2 | 4 | 4 | 4 | 4 | 4 | 4 | 3 | 4 | 1 | 3 | 2 | 4 | 4 | 1 | 17 | 0.88 |
| 186 | 3 | 4 | 2 | 3 | 4 | 2 | 3 | 2 | 1 | 1 | 4 | 4 | 4 | 1 | 3 | 1 | 2 | 2 | 2 | 1 | 1 | 1 | 18 | 0.78 |
| 187 | 4 | 4 | 2 | 3 | 2 | 3 | 1 | 1 | 1 | 3 | 1 | 3 | 4 | 3 | 3 | 1 | 3 | 2 | 1 | 1 | 3 | 4 | 16 | 0.06 |

|     |   |   |   |   |   |   |   |   |   |   |   |   |   |   |   |   |   |   |   |   |   |   |    |      |
|-----|---|---|---|---|---|---|---|---|---|---|---|---|---|---|---|---|---|---|---|---|---|---|----|------|
| 188 | 4 | 4 | 3 | 3 | 3 | 4 | 4 | 1 | 4 | 2 | 1 | 3 | 4 | 4 | 3 | 2 | 4 | 1 | 1 | 4 | 2 | 4 | 17 | 0.18 |
| 189 | 1 | 4 | 4 | 4 | 1 | 1 | 1 | 3 | 4 | 2 | 1 | 4 | 4 | 1 | 4 | 4 | 1 | 2 | 3 | 4 | 2 | 4 | 18 | 0.22 |
| 190 | 1 | 4 | 1 | 4 | 4 | 2 | 4 | 3 | 1 | 3 | 1 | 4 | 4 | 2 | 4 | 3 | 2 | 1 | 3 | 1 | 3 | 4 | 15 | 0.20 |
| 191 | 1 | 4 | 2 | 4 | 3 | 3 | 3 | 4 | 1 | 1 | 1 | 4 | 4 | 3 | 4 | 2 | 3 | 4 | 4 | 1 | 1 | 4 | 17 | 0.24 |
| 192 | 1 | 4 | 3 | 4 | 2 | 4 | 2 | 4 | 4 | 4 | 1 | 4 | 4 | 4 | 4 | 1 | 4 | 3 | 4 | 4 | 4 | 4 | 18 | 0.22 |
| 193 | 1 | 1 | 1 | 1 | 1 | 4 | 3 | 1 | 1 | 3 | 1 | 2 | 1 | 1 | 4 | 1 | 4 | 3 | 2 | 4 | 3 | 2 | 18 | 0.56 |
| 194 | 2 | 1 | 1 | 1 | 2 | 4 | 2 | 3 | 1 | 2 | 2 | 1 | 1 | 1 | 2 | 2 | 4 | 2 | 2 | 2 | 2 | 1 | 18 | 0.89 |
| 195 | 2 | 1 | 1 | 2 | 3 | 3 | 2 | 4 | 2 | 4 | 2 | 1 | 1 | 1 | 3 | 3 | 3 | 2 | 3 | 3 | 4 | 1 | 18 | 0.94 |
| 196 | 2 | 1 | 1 | 3 | 4 | 3 | 3 | 1 | 3 | 1 | 2 | 1 | 1 | 1 | 4 | 4 | 3 | 3 | 4 | 4 | 1 | 1 | 16 | 0.88 |
| 197 | 3 | 1 | 2 | 4 | 1 | 1 | 3 | 3 | 2 | 1 | 2 | 2 | 1 | 2 | 1 | 1 | 1 | 3 | 2 | 3 | 1 | 1 | 17 | 0.71 |
| 198 | 2 | 1 | 2 | 2 | 2 | 1 | 2 | 1 | 4 | 4 | 1 | 3 | 1 | 2 | 1 | 2 | 1 | 2 | 2 | 3 | 4 | 2 | 16 | 0.19 |
| 199 | 2 | 1 | 2 | 3 | 3 | 2 | 2 | 4 | 1 | 2 | 1 | 3 | 1 | 2 | 2 | 3 | 2 | 2 | 1 | 4 | 2 | 2 | 17 | 0.18 |
| 200 | 2 | 1 | 2 | 4 | 4 | 2 | 3 | 3 | 2 | 3 | 1 | 3 | 1 | 2 | 3 | 4 | 2 | 3 | 4 | 1 | 3 | 2 | 17 | 0.18 |
| 201 | 4 | 1 | 3 | 4 | 1 | 4 | 4 | 4 | 3 | 2 | 2 | 3 | 1 | 3 | 1 | 1 | 4 | 4 | 3 | 4 | 2 | 1 | 17 | 0.41 |
| 202 | 4 | 1 | 3 | 1 | 2 | 4 | 1 | 1 | 2 | 3 | 2 | 3 | 1 | 3 | 2 | 2 | 4 | 1 | 4 | 3 | 3 | 1 | 18 | 0.67 |
| 203 | 3 | 1 | 3 | 3 | 3 | 3 | 1 | 1 | 2 | 1 | 1 | 4 | 1 | 3 | 2 | 3 | 3 | 1 | 2 | 1 | 1 | 2 | 18 | 0.17 |
| 204 | 4 | 1 | 3 | 3 | 4 | 3 | 4 | 3 | 4 | 4 | 2 | 3 | 1 | 3 | 4 | 4 | 3 | 4 | 2 | 1 | 4 | 1 | 18 | 0.44 |
| 205 | 4 | 1 | 4 | 1 | 1 | 1 | 4 | 4 | 2 | 4 | 1 | 1 | 1 | 4 | 4 | 1 | 1 | 4 | 1 | 1 | 4 | 2 | 17 | 0.47 |
| 206 | 4 | 1 | 4 | 2 | 2 | 1 | 1 | 3 | 1 | 1 | 1 | 1 | 1 | 4 | 1 | 2 | 1 | 1 | 4 | 4 | 1 | 2 | 18 | 0.39 |
| 207 | 1 | 1 | 4 | 2 | 3 | 2 | 1 | 3 | 3 | 3 | 2 | 4 | 1 | 4 | 3 | 3 | 2 | 1 | 2 | 4 | 3 | 1 | 16 | 0.94 |
| 208 | 4 | 1 | 4 | 4 | 4 | 2 | 4 | 1 | 3 | 2 | 1 | 1 | 1 | 4 | 3 | 4 | 2 | 4 | 2 | 2 | 2 | 2 | 17 | 0.12 |
| 209 | 1 | 2 | 1 | 1 | 1 | 4 | 1 | 1 | 1 | 2 | 2 | 2 | 2 | 1 | 4 | 1 | 4 | 1 | 2 | 4 | 2 | 3 | 18 | 0.44 |
| 210 | 2 | 2 | 1 | 1 | 2 | 4 | 4 | 3 | 1 | 3 | 3 | 1 | 2 | 1 | 2 | 2 | 4 | 4 | 2 | 2 | 3 | 2 | 17 | 0.88 |
| 211 | 2 | 2 | 1 | 2 | 3 | 3 | 4 | 4 | 2 | 1 | 3 | 1 | 2 | 1 | 3 | 3 | 3 | 4 | 3 | 3 | 1 | 2 | 16 | 0.94 |
| 212 | 1 | 2 | 1 | 4 | 4 | 3 | 1 | 4 | 4 | 4 | 2 | 2 | 2 | 1 | 3 | 4 | 3 | 1 | 1 | 3 | 4 | 3 | 16 | 0.00 |
| 213 | 3 | 2 | 2 | 4 | 1 | 1 | 1 | 3 | 2 | 4 | 3 | 2 | 2 | 2 | 1 | 1 | 1 | 1 | 2 | 3 | 4 | 2 | 18 | 0.72 |
| 214 | 3 | 2 | 2 | 1 | 2 | 1 | 4 | 2 | 3 | 1 | 3 | 2 | 2 | 2 | 2 | 2 | 1 | 4 | 1 | 4 | 1 | 2 | 17 | 0.76 |
| 215 | 3 | 2 | 2 | 2 | 3 | 2 | 4 | 1 | 4 | 3 | 3 | 2 | 2 | 2 | 3 | 3 | 2 | 4 | 4 | 1 | 3 | 2 | 18 | 0.89 |
| 216 | 2 | 2 | 2 | 4 | 4 | 2 | 1 | 3 | 2 | 2 | 2 | 3 | 2 | 2 | 3 | 4 | 2 | 1 | 4 | 1 | 2 | 3 | 17 | 0.06 |
| 217 | 4 | 2 | 3 | 4 | 1 | 4 | 2 | 4 | 3 | 3 | 3 | 3 | 2 | 3 | 1 | 1 | 4 | 2 | 3 | 4 | 3 | 2 | 17 | 0.53 |
| 218 | 3 | 2 | 3 | 2 | 2 | 4 | 3 | 4 | 3 | 2 | 2 | 4 | 2 | 3 | 1 | 2 | 4 | 3 | 1 | 2 | 2 | 3 | 17 | 0.12 |
| 219 | 4 | 2 | 3 | 2 | 3 | 3 | 3 | 2 | 1 | 4 | 3 | 3 | 2 | 3 | 3 | 3 | 3 | 3 | 1 | 2 | 4 | 2 | 16 | 0.88 |



|     |   |   |   |   |   |   |   |   |   |   |   |   |   |   |   |   |   |   |   |   |   |   |    |      |
|-----|---|---|---|---|---|---|---|---|---|---|---|---|---|---|---|---|---|---|---|---|---|---|----|------|
| 220 | 4 | 2 | 3 | 3 | 4 | 3 | 2 | 3 | 4 | 1 | 3 | 3 | 2 | 3 | 4 | 4 | 3 | 2 | 2 | 1 | 1 | 2 | 18 | 0.44 |
| 221 | 4 | 2 | 4 | 1 | 1 | 1 | 2 | 4 | 2 | 1 | 2 | 1 | 2 | 4 | 4 | 1 | 1 | 2 | 1 | 1 | 1 | 3 | 18 | 0.22 |
| 222 | 1 | 2 | 4 | 1 | 2 | 1 | 3 | 4 | 4 | 4 | 3 | 4 | 2 | 4 | 2 | 2 | 1 | 3 | 3 | 1 | 4 | 2 | 17 | 0.88 |
| 223 | 4 | 2 | 4 | 3 | 3 | 2 | 3 | 2 | 4 | 2 | 2 | 1 | 2 | 4 | 2 | 3 | 2 | 3 | 3 | 3 | 2 | 3 | 17 | 0.12 |
| 224 | 4 | 2 | 4 | 4 | 4 | 2 | 2 | 1 | 3 | 3 | 2 | 1 | 2 | 4 | 3 | 4 | 2 | 2 | 2 | 2 | 3 | 3 | 18 | 0.11 |
| 225 | 1 | 3 | 1 | 1 | 1 | 2 | 1 | 1 | 1 | 4 | 3 | 2 | 3 | 1 | 4 | 1 | 2 | 1 | 2 | 4 | 4 | 4 | 18 | 0.44 |
| 226 | 1 | 3 | 1 | 2 | 2 | 2 | 4 | 2 | 2 | 1 | 3 | 2 | 3 | 1 | 1 | 2 | 2 | 4 | 3 | 1 | 1 | 4 | 17 | 0.24 |
| 227 | 2 | 3 | 1 | 2 | 3 | 1 | 4 | 4 | 2 | 3 | 4 | 1 | 3 | 1 | 3 | 3 | 1 | 4 | 3 | 3 | 3 | 3 | 17 | 0.94 |
| 228 | 2 | 3 | 1 | 3 | 4 | 1 | 1 | 1 | 3 | 2 | 4 | 1 | 3 | 1 | 4 | 4 | 1 | 1 | 4 | 4 | 2 | 3 | 18 | 0.94 |
| 229 | 3 | 3 | 2 | 4 | 1 | 3 | 1 | 3 | 2 | 2 | 4 | 2 | 3 | 2 | 1 | 1 | 3 | 1 | 2 | 3 | 2 | 3 | 16 | 0.38 |
| 230 | 2 | 3 | 2 | 2 | 2 | 3 | 4 | 1 | 4 | 3 | 3 | 3 | 3 | 2 | 1 | 2 | 3 | 4 | 2 | 3 | 3 | 4 | 18 | 0.11 |
| 231 | 3 | 3 | 2 | 2 | 3 | 4 | 4 | 1 | 4 | 1 | 4 | 2 | 3 | 2 | 3 | 3 | 4 | 4 | 4 | 1 | 1 | 3 | 18 | 0.94 |
| 232 | 2 | 3 | 2 | 4 | 4 | 4 | 1 | 3 | 2 | 4 | 3 | 3 | 3 | 2 | 3 | 4 | 4 | 1 | 4 | 1 | 4 | 4 | 17 | 0.12 |
| 233 | 3 | 3 | 3 | 1 | 1 | 2 | 2 | 3 | 4 | 1 | 3 | 4 | 3 | 3 | 4 | 1 | 2 | 2 | 4 | 3 | 1 | 4 | 18 | 0.44 |
| 234 | 3 | 3 | 3 | 2 | 2 | 2 | 3 | 4 | 3 | 4 | 3 | 4 | 3 | 3 | 1 | 2 | 2 | 3 | 1 | 2 | 4 | 4 | 16 | 0.25 |
| 235 | 3 | 3 | 3 | 3 | 3 | 1 | 3 | 1 | 2 | 2 | 3 | 4 | 3 | 3 | 2 | 3 | 1 | 3 | 2 | 1 | 2 | 4 | 18 | 0.28 |
| 236 | 4 | 3 | 3 | 3 | 4 | 1 | 2 | 3 | 4 | 3 | 4 | 3 | 3 | 3 | 4 | 4 | 1 | 2 | 2 | 1 | 3 | 3 | 17 | 0.29 |
| 237 | 1 | 3 | 4 | 4 | 1 | 3 | 2 | 1 | 1 | 3 | 4 | 4 | 3 | 4 | 1 | 1 | 3 | 2 | 4 | 2 | 3 | 3 | 19 | 0.74 |
| 238 | 1 | 3 | 4 | 1 | 2 | 3 | 3 | 4 | 4 | 2 | 4 | 4 | 3 | 4 | 2 | 2 | 3 | 3 | 3 | 1 | 2 | 3 | 17 | 0.82 |
| 239 | 1 | 3 | 4 | 2 | 3 | 4 | 3 | 3 | 3 | 4 | 4 | 4 | 3 | 4 | 3 | 3 | 4 | 3 | 2 | 4 | 4 | 3 | 16 | 0.88 |
| 240 | 1 | 3 | 4 | 3 | 4 | 4 | 2 | 2 | 2 | 1 | 4 | 4 | 3 | 4 | 4 | 4 | 4 | 2 | 1 | 3 | 1 | 3 | 16 | 0.88 |
| 241 | 1 | 4 | 1 | 1 | 1 | 2 | 3 | 1 | 1 | 1 | 4 | 2 | 4 | 1 | 4 | 1 | 2 | 3 | 2 | 4 | 1 | 1 | 16 | 0.94 |
| 242 | 2 | 4 | 1 | 1 | 2 | 2 | 2 | 3 | 1 | 4 | 1 | 1 | 4 | 1 | 2 | 2 | 2 | 2 | 2 | 2 | 4 | 4 | 17 | 0.06 |
| 243 | 1 | 4 | 1 | 3 | 3 | 1 | 2 | 3 | 3 | 2 | 4 | 2 | 4 | 1 | 2 | 3 | 1 | 2 | 4 | 2 | 2 | 1 | 18 | 0.89 |
| 244 | 2 | 4 | 1 | 3 | 4 | 1 | 3 | 1 | 3 | 3 | 1 | 1 | 4 | 1 | 4 | 4 | 1 | 3 | 4 | 4 | 3 | 4 | 15 | 0.60 |
| 245 | 2 | 4 | 2 | 1 | 1 | 3 | 3 | 2 | 3 | 3 | 4 | 3 | 4 | 2 | 4 | 1 | 3 | 3 | 3 | 2 | 3 | 1 | 17 | 0.88 |
| 246 | 3 | 4 | 2 | 1 | 2 | 3 | 2 | 2 | 3 | 2 | 1 | 2 | 4 | 2 | 2 | 2 | 3 | 2 | 1 | 4 | 2 | 4 | 18 | 0.28 |
| 247 | 3 | 4 | 2 | 2 | 3 | 4 | 2 | 1 | 4 | 4 | 1 | 2 | 4 | 2 | 3 | 3 | 4 | 2 | 4 | 1 | 4 | 4 | 17 | 0.24 |
| 248 | 2 | 4 | 2 | 4 | 4 | 4 | 3 | 3 | 2 | 1 | 4 | 3 | 4 | 2 | 3 | 4 | 4 | 3 | 4 | 1 | 1 | 1 | 16 | 0.81 |
| 249 | 3 | 4 | 3 | 1 | 1 | 2 | 4 | 3 | 4 | 4 | 4 | 4 | 4 | 3 | 4 | 1 | 2 | 4 | 4 | 3 | 4 | 1 | 17 | 1.00 |
| 250 | 4 | 4 | 3 | 1 | 2 | 2 | 1 | 1 | 2 | 1 | 1 | 3 | 4 | 3 | 2 | 2 | 2 | 1 | 4 | 3 | 1 | 4 | 18 | 0.22 |
| 251 | 3 | 4 | 3 | 3 | 3 | 1 | 1 | 1 | 2 | 3 | 4 | 4 | 4 | 3 | 2 | 3 | 1 | 1 | 2 | 1 | 3 | 1 | 18 | 0.72 |

|     |   |   |   |   |   |   |   |   |   |   |   |   |   |   |   |   |   |   |   |   |   |   |    |      |
|-----|---|---|---|---|---|---|---|---|---|---|---|---|---|---|---|---|---|---|---|---|---|---|----|------|
| 252 | 3 | 4 | 3 | 4 | 4 | 1 | 4 | 2 | 1 | 2 | 4 | 4 | 4 | 3 | 3 | 4 | 1 | 4 | 3 | 4 | 2 | 1 | 18 | 0.83 |
| 253 | 4 | 4 | 4 | 1 | 1 | 3 | 4 | 4 | 2 | 2 | 4 | 1 | 4 | 4 | 4 | 1 | 3 | 4 | 1 | 1 | 2 | 1 | 17 | 0.94 |
| 254 | 1 | 4 | 4 | 1 | 2 | 3 | 1 | 4 | 4 | 3 | 1 | 4 | 4 | 4 | 2 | 2 | 3 | 1 | 3 | 1 | 3 | 4 | 18 | 0.33 |
| 255 | 1 | 4 | 4 | 2 | 3 | 4 | 1 | 3 | 3 | 1 | 1 | 4 | 4 | 4 | 3 | 3 | 4 | 1 | 2 | 4 | 1 | 4 | 18 | 0.22 |
| 256 | 1 | 4 | 4 | 3 | 4 | 4 | 4 | 2 | 2 | 4 | 1 | 4 | 4 | 4 | 4 | 4 | 4 | 4 | 1 | 3 | 4 | 4 | 17 | 0.41 |
| 257 | 2 | 1 | 1 | 1 | 4 | 4 | 3 | 2 | 3 | 4 | 2 | 1 | 1 | 1 | 1 | 4 | 1 | 3 | 1 | 3 | 1 | 1 | 16 | 0.63 |
| 258 | 2 | 1 | 1 | 2 | 4 | 1 | 2 | 3 | 2 | 1 | 2 | 1 | 1 | 1 | 2 | 4 | 2 | 2 | 2 | 2 | 2 | 1 | 17 | 0.88 |
| 259 | 1 | 1 | 1 | 3 | 3 | 3 | 2 | 3 | 4 | 3 | 1 | 2 | 1 | 1 | 3 | 3 | 2 | 2 | 4 | 4 | 2 | 2 | 17 | 0.06 |
| 260 | 2 | 1 | 1 | 4 | 3 | 3 | 3 | 1 | 1 | 3 | 2 | 1 | 1 | 1 | 4 | 3 | 4 | 3 | 4 | 1 | 4 | 1 | 17 | 0.76 |
| 261 | 3 | 1 | 2 | 1 | 1 | 4 | 3 | 3 | 1 | 2 | 2 | 2 | 1 | 2 | 1 | 1 | 1 | 3 | 2 | 1 | 3 | 1 | 18 | 0.78 |
| 262 | 3 | 1 | 2 | 2 | 1 | 1 | 2 | 2 | 4 | 3 | 2 | 2 | 1 | 2 | 2 | 1 | 2 | 2 | 1 | 4 | 4 | 1 | 18 | 0.89 |
| 263 | 3 | 1 | 2 | 3 | 2 | 2 | 2 | 1 | 2 | 4 | 2 | 2 | 1 | 2 | 3 | 2 | 3 | 2 | 4 | 2 | 1 | 1 | 17 | 0.59 |
| 264 | 2 | 1 | 2 | 4 | 2 | 4 | 3 | 3 | 3 | 2 | 1 | 3 | 1 | 2 | 4 | 2 | 3 | 3 | 4 | 3 | 1 | 2 | 17 | 0.18 |
| 265 | 3 | 1 | 3 | 1 | 4 | 1 | 4 | 3 | 2 | 4 | 1 | 4 | 1 | 3 | 1 | 4 | 4 | 4 | 4 | 2 | 3 | 2 | 17 | 0.47 |
| 266 | 3 | 1 | 3 | 2 | 4 | 2 | 1 | 4 | 3 | 3 | 1 | 4 | 1 | 3 | 2 | 4 | 1 | 1 | 1 | 3 | 2 | 2 | 18 | 0.28 |
| 267 | 4 | 1 | 3 | 3 | 3 | 2 | 1 | 2 | 1 | 1 | 2 | 3 | 1 | 3 | 3 | 3 | 3 | 1 | 1 | 1 | 2 | 1 | 17 | 0.82 |
| 268 | 3 | 1 | 3 | 4 | 3 | 4 | 4 | 2 | 4 | 1 | 1 | 4 | 1 | 3 | 4 | 3 | 3 | 4 | 3 | 4 | 4 | 2 | 17 | 0.71 |
| 269 | 1 | 1 | 4 | 1 | 1 | 4 | 4 | 1 | 4 | 1 | 2 | 4 | 1 | 4 | 1 | 1 | 1 | 4 | 4 | 4 | 2 | 1 | 18 | 0.94 |
| 270 | 4 | 1 | 4 | 2 | 1 | 2 | 1 | 3 | 1 | 1 | 1 | 1 | 1 | 4 | 2 | 1 | 1 | 1 | 4 | 1 | 4 | 2 | 17 | 0.12 |
| 271 | 1 | 1 | 4 | 3 | 2 | 2 | 1 | 3 | 3 | 3 | 2 | 4 | 1 | 4 | 3 | 2 | 3 | 1 | 2 | 3 | 4 | 1 | 17 | 0.82 |
| 272 | 4 | 1 | 4 | 4 | 2 | 4 | 4 | 1 | 2 | 3 | 1 | 1 | 1 | 4 | 4 | 2 | 3 | 4 | 2 | 2 | 2 | 2 | 17 | 0.24 |
| 273 | 1 | 2 | 1 | 1 | 4 | 1 | 1 | 1 | 2 | 1 | 2 | 2 | 2 | 1 | 1 | 4 | 4 | 1 | 2 | 2 | 4 | 3 | 17 | 0.53 |
| 274 | 1 | 2 | 1 | 2 | 4 | 2 | 4 | 2 | 3 | 2 | 2 | 2 | 2 | 1 | 2 | 4 | 1 | 4 | 3 | 3 | 1 | 3 | 18 | 0.06 |
| 275 | 1 | 2 | 1 | 3 | 3 | 3 | 4 | 3 | 1 | 3 | 2 | 2 | 2 | 1 | 3 | 3 | 2 | 4 | 4 | 1 | 2 | 3 | 18 | 0.06 |
| 276 | 2 | 2 | 1 | 4 | 3 | 3 | 1 | 1 | 4 | 3 | 3 | 1 | 2 | 1 | 4 | 3 | 4 | 1 | 4 | 4 | 4 | 2 | 17 | 0.94 |
| 277 | 2 | 2 | 2 | 1 | 1 | 1 | 1 | 2 | 4 | 3 | 2 | 3 | 2 | 2 | 1 | 1 | 4 | 1 | 3 | 4 | 2 | 3 | 17 | 0.18 |
| 278 | 3 | 2 | 2 | 2 | 1 | 1 | 4 | 2 | 1 | 3 | 3 | 2 | 2 | 2 | 2 | 1 | 2 | 4 | 1 | 1 | 4 | 2 | 18 | 1.00 |
| 279 | 3 | 2 | 2 | 3 | 2 | 2 | 4 | 1 | 3 | 4 | 3 | 2 | 2 | 2 | 3 | 2 | 3 | 4 | 4 | 3 | 1 | 2 | 16 | 0.50 |
| 280 | 2 | 2 | 2 | 4 | 2 | 4 | 1 | 3 | 2 | 2 | 2 | 3 | 2 | 2 | 4 | 2 | 3 | 1 | 4 | 2 | 1 | 3 | 18 | 0.22 |
| 281 | 3 | 2 | 3 | 1 | 4 | 1 | 2 | 3 | 3 | 4 | 2 | 4 | 2 | 3 | 1 | 4 | 4 | 2 | 4 | 3 | 3 | 3 | 18 | 0.50 |
| 282 | 3 | 2 | 3 | 2 | 4 | 2 | 3 | 4 | 2 | 3 | 2 | 4 | 2 | 3 | 2 | 4 | 1 | 3 | 1 | 2 | 2 | 3 | 17 | 0.12 |
| 283 | 4 | 2 | 3 | 3 | 3 | 2 | 3 | 2 | 4 | 1 | 3 | 3 | 2 | 3 | 3 | 3 | 3 | 3 | 1 | 4 | 2 | 2 | 17 | 0.71 |

|     |   |   |   |   |   |   |   |   |   |   |   |   |   |   |   |   |   |   |   |   |   |   |    |      |
|-----|---|---|---|---|---|---|---|---|---|---|---|---|---|---|---|---|---|---|---|---|---|---|----|------|
| 284 | 4 | 2 | 3 | 4 | 3 | 3 | 2 | 3 | 1 | 4 | 3 | 3 | 2 | 3 | 4 | 3 | 4 | 2 | 2 | 1 | 1 | 2 | 18 | 0.67 |
| 285 | 1 | 2 | 4 | 1 | 1 | 4 | 2 | 1 | 1 | 1 | 3 | 4 | 2 | 4 | 1 | 1 | 1 | 2 | 4 | 1 | 2 | 2 | 16 | 0.88 |
| 286 | 1 | 2 | 4 | 2 | 1 | 1 | 3 | 4 | 4 | 4 | 3 | 4 | 2 | 4 | 2 | 1 | 2 | 3 | 3 | 4 | 1 | 2 | 17 | 0.88 |
| 287 | 4 | 2 | 4 | 3 | 2 | 3 | 3 | 2 | 2 | 4 | 2 | 1 | 2 | 4 | 3 | 2 | 2 | 3 | 3 | 2 | 3 | 3 | 17 | 0.12 |
| 288 | 4 | 2 | 4 | 4 | 2 | 4 | 2 | 1 | 3 | 3 | 2 | 1 | 2 | 4 | 4 | 2 | 3 | 2 | 2 | 3 | 2 | 3 | 18 | 0.11 |
| 289 | 1 | 3 | 1 | 1 | 2 | 1 | 1 | 1 | 4 | 1 | 3 | 2 | 3 | 1 | 1 | 2 | 4 | 1 | 2 | 4 | 4 | 4 | 18 | 0.39 |
| 290 | 1 | 3 | 1 | 2 | 2 | 2 | 4 | 2 | 1 | 2 | 3 | 2 | 3 | 1 | 2 | 2 | 1 | 4 | 3 | 1 | 1 | 4 | 17 | 0.24 |
| 291 | 1 | 3 | 1 | 3 | 1 | 3 | 4 | 3 | 3 | 3 | 3 | 2 | 3 | 1 | 3 | 1 | 2 | 4 | 4 | 3 | 2 | 4 | 17 | 0.29 |
| 292 | 2 | 3 | 1 | 4 | 1 | 3 | 1 | 1 | 2 | 3 | 4 | 1 | 3 | 1 | 4 | 1 | 4 | 1 | 4 | 2 | 4 | 3 | 17 | 0.82 |
| 293 | 2 | 3 | 2 | 1 | 3 | 1 | 1 | 2 | 2 | 3 | 3 | 3 | 3 | 2 | 1 | 3 | 4 | 1 | 3 | 2 | 2 | 4 | 17 | 0.41 |
| 294 | 2 | 3 | 2 | 2 | 3 | 2 | 4 | 1 | 3 | 4 | 3 | 3 | 3 | 2 | 2 | 3 | 1 | 4 | 2 | 3 | 3 | 4 | 16 | 0.06 |
| 295 | 2 | 3 | 2 | 3 | 4 | 3 | 4 | 4 | 1 | 1 | 3 | 3 | 3 | 2 | 3 | 4 | 2 | 4 | 1 | 1 | 4 | 4 | 18 | 0.06 |
| 296 | 3 | 3 | 2 | 4 | 4 | 3 | 1 | 4 | 4 | 1 | 4 | 2 | 3 | 2 | 4 | 4 | 4 | 1 | 3 | 4 | 2 | 3 | 17 | 0.65 |
| 297 | 3 | 3 | 3 | 1 | 2 | 1 | 2 | 3 | 1 | 4 | 3 | 4 | 3 | 3 | 1 | 2 | 4 | 2 | 4 | 1 | 3 | 4 | 18 | 0.33 |
| 298 | 4 | 3 | 3 | 2 | 2 | 1 | 3 | 1 | 4 | 2 | 4 | 3 | 3 | 3 | 2 | 2 | 2 | 3 | 4 | 4 | 3 | 3 | 17 | 0.76 |
| 299 | 4 | 3 | 3 | 3 | 1 | 2 | 3 | 2 | 2 | 1 | 4 | 3 | 3 | 3 | 3 | 1 | 3 | 3 | 1 | 2 | 2 | 3 | 18 | 0.89 |
| 300 | 3 | 3 | 3 | 4 | 1 | 4 | 2 | 2 | 3 | 1 | 3 | 4 | 3 | 3 | 4 | 1 | 3 | 2 | 3 | 3 | 4 | 4 | 16 | 0.38 |
| 301 | 1 | 3 | 4 | 1 | 3 | 4 | 2 | 1 | 3 | 1 | 4 | 4 | 3 | 4 | 1 | 3 | 1 | 2 | 4 | 3 | 2 | 3 | 17 | 0.94 |
| 302 | 1 | 3 | 4 | 2 | 3 | 1 | 3 | 4 | 2 | 4 | 4 | 4 | 3 | 4 | 2 | 3 | 2 | 3 | 3 | 2 | 1 | 3 | 16 | 0.88 |
| 303 | 1 | 3 | 4 | 3 | 4 | 2 | 3 | 3 | 4 | 3 | 4 | 4 | 3 | 4 | 3 | 4 | 3 | 3 | 2 | 4 | 4 | 3 | 16 | 0.88 |
| 304 | 4 | 3 | 4 | 4 | 4 | 4 | 2 | 1 | 1 | 3 | 3 | 1 | 3 | 4 | 4 | 4 | 3 | 2 | 2 | 1 | 2 | 4 | 17 | 0.12 |
| 305 | 2 | 4 | 1 | 1 | 2 | 4 | 3 | 2 | 1 | 4 | 1 | 1 | 4 | 1 | 1 | 2 | 1 | 3 | 1 | 1 | 1 | 4 | 17 | 0.12 |
| 306 | 1 | 4 | 1 | 2 | 2 | 2 | 2 | 2 | 4 | 2 | 4 | 2 | 4 | 1 | 2 | 2 | 1 | 2 | 3 | 4 | 1 | 1 | 17 | 0.88 |
| 307 | 1 | 4 | 1 | 3 | 1 | 3 | 2 | 3 | 2 | 3 | 4 | 2 | 4 | 1 | 3 | 1 | 2 | 2 | 4 | 2 | 2 | 1 | 18 | 0.72 |
| 308 | 1 | 4 | 1 | 4 | 1 | 4 | 3 | 4 | 3 | 4 | 4 | 2 | 4 | 1 | 4 | 1 | 3 | 3 | 1 | 3 | 3 | 1 | 17 | 0.76 |
| 309 | 3 | 4 | 2 | 1 | 3 | 4 | 3 | 3 | 3 | 2 | 1 | 2 | 4 | 2 | 1 | 3 | 1 | 3 | 2 | 3 | 3 | 4 | 18 | 0.06 |
| 310 | 2 | 4 | 2 | 2 | 3 | 2 | 2 | 1 | 2 | 4 | 4 | 3 | 4 | 2 | 2 | 3 | 1 | 2 | 2 | 2 | 3 | 1 | 17 | 0.76 |
| 311 | 2 | 4 | 2 | 3 | 4 | 3 | 2 | 4 | 4 | 1 | 4 | 3 | 4 | 2 | 3 | 4 | 2 | 2 | 1 | 4 | 4 | 1 | 16 | 0.81 |
| 312 | 2 | 4 | 2 | 4 | 4 | 4 | 3 | 3 | 1 | 2 | 4 | 3 | 4 | 2 | 4 | 4 | 3 | 3 | 4 | 1 | 1 | 1 | 17 | 0.71 |
| 313 | 4 | 4 | 3 | 1 | 2 | 4 | 4 | 4 | 4 | 3 | 1 | 3 | 4 | 3 | 1 | 2 | 1 | 4 | 3 | 4 | 4 | 4 | 17 | 0.18 |
| 314 | 3 | 4 | 3 | 2 | 2 | 2 | 1 | 4 | 1 | 3 | 4 | 4 | 4 | 3 | 2 | 2 | 1 | 1 | 1 | 1 | 2 | 1 | 17 | 0.88 |
| 315 | 4 | 4 | 3 | 3 | 1 | 2 | 1 | 2 | 3 | 1 | 1 | 3 | 4 | 3 | 3 | 1 | 3 | 1 | 1 | 3 | 2 | 4 | 17 | 0.00 |

|     |   |   |   |   |   |   |   |   |   |   |   |   |   |   |   |   |   |   |   |   |   |   |    |      |
|-----|---|---|---|---|---|---|---|---|---|---|---|---|---|---|---|---|---|---|---|---|---|---|----|------|
| 316 | 4 | 4 | 3 | 4 | 1 | 3 | 4 | 3 | 2 | 4 | 1 | 3 | 4 | 3 | 4 | 1 | 4 | 4 | 2 | 2 | 1 | 4 | 18 | 0.17 |
| 317 | 1 | 4 | 4 | 1 | 3 | 4 | 4 | 1 | 2 | 1 | 1 | 4 | 4 | 4 | 1 | 3 | 1 | 4 | 4 | 2 | 2 | 4 | 18 | 0.28 |
| 318 | 1 | 4 | 4 | 2 | 3 | 1 | 1 | 4 | 3 | 4 | 1 | 4 | 4 | 4 | 2 | 3 | 2 | 1 | 3 | 3 | 1 | 4 | 18 | 0.17 |
| 319 | 4 | 4 | 4 | 3 | 4 | 3 | 1 | 2 | 1 | 4 | 4 | 1 | 4 | 4 | 3 | 4 | 2 | 1 | 3 | 1 | 3 | 1 | 18 | 0.72 |
| 320 | 1 | 4 | 4 | 4 | 4 | 3 | 4 | 2 | 4 | 2 | 1 | 4 | 4 | 4 | 4 | 4 | 4 | 4 | 1 | 4 | 3 | 4 | 17 | 0.53 |
| 321 | 2 | 1 | 1 | 1 | 4 | 3 | 4 | 3 | 2 | 4 | 2 | 1 | 1 | 1 | 1 | 4 | 3 | 1 | 3 | 1 | 1 | 1 | 16 | 0.56 |
| 322 | 2 | 1 | 1 | 2 | 4 | 2 | 1 | 2 | 3 | 1 | 2 | 1 | 1 | 1 | 2 | 4 | 2 | 2 | 2 | 2 | 2 | 1 | 17 | 0.82 |
| 323 | 2 | 1 | 1 | 3 | 3 | 2 | 2 | 4 | 4 | 2 | 2 | 1 | 1 | 1 | 3 | 3 | 2 | 3 | 4 | 3 | 3 | 1 | 17 | 0.88 |
| 324 | 1 | 1 | 1 | 4 | 3 | 3 | 4 | 1 | 4 | 4 | 1 | 2 | 1 | 1 | 4 | 3 | 3 | 3 | 1 | 1 | 3 | 2 | 18 | 0.11 |
| 325 | 3 | 1 | 2 | 1 | 1 | 3 | 4 | 1 | 3 | 2 | 2 | 2 | 1 | 2 | 1 | 1 | 3 | 1 | 1 | 2 | 3 | 1 | 18 | 0.67 |
| 326 | 2 | 1 | 2 | 2 | 1 | 2 | 2 | 4 | 1 | 4 | 1 | 3 | 1 | 2 | 2 | 1 | 2 | 1 | 4 | 2 | 3 | 2 | 17 | 0.12 |
| 327 | 3 | 1 | 2 | 3 | 2 | 2 | 2 | 2 | 1 | 4 | 2 | 2 | 1 | 2 | 3 | 2 | 2 | 3 | 2 | 4 | 1 | 1 | 18 | 0.94 |
| 328 | 3 | 1 | 2 | 4 | 2 | 3 | 3 | 3 | 4 | 1 | 2 | 2 | 1 | 2 | 4 | 2 | 3 | 4 | 3 | 3 | 2 | 1 | 15 | 0.80 |
| 329 | 4 | 1 | 3 | 1 | 4 | 4 | 4 | 2 | 4 | 3 | 2 | 3 | 1 | 3 | 1 | 4 | 4 | 1 | 2 | 3 | 4 | 1 | 17 | 0.53 |
| 330 | 4 | 1 | 3 | 2 | 4 | 1 | 1 | 3 | 1 | 2 | 2 | 3 | 1 | 3 | 2 | 4 | 1 | 2 | 3 | 4 | 3 | 1 | 19 | 1.00 |
| 331 | 4 | 1 | 3 | 3 | 3 | 1 | 2 | 1 | 2 | 1 | 2 | 3 | 1 | 3 | 3 | 3 | 1 | 3 | 1 | 1 | 2 | 1 | 17 | 0.59 |
| 332 | 3 | 1 | 3 | 4 | 3 | 4 | 4 | 4 | 2 | 1 | 1 | 4 | 1 | 3 | 4 | 3 | 4 | 3 | 4 | 3 | 4 | 2 | 17 | 0.59 |
| 333 | 4 | 1 | 4 | 1 | 1 | 4 | 1 | 4 | 4 | 2 | 1 | 1 | 1 | 4 | 1 | 1 | 4 | 4 | 4 | 1 | 1 | 2 | 18 | 0.17 |
| 334 | 4 | 1 | 4 | 2 | 1 | 1 | 2 | 1 | 3 | 1 | 1 | 1 | 1 | 4 | 2 | 1 | 1 | 1 | 1 | 4 | 4 | 2 | 17 | 0.18 |
| 335 | 1 | 1 | 4 | 3 | 2 | 1 | 2 | 3 | 3 | 3 | 2 | 4 | 1 | 4 | 3 | 2 | 1 | 3 | 3 | 2 | 4 | 1 | 16 | 0.81 |
| 336 | 4 | 1 | 4 | 4 | 2 | 4 | 4 | 2 | 1 | 3 | 1 | 1 | 1 | 4 | 4 | 2 | 4 | 3 | 2 | 2 | 2 | 2 | 16 | 0.06 |
| 337 | 2 | 2 | 1 | 1 | 4 | 1 | 4 | 2 | 2 | 4 | 3 | 1 | 2 | 1 | 1 | 4 | 1 | 1 | 2 | 1 | 1 | 2 | 17 | 0.76 |
| 338 | 2 | 2 | 1 | 2 | 4 | 4 | 1 | 3 | 3 | 1 | 3 | 1 | 2 | 1 | 2 | 4 | 4 | 2 | 3 | 2 | 2 | 2 | 17 | 0.88 |
| 339 | 2 | 2 | 1 | 3 | 3 | 4 | 2 | 1 | 4 | 2 | 3 | 1 | 2 | 1 | 3 | 3 | 4 | 3 | 1 | 3 | 3 | 2 | 18 | 0.89 |
| 340 | 2 | 2 | 1 | 4 | 3 | 1 | 3 | 4 | 1 | 3 | 3 | 1 | 2 | 1 | 4 | 3 | 1 | 4 | 4 | 4 | 4 | 2 | 19 | 0.89 |
| 341 | 3 | 2 | 2 | 1 | 1 | 1 | 4 | 4 | 3 | 2 | 3 | 2 | 2 | 2 | 1 | 1 | 1 | 1 | 4 | 2 | 3 | 2 | 17 | 0.82 |
| 342 | 3 | 2 | 2 | 2 | 1 | 4 | 1 | 1 | 2 | 3 | 3 | 2 | 2 | 2 | 2 | 1 | 4 | 2 | 1 | 1 | 4 | 2 | 18 | 0.89 |
| 343 | 3 | 2 | 2 | 3 | 2 | 4 | 2 | 3 | 1 | 4 | 3 | 2 | 2 | 2 | 3 | 2 | 4 | 3 | 3 | 4 | 1 | 2 | 17 | 0.94 |
| 344 | 2 | 2 | 2 | 4 | 2 | 1 | 4 | 2 | 3 | 2 | 2 | 3 | 2 | 2 | 4 | 2 | 1 | 3 | 2 | 4 | 1 | 3 | 17 | 0.24 |
| 345 | 3 | 2 | 3 | 1 | 4 | 2 | 1 | 3 | 3 | 4 | 2 | 4 | 2 | 3 | 1 | 4 | 2 | 4 | 3 | 4 | 3 | 3 | 17 | 0.35 |
| 346 | 3 | 2 | 3 | 2 | 4 | 3 | 2 | 2 | 4 | 3 | 2 | 4 | 2 | 3 | 2 | 4 | 3 | 1 | 2 | 1 | 2 | 3 | 16 | 0.19 |
| 347 | 4 | 2 | 3 | 3 | 3 | 3 | 2 | 4 | 2 | 1 | 3 | 3 | 2 | 3 | 3 | 3 | 3 | 3 | 4 | 1 | 2 | 2 | 17 | 0.88 |

|     |   |   |   |   |   |   |   |   |   |   |   |   |   |   |   |   |   |   |   |   |   |   |    |      |
|-----|---|---|---|---|---|---|---|---|---|---|---|---|---|---|---|---|---|---|---|---|---|---|----|------|
| 348 | 3 | 2 | 3 | 4 | 3 | 2 | 4 | 1 | 2 | 1 | 2 | 4 | 2 | 3 | 4 | 3 | 2 | 3 | 1 | 3 | 4 | 3 | 17 | 0.59 |
| 349 | 1 | 2 | 4 | 1 | 1 | 2 | 4 | 1 | 1 | 1 | 3 | 4 | 2 | 4 | 1 | 1 | 2 | 1 | 1 | 4 | 2 | 2 | 17 | 0.82 |
| 350 | 4 | 2 | 4 | 2 | 1 | 3 | 2 | 4 | 3 | 1 | 2 | 1 | 2 | 4 | 2 | 1 | 3 | 1 | 4 | 4 | 4 | 3 | 17 | 0.29 |
| 351 | 4 | 2 | 4 | 3 | 2 | 3 | 3 | 2 | 2 | 4 | 2 | 1 | 2 | 4 | 3 | 2 | 3 | 2 | 2 | 3 | 3 | 3 | 15 | 0.07 |
| 352 | 1 | 2 | 4 | 4 | 2 | 2 | 3 | 3 | 2 | 2 | 3 | 4 | 2 | 4 | 4 | 2 | 2 | 4 | 3 | 1 | 3 | 2 | 18 | 0.83 |
| 353 | 2 | 3 | 1 | 1 | 2 | 1 | 4 | 4 | 2 | 4 | 4 | 1 | 3 | 1 | 1 | 2 | 1 | 1 | 4 | 1 | 1 | 3 | 16 | 0.38 |
| 354 | 2 | 3 | 1 | 2 | 2 | 4 | 1 | 1 | 3 | 1 | 4 | 1 | 3 | 1 | 2 | 2 | 4 | 2 | 1 | 2 | 2 | 3 | 19 | 0.79 |
| 355 | 1 | 3 | 1 | 3 | 1 | 4 | 3 | 3 | 3 | 3 | 3 | 2 | 3 | 1 | 3 | 1 | 4 | 2 | 3 | 4 | 2 | 4 | 17 | 0.24 |
| 356 | 1 | 3 | 1 | 4 | 1 | 1 | 4 | 2 | 4 | 4 | 3 | 2 | 3 | 1 | 4 | 1 | 1 | 3 | 2 | 1 | 3 | 4 | 16 | 0.13 |
| 357 | 2 | 3 | 2 | 1 | 3 | 1 | 1 | 2 | 2 | 3 | 3 | 3 | 3 | 2 | 1 | 3 | 1 | 4 | 2 | 3 | 2 | 4 | 18 | 0.33 |
| 358 | 3 | 3 | 2 | 2 | 3 | 4 | 1 | 3 | 2 | 3 | 4 | 2 | 3 | 2 | 2 | 3 | 4 | 2 | 3 | 1 | 4 | 3 | 15 | 0.67 |
| 359 | 2 | 3 | 2 | 3 | 4 | 4 | 3 | 1 | 4 | 1 | 3 | 3 | 3 | 2 | 3 | 4 | 4 | 2 | 1 | 1 | 4 | 4 | 16 | 0.25 |
| 360 | 2 | 3 | 2 | 4 | 4 | 1 | 4 | 4 | 3 | 2 | 3 | 3 | 3 | 2 | 4 | 4 | 1 | 3 | 4 | 4 | 1 | 4 | 17 | 0.29 |
| 361 | 3 | 3 | 3 | 1 | 2 | 2 | 1 | 1 | 3 | 4 | 3 | 4 | 3 | 3 | 1 | 2 | 2 | 4 | 1 | 4 | 3 | 4 | 17 | 0.29 |
| 362 | 3 | 3 | 3 | 2 | 2 | 3 | 2 | 4 | 4 | 3 | 3 | 4 | 3 | 3 | 2 | 2 | 3 | 1 | 4 | 1 | 2 | 4 | 18 | 0.28 |
| 363 | 3 | 3 | 3 | 3 | 1 | 3 | 3 | 2 | 1 | 2 | 3 | 4 | 3 | 3 | 3 | 1 | 3 | 2 | 2 | 2 | 1 | 4 | 16 | 0.25 |
| 364 | 3 | 3 | 3 | 4 | 1 | 2 | 4 | 3 | 2 | 1 | 3 | 4 | 3 | 3 | 4 | 1 | 2 | 3 | 3 | 3 | 4 | 4 | 17 | 0.47 |
| 365 | 4 | 3 | 4 | 1 | 3 | 2 | 1 | 3 | 4 | 2 | 3 | 1 | 3 | 4 | 1 | 3 | 2 | 4 | 3 | 1 | 1 | 4 | 17 | 0.06 |
| 366 | 1 | 3 | 4 | 2 | 3 | 3 | 1 | 2 | 4 | 4 | 4 | 4 | 3 | 4 | 2 | 3 | 3 | 2 | 2 | 3 | 1 | 3 | 17 | 0.88 |
| 367 | 1 | 3 | 4 | 3 | 4 | 3 | 2 | 4 | 3 | 3 | 4 | 4 | 3 | 4 | 3 | 4 | 3 | 3 | 4 | 2 | 4 | 3 | 17 | 0.88 |
| 368 | 4 | 3 | 4 | 4 | 4 | 2 | 4 | 1 | 1 | 3 | 3 | 1 | 3 | 4 | 4 | 4 | 2 | 3 | 1 | 2 | 2 | 4 | 17 | 0.00 |
| 369 | 2 | 4 | 1 | 1 | 2 | 3 | 4 | 1 | 2 | 4 | 1 | 1 | 4 | 1 | 1 | 2 | 3 | 1 | 1 | 1 | 1 | 4 | 16 | 0.13 |
| 370 | 1 | 4 | 1 | 2 | 2 | 2 | 2 | 4 | 2 | 2 | 4 | 2 | 4 | 1 | 2 | 2 | 2 | 1 | 4 | 3 | 1 | 1 | 17 | 0.94 |
| 371 | 1 | 4 | 1 | 3 | 1 | 2 | 3 | 2 | 3 | 3 | 4 | 2 | 4 | 1 | 3 | 1 | 2 | 2 | 2 | 4 | 2 | 1 | 17 | 0.76 |
| 372 | 1 | 4 | 1 | 4 | 1 | 3 | 4 | 3 | 4 | 4 | 4 | 2 | 4 | 1 | 4 | 1 | 3 | 3 | 3 | 1 | 3 | 1 | 16 | 0.75 |
| 373 | 2 | 4 | 2 | 1 | 3 | 3 | 1 | 3 | 2 | 3 | 4 | 3 | 4 | 2 | 1 | 3 | 3 | 4 | 3 | 3 | 2 | 1 | 17 | 0.82 |
| 374 | 3 | 4 | 2 | 2 | 3 | 2 | 1 | 2 | 2 | 3 | 1 | 2 | 4 | 2 | 2 | 3 | 2 | 2 | 2 | 1 | 4 | 4 | 16 | 0.13 |
| 375 | 3 | 4 | 2 | 3 | 4 | 2 | 2 | 4 | 1 | 4 | 1 | 2 | 4 | 2 | 3 | 4 | 2 | 3 | 4 | 4 | 1 | 4 | 18 | 0.11 |
| 376 | 3 | 4 | 2 | 4 | 4 | 3 | 3 | 1 | 4 | 1 | 1 | 2 | 4 | 2 | 4 | 4 | 3 | 4 | 1 | 3 | 2 | 4 | 16 | 0.19 |
| 377 | 3 | 4 | 3 | 1 | 2 | 4 | 1 | 4 | 3 | 4 | 4 | 4 | 4 | 3 | 1 | 2 | 4 | 4 | 4 | 4 | 3 | 1 | 17 | 0.82 |
| 378 | 4 | 4 | 3 | 2 | 2 | 1 | 1 | 1 | 1 | 2 | 1 | 3 | 4 | 3 | 2 | 2 | 1 | 2 | 1 | 4 | 3 | 4 | 17 | 0.29 |
| 379 | 4 | 4 | 3 | 3 | 1 | 1 | 2 | 3 | 2 | 1 | 1 | 3 | 4 | 3 | 3 | 1 | 1 | 3 | 3 | 1 | 2 | 4 | 17 | 0.06 |

|     |   |   |   |   |   |   |   |   |   |   |   |   |   |   |   |   |   |   |   |   |   |   |    |      |
|-----|---|---|---|---|---|---|---|---|---|---|---|---|---|---|---|---|---|---|---|---|---|---|----|------|
| 380 | 3 | 4 | 3 | 4 | 1 | 4 | 4 | 2 | 2 | 1 | 4 | 4 | 4 | 3 | 4 | 1 | 4 | 3 | 2 | 3 | 4 | 1 | 17 | 0.88 |
| 381 | 1 | 4 | 4 | 1 | 3 | 4 | 4 | 2 | 1 | 1 | 1 | 4 | 4 | 4 | 1 | 3 | 4 | 1 | 2 | 4 | 2 | 4 | 16 | 0.13 |
| 382 | 1 | 4 | 4 | 2 | 3 | 1 | 1 | 3 | 4 | 4 | 1 | 4 | 4 | 4 | 2 | 3 | 1 | 2 | 3 | 3 | 1 | 4 | 17 | 0.06 |
| 383 | 4 | 4 | 4 | 3 | 4 | 1 | 3 | 1 | 2 | 4 | 4 | 1 | 4 | 4 | 3 | 4 | 1 | 2 | 1 | 3 | 3 | 1 | 17 | 0.76 |
| 384 | 4 | 4 | 4 | 4 | 4 | 4 | 4 | 4 | 1 | 3 | 4 | 1 | 4 | 4 | 4 | 4 | 4 | 3 | 4 | 2 | 2 | 1 | 18 | 0.83 |
| 385 | 1 | 2 | 4 | 1 | 1 | 4 | 3 | 2 | 4 | 3 | 2 | 1 | 1 | 1 | 1 | 1 | 4 | 3 | 1 | 1 | 3 | 1 | 17 | 0.53 |
| 386 | 1 | 2 | 1 | 1 | 2 | 4 | 2 | 3 | 1 | 2 | 2 | 1 | 1 | 2 | 1 | 2 | 4 | 2 | 2 | 2 | 2 | 1 | 16 | 0.88 |
| 387 | 1 | 1 | 3 | 1 | 3 | 3 | 2 | 3 | 3 | 4 | 1 | 1 | 2 | 2 | 1 | 3 | 3 | 2 | 4 | 2 | 4 | 2 | 17 | 0.12 |
| 388 | 1 | 1 | 4 | 1 | 4 | 3 | 3 | 4 | 4 | 1 | 1 | 1 | 2 | 3 | 1 | 4 | 3 | 3 | 1 | 3 | 1 | 2 | 17 | 0.18 |
| 389 | 1 | 2 | 1 | 2 | 1 | 1 | 3 | 2 | 3 | 1 | 1 | 1 | 3 | 4 | 2 | 1 | 1 | 3 | 3 | 2 | 1 | 2 | 17 | 0.53 |
| 390 | 1 | 2 | 2 | 2 | 2 | 1 | 2 | 1 | 4 | 4 | 1 | 1 | 3 | 1 | 2 | 2 | 1 | 2 | 2 | 3 | 4 | 2 | 18 | 0.17 |
| 391 | 1 | 2 | 3 | 2 | 3 | 2 | 2 | 4 | 1 | 2 | 1 | 1 | 3 | 2 | 2 | 3 | 2 | 2 | 1 | 4 | 2 | 2 | 17 | 0.24 |
| 392 | 1 | 2 | 4 | 2 | 4 | 2 | 3 | 3 | 2 | 3 | 1 | 1 | 3 | 3 | 2 | 4 | 2 | 3 | 4 | 1 | 3 | 2 | 17 | 0.41 |
| 393 | 1 | 4 | 4 | 3 | 1 | 4 | 4 | 4 | 3 | 2 | 2 | 1 | 3 | 1 | 3 | 1 | 4 | 4 | 3 | 4 | 2 | 1 | 18 | 0.56 |
| 394 | 1 | 4 | 1 | 3 | 2 | 4 | 1 | 1 | 2 | 3 | 2 | 1 | 3 | 2 | 3 | 2 | 4 | 1 | 4 | 3 | 3 | 1 | 17 | 0.88 |
| 395 | 1 | 4 | 2 | 3 | 3 | 3 | 1 | 2 | 1 | 1 | 2 | 1 | 3 | 3 | 3 | 3 | 3 | 1 | 1 | 2 | 1 | 1 | 17 | 0.76 |
| 396 | 1 | 3 | 4 | 3 | 4 | 3 | 4 | 2 | 1 | 4 | 1 | 1 | 4 | 3 | 3 | 4 | 3 | 4 | 3 | 4 | 4 | 2 | 17 | 0.47 |
| 397 | 1 | 4 | 1 | 4 | 1 | 1 | 4 | 4 | 2 | 4 | 1 | 1 | 1 | 4 | 4 | 1 | 1 | 4 | 1 | 1 | 4 | 2 | 18 | 0.22 |
| 398 | 1 | 1 | 1 | 4 | 2 | 1 | 1 | 4 | 4 | 1 | 2 | 1 | 4 | 2 | 4 | 2 | 1 | 1 | 3 | 1 | 1 | 1 | 18 | 0.83 |
| 399 | 1 | 1 | 2 | 4 | 3 | 2 | 1 | 3 | 3 | 3 | 2 | 1 | 4 | 3 | 4 | 3 | 2 | 1 | 2 | 4 | 3 | 1 | 17 | 0.82 |
| 400 | 1 | 4 | 4 | 4 | 4 | 2 | 4 | 1 | 3 | 2 | 1 | 1 | 1 | 3 | 4 | 4 | 2 | 4 | 2 | 2 | 2 | 2 | 18 | 0.17 |
| 401 | 2 | 2 | 4 | 1 | 1 | 4 | 1 | 2 | 4 | 2 | 3 | 2 | 1 | 1 | 1 | 1 | 4 | 1 | 1 | 1 | 2 | 2 | 18 | 0.44 |
| 402 | 2 | 2 | 1 | 1 | 2 | 4 | 4 | 3 | 1 | 3 | 3 | 2 | 1 | 2 | 1 | 2 | 4 | 4 | 2 | 2 | 3 | 2 | 17 | 0.76 |
| 403 | 2 | 2 | 2 | 1 | 3 | 3 | 4 | 4 | 2 | 1 | 3 | 2 | 1 | 3 | 1 | 3 | 3 | 4 | 3 | 3 | 1 | 2 | 18 | 1.00 |
| 404 | 2 | 2 | 3 | 1 | 4 | 3 | 1 | 1 | 3 | 4 | 3 | 2 | 1 | 4 | 1 | 4 | 3 | 1 | 4 | 4 | 4 | 2 | 18 | 0.94 |
| 405 | 2 | 2 | 1 | 2 | 1 | 1 | 1 | 2 | 3 | 4 | 2 | 2 | 3 | 4 | 2 | 1 | 1 | 1 | 3 | 2 | 4 | 3 | 17 | 0.18 |
| 406 | 2 | 3 | 1 | 2 | 2 | 1 | 4 | 2 | 3 | 1 | 3 | 2 | 2 | 2 | 2 | 2 | 1 | 4 | 1 | 4 | 1 | 2 | 17 | 0.82 |
| 407 | 2 | 3 | 2 | 2 | 3 | 2 | 4 | 1 | 4 | 3 | 3 | 2 | 2 | 3 | 2 | 3 | 2 | 4 | 4 | 1 | 3 | 2 | 16 | 0.63 |
| 408 | 2 | 3 | 3 | 2 | 4 | 2 | 1 | 4 | 1 | 2 | 3 | 2 | 2 | 4 | 2 | 4 | 2 | 1 | 3 | 2 | 2 | 2 | 16 | 0.88 |
| 409 | 2 | 3 | 1 | 3 | 1 | 4 | 2 | 3 | 4 | 3 | 2 | 2 | 4 | 4 | 3 | 1 | 4 | 2 | 4 | 3 | 3 | 3 | 18 | 0.22 |
| 410 | 2 | 3 | 2 | 3 | 2 | 4 | 3 | 4 | 3 | 2 | 2 | 2 | 4 | 1 | 3 | 2 | 4 | 3 | 1 | 2 | 2 | 3 | 16 | 0.13 |
| 411 | 2 | 4 | 2 | 3 | 3 | 3 | 3 | 2 | 1 | 4 | 3 | 2 | 3 | 3 | 3 | 3 | 3 | 3 | 1 | 2 | 4 | 2 | 16 | 0.94 |

|     |   |   |   |   |   |   |   |   |   |   |   |   |   |   |   |   |   |   |   |   |   |   |    |      |
|-----|---|---|---|---|---|---|---|---|---|---|---|---|---|---|---|---|---|---|---|---|---|---|----|------|
| 412 | 2 | 4 | 3 | 3 | 4 | 3 | 2 | 3 | 4 | 1 | 3 | 2 | 3 | 4 | 3 | 4 | 3 | 2 | 2 | 1 | 1 | 2 | 16 | 0.69 |
| 413 | 2 | 4 | 1 | 4 | 1 | 1 | 2 | 4 | 2 | 1 | 2 | 2 | 1 | 4 | 4 | 1 | 1 | 2 | 1 | 1 | 1 | 3 | 17 | 0.24 |
| 414 | 2 | 1 | 1 | 4 | 2 | 1 | 3 | 4 | 4 | 4 | 3 | 2 | 4 | 2 | 4 | 2 | 1 | 3 | 3 | 1 | 4 | 2 | 18 | 0.89 |
| 415 | 2 | 4 | 3 | 4 | 3 | 2 | 3 | 2 | 4 | 2 | 2 | 2 | 1 | 2 | 4 | 3 | 2 | 3 | 3 | 3 | 2 | 3 | 17 | 0.18 |
| 416 | 2 | 4 | 4 | 4 | 4 | 2 | 2 | 1 | 3 | 3 | 2 | 2 | 1 | 3 | 4 | 4 | 2 | 2 | 2 | 2 | 3 | 3 | 18 | 0.06 |
| 417 | 3 | 2 | 4 | 1 | 1 | 2 | 1 | 2 | 4 | 4 | 4 | 3 | 1 | 1 | 1 | 1 | 2 | 1 | 1 | 1 | 4 | 3 | 18 | 0.61 |
| 418 | 3 | 1 | 2 | 1 | 2 | 2 | 4 | 2 | 2 | 1 | 3 | 3 | 2 | 1 | 1 | 2 | 2 | 4 | 3 | 1 | 1 | 4 | 17 | 0.24 |
| 419 | 3 | 1 | 3 | 1 | 3 | 1 | 4 | 3 | 3 | 3 | 3 | 3 | 2 | 2 | 1 | 3 | 1 | 4 | 4 | 2 | 3 | 4 | 16 | 0.25 |
| 420 | 3 | 1 | 4 | 1 | 4 | 1 | 1 | 4 | 4 | 2 | 3 | 3 | 2 | 3 | 1 | 4 | 1 | 1 | 1 | 3 | 2 | 4 | 17 | 0.18 |
| 421 | 3 | 3 | 4 | 2 | 1 | 3 | 1 | 3 | 2 | 2 | 4 | 3 | 2 | 1 | 2 | 1 | 3 | 1 | 2 | 3 | 2 | 3 | 16 | 0.50 |
| 422 | 3 | 2 | 2 | 2 | 2 | 3 | 4 | 1 | 4 | 3 | 3 | 3 | 3 | 1 | 2 | 2 | 3 | 4 | 2 | 3 | 3 | 4 | 17 | 0.12 |
| 423 | 3 | 3 | 2 | 2 | 3 | 4 | 4 | 1 | 4 | 1 | 4 | 3 | 2 | 3 | 2 | 3 | 4 | 4 | 4 | 1 | 1 | 3 | 16 | 0.75 |
| 424 | 3 | 2 | 4 | 2 | 4 | 4 | 1 | 3 | 2 | 4 | 3 | 3 | 3 | 3 | 2 | 4 | 4 | 1 | 4 | 1 | 4 | 4 | 18 | 0.33 |
| 425 | 3 | 4 | 4 | 3 | 1 | 2 | 2 | 4 | 3 | 1 | 4 | 3 | 3 | 1 | 3 | 1 | 2 | 2 | 3 | 4 | 1 | 3 | 18 | 0.56 |
| 426 | 3 | 4 | 1 | 3 | 2 | 2 | 3 | 1 | 2 | 4 | 4 | 3 | 3 | 2 | 3 | 2 | 2 | 3 | 4 | 3 | 4 | 3 | 18 | 0.94 |
| 427 | 3 | 3 | 3 | 3 | 3 | 1 | 3 | 1 | 2 | 2 | 3 | 3 | 4 | 2 | 3 | 3 | 1 | 3 | 2 | 1 | 2 | 4 | 17 | 0.12 |
| 428 | 3 | 3 | 4 | 3 | 4 | 1 | 2 | 2 | 1 | 3 | 3 | 3 | 4 | 3 | 3 | 4 | 1 | 2 | 3 | 4 | 3 | 4 | 18 | 0.44 |
| 429 | 3 | 1 | 4 | 4 | 1 | 3 | 2 | 1 | 1 | 3 | 4 | 3 | 4 | 1 | 4 | 1 | 3 | 2 | 4 | 2 | 3 | 3 | 17 | 0.82 |
| 430 | 3 | 4 | 2 | 4 | 2 | 3 | 3 | 3 | 1 | 2 | 3 | 3 | 1 | 1 | 4 | 2 | 3 | 3 | 4 | 4 | 2 | 4 | 17 | 0.24 |
| 431 | 3 | 4 | 3 | 4 | 3 | 4 | 3 | 2 | 4 | 4 | 3 | 3 | 1 | 2 | 4 | 3 | 4 | 3 | 3 | 3 | 4 | 4 | 17 | 0.24 |
| 432 | 3 | 1 | 3 | 4 | 4 | 4 | 2 | 2 | 2 | 1 | 4 | 3 | 4 | 4 | 4 | 4 | 4 | 2 | 1 | 3 | 1 | 3 | 17 | 0.71 |
| 433 | 4 | 2 | 4 | 1 | 1 | 2 | 3 | 2 | 4 | 1 | 1 | 4 | 1 | 1 | 1 | 1 | 2 | 3 | 1 | 1 | 1 | 4 | 17 | 0.00 |
| 434 | 4 | 2 | 1 | 1 | 2 | 2 | 2 | 3 | 1 | 4 | 1 | 4 | 1 | 2 | 1 | 2 | 2 | 2 | 2 | 2 | 4 | 4 | 18 | 0.22 |
| 435 | 4 | 1 | 3 | 1 | 3 | 1 | 2 | 3 | 3 | 2 | 4 | 4 | 2 | 2 | 1 | 3 | 1 | 2 | 4 | 2 | 2 | 1 | 18 | 0.78 |
| 436 | 4 | 1 | 4 | 1 | 4 | 1 | 3 | 4 | 4 | 3 | 4 | 4 | 2 | 3 | 1 | 4 | 1 | 3 | 1 | 3 | 3 | 1 | 17 | 0.82 |
| 437 | 4 | 2 | 1 | 2 | 1 | 3 | 3 | 2 | 3 | 3 | 4 | 4 | 3 | 4 | 2 | 1 | 3 | 3 | 3 | 2 | 3 | 1 | 18 | 0.89 |
| 438 | 4 | 3 | 1 | 2 | 2 | 3 | 2 | 2 | 3 | 2 | 1 | 4 | 2 | 2 | 2 | 2 | 3 | 2 | 1 | 4 | 2 | 4 | 18 | 0.11 |
| 439 | 4 | 2 | 3 | 2 | 3 | 4 | 2 | 4 | 1 | 4 | 4 | 4 | 3 | 2 | 2 | 3 | 4 | 2 | 1 | 4 | 4 | 1 | 18 | 0.83 |
| 440 | 4 | 3 | 3 | 2 | 4 | 4 | 3 | 4 | 1 | 1 | 1 | 4 | 2 | 4 | 2 | 4 | 4 | 3 | 3 | 2 | 1 | 4 | 18 | 0.06 |
| 441 | 4 | 4 | 4 | 3 | 1 | 2 | 4 | 4 | 3 | 4 | 1 | 4 | 3 | 1 | 3 | 1 | 2 | 4 | 3 | 4 | 4 | 4 | 18 | 0.17 |
| 442 | 4 | 4 | 1 | 3 | 2 | 2 | 1 | 1 | 2 | 1 | 1 | 4 | 3 | 2 | 3 | 2 | 2 | 1 | 4 | 3 | 1 | 4 | 18 | 0.17 |
| 443 | 4 | 3 | 3 | 3 | 3 | 1 | 1 | 1 | 2 | 3 | 4 | 4 | 4 | 2 | 3 | 3 | 1 | 1 | 2 | 1 | 3 | 1 | 17 | 0.65 |

|     |   |   |   |   |   |   |   |   |   |   |   |   |   |   |   |   |   |   |   |   |   |   |    |      |
|-----|---|---|---|---|---|---|---|---|---|---|---|---|---|---|---|---|---|---|---|---|---|---|----|------|
| 444 | 4 | 3 | 4 | 3 | 4 | 1 | 4 | 2 | 1 | 2 | 4 | 4 | 4 | 3 | 3 | 4 | 1 | 4 | 3 | 4 | 2 | 1 | 18 | 0.83 |
| 445 | 4 | 1 | 4 | 4 | 1 | 3 | 4 | 1 | 1 | 2 | 1 | 4 | 4 | 1 | 4 | 1 | 3 | 4 | 4 | 2 | 2 | 4 | 18 | 0.17 |
| 446 | 4 | 4 | 2 | 4 | 2 | 3 | 1 | 3 | 1 | 3 | 4 | 4 | 1 | 1 | 4 | 2 | 3 | 1 | 4 | 4 | 3 | 1 | 18 | 0.56 |
| 447 | 4 | 1 | 2 | 4 | 3 | 4 | 1 | 3 | 3 | 1 | 1 | 4 | 4 | 3 | 4 | 3 | 4 | 1 | 2 | 4 | 1 | 4 | 17 | 0.47 |
| 448 | 4 | 4 | 4 | 4 | 4 | 4 | 4 | 1 | 3 | 4 | 4 | 4 | 1 | 3 | 4 | 4 | 4 | 4 | 2 | 2 | 4 | 1 | 18 | 0.67 |
| 449 | 1 | 2 | 1 | 4 | 1 | 4 | 2 | 3 | 3 | 4 | 2 | 1 | 1 | 1 | 1 | 1 | 4 | 1 | 3 | 3 | 1 | 1 | 17 | 0.47 |
| 450 | 1 | 1 | 1 | 2 | 2 | 4 | 2 | 2 | 2 | 2 | 1 | 1 | 2 | 1 | 1 | 2 | 4 | 3 | 2 | 2 | 1 | 2 | 17 | 0.41 |
| 451 | 1 | 1 | 1 | 3 | 3 | 3 | 3 | 2 | 4 | 3 | 1 | 1 | 2 | 1 | 2 | 3 | 3 | 4 | 2 | 4 | 2 | 2 | 17 | 0.18 |
| 452 | 1 | 1 | 1 | 4 | 4 | 3 | 4 | 3 | 1 | 4 | 1 | 1 | 2 | 1 | 3 | 4 | 3 | 1 | 3 | 1 | 3 | 2 | 18 | 0.06 |
| 453 | 1 | 3 | 2 | 4 | 1 | 1 | 3 | 3 | 1 | 2 | 2 | 1 | 2 | 2 | 1 | 1 | 1 | 2 | 3 | 1 | 3 | 1 | 17 | 0.59 |
| 454 | 1 | 2 | 2 | 2 | 2 | 1 | 1 | 2 | 4 | 4 | 1 | 1 | 3 | 2 | 1 | 2 | 1 | 2 | 2 | 4 | 3 | 2 | 18 | 0.44 |
| 455 | 1 | 2 | 2 | 3 | 3 | 2 | 4 | 2 | 2 | 1 | 1 | 1 | 3 | 2 | 2 | 3 | 2 | 1 | 2 | 2 | 4 | 2 | 17 | 0.29 |
| 456 | 1 | 3 | 2 | 3 | 4 | 2 | 4 | 3 | 3 | 1 | 2 | 1 | 2 | 2 | 4 | 4 | 2 | 3 | 3 | 3 | 2 | 1 | 17 | 0.82 |
| 457 | 1 | 3 | 3 | 1 | 1 | 4 | 3 | 4 | 2 | 4 | 1 | 1 | 4 | 3 | 4 | 1 | 4 | 4 | 4 | 2 | 3 | 2 | 17 | 0.35 |
| 458 | 1 | 4 | 3 | 1 | 2 | 4 | 1 | 1 | 3 | 2 | 2 | 1 | 3 | 3 | 2 | 2 | 4 | 4 | 1 | 3 | 3 | 1 | 18 | 0.83 |
| 459 | 1 | 3 | 3 | 3 | 3 | 3 | 1 | 1 | 1 | 2 | 1 | 1 | 4 | 3 | 2 | 3 | 3 | 2 | 1 | 1 | 1 | 2 | 18 | 0.11 |
| 460 | 1 | 3 | 3 | 4 | 4 | 3 | 2 | 4 | 4 | 1 | 1 | 1 | 4 | 3 | 3 | 4 | 3 | 3 | 4 | 4 | 4 | 2 | 18 | 0.39 |
| 461 | 1 | 4 | 4 | 1 | 1 | 1 | 4 | 4 | 4 | 2 | 1 | 1 | 1 | 4 | 4 | 1 | 1 | 1 | 4 | 4 | 1 | 2 | 16 | 0.44 |
| 462 | 1 | 1 | 4 | 1 | 2 | 1 | 4 | 1 | 1 | 4 | 2 | 1 | 4 | 4 | 2 | 2 | 1 | 3 | 1 | 1 | 1 | 1 | 18 | 0.89 |
| 463 | 1 | 1 | 4 | 2 | 3 | 2 | 3 | 1 | 3 | 3 | 2 | 1 | 4 | 4 | 3 | 3 | 2 | 2 | 1 | 3 | 4 | 1 | 17 | 0.94 |
| 464 | 1 | 4 | 4 | 4 | 4 | 2 | 1 | 4 | 2 | 3 | 1 | 1 | 1 | 4 | 3 | 4 | 2 | 2 | 4 | 2 | 2 | 2 | 18 | 0.11 |
| 465 | 2 | 1 | 1 | 1 | 1 | 4 | 1 | 1 | 2 | 1 | 2 | 2 | 2 | 1 | 4 | 1 | 4 | 2 | 1 | 2 | 4 | 3 | 17 | 0.29 |
| 466 | 2 | 1 | 1 | 2 | 2 | 4 | 2 | 4 | 3 | 2 | 2 | 2 | 2 | 1 | 1 | 2 | 4 | 3 | 4 | 3 | 1 | 3 | 18 | 0.28 |
| 467 | 2 | 2 | 1 | 2 | 3 | 3 | 4 | 4 | 1 | 2 | 3 | 2 | 1 | 1 | 3 | 3 | 3 | 3 | 4 | 1 | 3 | 2 | 18 | 0.78 |
| 468 | 2 | 1 | 1 | 4 | 4 | 3 | 4 | 1 | 4 | 4 | 2 | 2 | 2 | 1 | 3 | 4 | 3 | 1 | 1 | 4 | 3 | 3 | 17 | 0.18 |
| 469 | 2 | 2 | 2 | 1 | 1 | 1 | 2 | 1 | 4 | 3 | 2 | 2 | 3 | 2 | 4 | 1 | 1 | 3 | 1 | 4 | 2 | 3 | 16 | 0.06 |
| 470 | 2 | 3 | 2 | 1 | 2 | 1 | 2 | 4 | 1 | 3 | 3 | 2 | 2 | 2 | 2 | 2 | 1 | 1 | 4 | 1 | 4 | 2 | 16 | 0.75 |
| 471 | 2 | 3 | 2 | 2 | 3 | 2 | 1 | 4 | 3 | 4 | 3 | 2 | 2 | 2 | 3 | 3 | 2 | 4 | 4 | 3 | 1 | 2 | 18 | 0.78 |
| 472 | 2 | 2 | 2 | 4 | 4 | 2 | 3 | 1 | 2 | 2 | 2 | 2 | 3 | 2 | 3 | 4 | 2 | 4 | 1 | 2 | 1 | 3 | 16 | 0.19 |
| 473 | 2 | 3 | 3 | 1 | 1 | 4 | 3 | 2 | 3 | 4 | 2 | 2 | 4 | 3 | 4 | 1 | 4 | 4 | 2 | 3 | 3 | 3 | 18 | 0.39 |
| 474 | 2 | 3 | 3 | 2 | 2 | 4 | 4 | 3 | 2 | 3 | 2 | 2 | 4 | 3 | 1 | 2 | 4 | 1 | 3 | 2 | 2 | 3 | 16 | 0.13 |
| 475 | 2 | 4 | 3 | 2 | 3 | 3 | 2 | 3 | 4 | 1 | 3 | 2 | 3 | 3 | 3 | 3 | 3 | 1 | 3 | 4 | 2 | 2 | 18 | 0.89 |



|     |   |   |   |   |   |   |   |   |   |   |   |   |   |   |   |   |   |   |   |   |   |   |    |      |
|-----|---|---|---|---|---|---|---|---|---|---|---|---|---|---|---|---|---|---|---|---|---|---|----|------|
| 476 | 2 | 4 | 3 | 3 | 4 | 3 | 3 | 2 | 1 | 4 | 3 | 2 | 3 | 3 | 4 | 4 | 3 | 2 | 2 | 1 | 1 | 2 | 17 | 0.76 |
| 477 | 2 | 1 | 4 | 4 | 1 | 1 | 1 | 2 | 1 | 1 | 3 | 2 | 4 | 4 | 1 | 1 | 1 | 4 | 2 | 1 | 2 | 2 | 17 | 0.71 |
| 478 | 2 | 1 | 4 | 1 | 2 | 1 | 4 | 3 | 4 | 4 | 3 | 2 | 4 | 4 | 2 | 2 | 1 | 3 | 3 | 4 | 1 | 2 | 17 | 0.65 |
| 479 | 2 | 1 | 4 | 2 | 3 | 2 | 3 | 3 | 2 | 3 | 3 | 2 | 4 | 4 | 3 | 3 | 2 | 2 | 3 | 2 | 4 | 2 | 16 | 0.88 |
| 480 | 2 | 4 | 4 | 4 | 4 | 2 | 1 | 2 | 3 | 3 | 2 | 2 | 1 | 4 | 3 | 4 | 2 | 2 | 2 | 3 | 2 | 3 | 17 | 0.12 |
| 481 | 3 | 1 | 1 | 1 | 1 | 2 | 1 | 1 | 4 | 1 | 3 | 3 | 2 | 1 | 4 | 1 | 2 | 2 | 1 | 4 | 4 | 4 | 17 | 0.65 |
| 482 | 3 | 1 | 1 | 2 | 2 | 2 | 2 | 4 | 1 | 2 | 3 | 3 | 2 | 1 | 1 | 2 | 2 | 3 | 4 | 1 | 1 | 4 | 17 | 0.18 |
| 483 | 3 | 1 | 1 | 3 | 3 | 1 | 3 | 4 | 3 | 3 | 3 | 3 | 2 | 1 | 2 | 3 | 1 | 4 | 4 | 3 | 2 | 4 | 18 | 0.11 |
| 484 | 3 | 2 | 1 | 3 | 4 | 1 | 1 | 1 | 2 | 3 | 4 | 3 | 1 | 1 | 4 | 4 | 1 | 4 | 1 | 2 | 4 | 3 | 16 | 0.94 |
| 485 | 3 | 3 | 2 | 4 | 1 | 3 | 3 | 1 | 2 | 2 | 4 | 3 | 2 | 2 | 1 | 1 | 3 | 2 | 1 | 2 | 3 | 3 | 18 | 0.39 |
| 486 | 3 | 3 | 2 | 1 | 2 | 3 | 2 | 4 | 3 | 3 | 4 | 3 | 2 | 2 | 2 | 2 | 3 | 1 | 4 | 3 | 4 | 3 | 17 | 0.82 |
| 487 | 3 | 2 | 2 | 3 | 3 | 4 | 4 | 4 | 1 | 1 | 3 | 3 | 3 | 2 | 2 | 3 | 4 | 1 | 4 | 1 | 4 | 4 | 18 | 0.33 |
| 488 | 3 | 3 | 2 | 3 | 4 | 4 | 4 | 1 | 4 | 1 | 4 | 3 | 2 | 2 | 4 | 4 | 4 | 3 | 1 | 4 | 2 | 3 | 18 | 0.72 |
| 489 | 3 | 3 | 3 | 1 | 1 | 2 | 3 | 2 | 1 | 4 | 3 | 3 | 4 | 3 | 4 | 1 | 2 | 4 | 2 | 1 | 3 | 4 | 17 | 0.41 |
| 490 | 3 | 4 | 3 | 1 | 2 | 2 | 1 | 3 | 4 | 2 | 4 | 3 | 3 | 3 | 2 | 2 | 2 | 4 | 3 | 4 | 3 | 3 | 17 | 0.88 |
| 491 | 3 | 3 | 3 | 3 | 3 | 1 | 1 | 3 | 2 | 2 | 3 | 3 | 4 | 3 | 2 | 3 | 1 | 2 | 3 | 2 | 1 | 4 | 17 | 0.18 |
| 492 | 3 | 4 | 3 | 3 | 4 | 1 | 3 | 2 | 3 | 4 | 4 | 3 | 3 | 3 | 4 | 4 | 1 | 2 | 2 | 3 | 1 | 3 | 18 | 0.61 |
| 493 | 3 | 1 | 4 | 4 | 1 | 3 | 1 | 2 | 3 | 1 | 4 | 3 | 4 | 4 | 1 | 1 | 3 | 4 | 2 | 3 | 2 | 3 | 16 | 0.88 |
| 494 | 3 | 1 | 4 | 1 | 2 | 3 | 4 | 3 | 2 | 4 | 4 | 3 | 4 | 4 | 2 | 2 | 3 | 3 | 3 | 2 | 1 | 3 | 18 | 0.67 |
| 495 | 3 | 4 | 4 | 3 | 3 | 4 | 2 | 3 | 4 | 4 | 3 | 3 | 1 | 4 | 2 | 3 | 4 | 3 | 3 | 4 | 3 | 4 | 16 | 0.00 |
| 496 | 3 | 4 | 4 | 4 | 4 | 4 | 1 | 2 | 1 | 3 | 3 | 3 | 1 | 4 | 3 | 4 | 4 | 2 | 2 | 1 | 2 | 4 | 18 | 0.06 |
| 497 | 4 | 2 | 1 | 4 | 1 | 2 | 2 | 3 | 1 | 4 | 1 | 4 | 1 | 1 | 1 | 1 | 2 | 1 | 3 | 1 | 1 | 4 | 17 | 0.18 |
| 498 | 4 | 1 | 1 | 2 | 2 | 2 | 2 | 2 | 4 | 2 | 4 | 4 | 2 | 1 | 1 | 2 | 2 | 3 | 2 | 4 | 1 | 1 | 19 | 0.79 |
| 499 | 4 | 1 | 1 | 3 | 3 | 1 | 3 | 2 | 2 | 3 | 4 | 4 | 2 | 1 | 2 | 3 | 1 | 4 | 2 | 2 | 2 | 1 | 17 | 0.82 |
| 500 | 4 | 2 | 1 | 3 | 4 | 1 | 1 | 3 | 3 | 3 | 1 | 4 | 1 | 1 | 4 | 4 | 1 | 4 | 3 | 3 | 4 | 4 | 18 | 0.61 |
| 501 | 4 | 3 | 2 | 4 | 1 | 3 | 3 | 3 | 3 | 2 | 1 | 4 | 2 | 2 | 1 | 1 | 3 | 2 | 3 | 3 | 3 | 4 | 17 | 0.06 |
| 502 | 4 | 3 | 2 | 1 | 2 | 3 | 2 | 2 | 2 | 3 | 1 | 4 | 2 | 2 | 2 | 2 | 3 | 1 | 2 | 2 | 4 | 4 | 17 | 0.29 |
| 503 | 4 | 2 | 2 | 3 | 3 | 4 | 4 | 2 | 4 | 1 | 4 | 4 | 3 | 2 | 2 | 3 | 4 | 1 | 2 | 4 | 4 | 1 | 19 | 0.84 |
| 504 | 4 | 2 | 2 | 4 | 4 | 4 | 3 | 3 | 1 | 2 | 4 | 4 | 3 | 2 | 3 | 4 | 4 | 4 | 3 | 1 | 1 | 1 | 17 | 0.94 |
| 505 | 4 | 4 | 3 | 4 | 1 | 2 | 4 | 4 | 4 | 3 | 1 | 4 | 3 | 3 | 1 | 1 | 2 | 3 | 4 | 4 | 4 | 4 | 17 | 0.12 |
| 506 | 4 | 3 | 3 | 2 | 2 | 2 | 4 | 1 | 1 | 3 | 4 | 4 | 4 | 3 | 1 | 2 | 2 | 1 | 1 | 1 | 2 | 1 | 16 | 0.75 |
| 507 | 4 | 4 | 3 | 2 | 3 | 1 | 2 | 1 | 3 | 1 | 1 | 4 | 3 | 3 | 3 | 3 | 1 | 1 | 1 | 3 | 2 | 4 | 18 | 0.22 |

|     |   |   |   |   |   |   |   |   |   |   |   |   |   |   |   |   |   |   |   |   |   |    |      |      |
|-----|---|---|---|---|---|---|---|---|---|---|---|---|---|---|---|---|---|---|---|---|---|----|------|------|
| 508 | 4 | 3 | 3 | 4 | 4 | 1 | 2 | 4 | 2 | 1 | 4 | 4 | 4 | 3 | 3 | 4 | 1 | 3 | 4 | 2 | 4 | 1  | 17   | 0.82 |
| 509 | 4 | 1 | 4 | 4 | 1 | 3 | 1 | 4 | 2 | 1 | 1 | 4 | 4 | 4 | 1 | 1 | 3 | 4 | 4 | 2 | 2 | 4  | 16   | 0.19 |
| 510 | 4 | 1 | 4 | 1 | 2 | 3 | 4 | 1 | 3 | 4 | 1 | 4 | 4 | 4 | 2 | 2 | 3 | 3 | 1 | 3 | 1 | 4  | 16   | 0.31 |
| 511 | 4 | 4 | 4 | 3 | 3 | 4 | 2 | 1 | 1 | 4 | 4 | 4 | 1 | 4 | 2 | 3 | 4 | 3 | 1 | 1 | 3 | 1  | 17   | 0.94 |
| 512 | 4 | 1 | 4 | 3 | 4 | 4 | 2 | 4 | 4 | 2 | 1 | 4 | 4 | 4 | 4 | 4 | 1 | 4 | 4 | 3 | 4 | 17 | 0.41 |      |
| 513 | 1 | 1 | 1 | 1 | 1 | 4 | 3 | 1 | 3 | 1 | 1 | 1 | 2 | 1 | 1 | 4 | 4 | 3 | 2 | 3 | 4 | 2  | 16   | 0.63 |
| 514 | 1 | 1 | 1 | 2 | 2 | 4 | 2 | 2 | 2 | 2 | 1 | 1 | 2 | 1 | 2 | 1 | 4 | 2 | 3 | 2 | 1 | 2  | 18   | 0.22 |
| 515 | 1 | 2 | 1 | 3 | 2 | 3 | 2 | 4 | 4 | 2 | 2 | 1 | 1 | 1 | 3 | 3 | 3 | 2 | 3 | 4 | 3 | 1  | 17   | 0.82 |
| 516 | 1 | 2 | 1 | 4 | 3 | 3 | 3 | 1 | 1 | 3 | 2 | 1 | 1 | 1 | 4 | 4 | 3 | 3 | 4 | 1 | 4 | 1  | 18   | 0.78 |
| 517 | 1 | 3 | 2 | 1 | 4 | 1 | 3 | 3 | 1 | 2 | 2 | 1 | 2 | 2 | 1 | 1 | 1 | 3 | 2 | 1 | 3 | 1  | 18   | 0.67 |
| 518 | 1 | 2 | 2 | 2 | 2 | 1 | 2 | 1 | 4 | 4 | 1 | 1 | 3 | 2 | 2 | 1 | 1 | 2 | 2 | 4 | 3 | 2  | 19   | 0.21 |
| 519 | 1 | 3 | 2 | 3 | 2 | 2 | 2 | 1 | 2 | 4 | 2 | 1 | 2 | 2 | 3 | 3 | 2 | 2 | 4 | 2 | 1 | 1  | 18   | 0.72 |
| 520 | 1 | 3 | 2 | 4 | 3 | 2 | 3 | 4 | 3 | 1 | 2 | 1 | 2 | 2 | 4 | 4 | 2 | 3 | 3 | 3 | 2 | 1  | 17   | 0.71 |
| 521 | 1 | 3 | 3 | 1 | 1 | 4 | 4 | 3 | 2 | 4 | 1 | 1 | 4 | 3 | 1 | 4 | 4 | 4 | 4 | 2 | 3 | 2  | 18   | 0.56 |
| 522 | 1 | 3 | 3 | 2 | 2 | 4 | 1 | 4 | 3 | 3 | 1 | 1 | 4 | 3 | 2 | 1 | 4 | 1 | 1 | 3 | 2 | 2  | 17   | 0.18 |
| 523 | 1 | 3 | 3 | 3 | 3 | 3 | 1 | 1 | 1 | 2 | 1 | 1 | 4 | 3 | 3 | 2 | 3 | 1 | 2 | 1 | 1 | 2  | 17   | 0.24 |
| 524 | 1 | 3 | 3 | 4 | 4 | 3 | 4 | 2 | 4 | 1 | 1 | 1 | 4 | 3 | 4 | 3 | 3 | 4 | 3 | 4 | 4 | 2  | 16   | 0.38 |
| 525 | 1 | 1 | 4 | 1 | 4 | 1 | 4 | 1 | 4 | 1 | 2 | 1 | 4 | 4 | 1 | 1 | 1 | 4 | 4 | 4 | 2 | 1  | 17   | 0.88 |
| 526 | 1 | 4 | 4 | 2 | 2 | 1 | 1 | 3 | 1 | 1 | 1 | 1 | 1 | 4 | 2 | 1 | 1 | 1 | 4 | 1 | 4 | 2  | 17   | 0.35 |
| 527 | 1 | 4 | 4 | 3 | 3 | 2 | 1 | 2 | 3 | 4 | 1 | 1 | 1 | 4 | 3 | 2 | 2 | 1 | 3 | 3 | 3 | 2  | 18   | 0.06 |
| 528 | 1 | 1 | 4 | 4 | 3 | 2 | 4 | 2 | 2 | 2 | 2 | 1 | 4 | 4 | 4 | 4 | 2 | 4 | 1 | 2 | 3 | 1  | 18   | 0.94 |
| 529 | 2 | 1 | 1 | 1 | 1 | 4 | 1 | 1 | 2 | 1 | 2 | 2 | 2 | 1 | 1 | 4 | 4 | 1 | 2 | 2 | 4 | 3  | 18   | 0.56 |
| 530 | 2 | 1 | 1 | 2 | 2 | 4 | 4 | 2 | 3 | 2 | 2 | 2 | 2 | 1 | 2 | 1 | 4 | 4 | 3 | 3 | 1 | 3  | 17   | 0.12 |
| 531 | 2 | 2 | 1 | 3 | 2 | 3 | 4 | 4 | 1 | 2 | 3 | 2 | 1 | 1 | 3 | 3 | 3 | 4 | 3 | 1 | 3 | 2  | 17   | 0.88 |
| 532 | 2 | 2 | 1 | 4 | 3 | 3 | 1 | 1 | 4 | 3 | 3 | 2 | 1 | 1 | 4 | 4 | 3 | 1 | 4 | 4 | 4 | 2  | 17   | 0.88 |
| 533 | 2 | 3 | 2 | 1 | 4 | 1 | 1 | 3 | 4 | 2 | 3 | 2 | 2 | 2 | 1 | 1 | 1 | 1 | 2 | 4 | 3 | 2  | 17   | 0.59 |
| 534 | 2 | 3 | 2 | 2 | 1 | 1 | 4 | 2 | 1 | 3 | 3 | 2 | 2 | 2 | 2 | 2 | 1 | 4 | 1 | 1 | 4 | 2  | 17   | 0.82 |
| 535 | 2 | 2 | 2 | 3 | 3 | 2 | 4 | 4 | 3 | 1 | 2 | 2 | 3 | 2 | 3 | 2 | 2 | 4 | 1 | 3 | 4 | 3  | 16   | 0.19 |
| 536 | 2 | 3 | 2 | 4 | 3 | 2 | 1 | 4 | 2 | 1 | 3 | 2 | 2 | 2 | 4 | 4 | 2 | 1 | 3 | 2 | 2 | 2  | 16   | 0.75 |
| 537 | 2 | 3 | 3 | 1 | 1 | 4 | 2 | 3 | 3 | 4 | 2 | 2 | 4 | 3 | 1 | 4 | 4 | 2 | 4 | 3 | 3 | 3  | 16   | 0.31 |
| 538 | 2 | 3 | 3 | 2 | 2 | 4 | 3 | 4 | 2 | 3 | 2 | 2 | 4 | 3 | 2 | 1 | 4 | 3 | 1 | 2 | 2 | 3  | 17   | 0.18 |
| 539 | 2 | 3 | 3 | 3 | 3 | 3 | 3 | 1 | 4 | 2 | 2 | 2 | 4 | 3 | 3 | 2 | 3 | 3 | 2 | 4 | 1 | 3  | 18   | 0.28 |

|     |   |   |   |   |   |   |   |   |   |   |   |   |   |   |   |   |   |   |   |   |   |   |    |      |
|-----|---|---|---|---|---|---|---|---|---|---|---|---|---|---|---|---|---|---|---|---|---|---|----|------|
| 540 | 2 | 3 | 3 | 4 | 4 | 3 | 2 | 2 | 1 | 1 | 2 | 2 | 4 | 3 | 4 | 3 | 3 | 2 | 3 | 1 | 4 | 3 | 18 | 0.28 |
| 541 | 2 | 4 | 4 | 1 | 1 | 1 | 2 | 4 | 1 | 2 | 2 | 2 | 1 | 4 | 1 | 4 | 1 | 2 | 1 | 1 | 1 | 3 | 16 | 0.25 |
| 542 | 2 | 1 | 4 | 2 | 1 | 1 | 3 | 4 | 4 | 4 | 3 | 2 | 4 | 4 | 2 | 2 | 1 | 3 | 3 | 4 | 1 | 2 | 15 | 0.60 |
| 543 | 2 | 4 | 4 | 3 | 3 | 2 | 3 | 2 | 2 | 4 | 2 | 2 | 1 | 4 | 3 | 2 | 2 | 3 | 3 | 2 | 3 | 3 | 16 | 0.25 |
| 544 | 2 | 1 | 4 | 4 | 3 | 2 | 2 | 2 | 3 | 2 | 3 | 2 | 4 | 4 | 4 | 4 | 2 | 2 | 1 | 3 | 3 | 2 | 18 | 0.78 |
| 545 | 3 | 2 | 1 | 1 | 4 | 2 | 1 | 2 | 4 | 4 | 4 | 3 | 1 | 1 | 1 | 1 | 2 | 1 | 1 | 4 | 1 | 3 | 17 | 0.41 |
| 546 | 3 | 2 | 1 | 2 | 1 | 2 | 4 | 3 | 1 | 1 | 4 | 3 | 1 | 1 | 2 | 2 | 2 | 4 | 2 | 1 | 2 | 3 | 17 | 0.88 |
| 547 | 3 | 1 | 1 | 3 | 3 | 1 | 4 | 3 | 3 | 3 | 3 | 3 | 2 | 1 | 3 | 2 | 1 | 4 | 4 | 3 | 2 | 4 | 18 | 0.06 |
| 548 | 3 | 1 | 1 | 4 | 4 | 1 | 1 | 4 | 2 | 4 | 3 | 3 | 2 | 1 | 4 | 3 | 1 | 1 | 1 | 2 | 3 | 4 | 16 | 0.13 |
| 549 | 3 | 2 | 2 | 1 | 1 | 3 | 1 | 2 | 2 | 3 | 3 | 3 | 3 | 2 | 1 | 4 | 3 | 1 | 3 | 2 | 2 | 4 | 19 | 0.47 |
| 550 | 3 | 3 | 2 | 2 | 1 | 3 | 4 | 2 | 3 | 3 | 4 | 3 | 2 | 2 | 2 | 2 | 3 | 4 | 1 | 3 | 4 | 3 | 18 | 0.89 |
| 551 | 3 | 3 | 2 | 3 | 2 | 4 | 4 | 1 | 1 | 4 | 4 | 3 | 2 | 2 | 3 | 3 | 4 | 4 | 4 | 1 | 1 | 3 | 18 | 0.94 |
| 552 | 3 | 3 | 2 | 4 | 3 | 4 | 1 | 4 | 4 | 1 | 4 | 3 | 2 | 2 | 4 | 4 | 4 | 1 | 3 | 4 | 2 | 3 | 16 | 0.50 |
| 553 | 3 | 3 | 3 | 1 | 1 | 2 | 2 | 3 | 1 | 4 | 3 | 3 | 4 | 3 | 1 | 4 | 2 | 2 | 4 | 1 | 3 | 4 | 17 | 0.82 |
| 554 | 3 | 4 | 3 | 2 | 1 | 2 | 3 | 1 | 4 | 2 | 4 | 3 | 3 | 3 | 2 | 2 | 2 | 3 | 4 | 4 | 3 | 3 | 16 | 0.75 |
| 555 | 3 | 4 | 3 | 3 | 2 | 1 | 3 | 2 | 2 | 1 | 4 | 3 | 3 | 3 | 3 | 3 | 1 | 3 | 1 | 2 | 2 | 3 | 18 | 0.83 |
| 556 | 3 | 3 | 3 | 4 | 4 | 1 | 2 | 2 | 3 | 1 | 3 | 3 | 4 | 3 | 4 | 3 | 1 | 2 | 3 | 3 | 4 | 4 | 18 | 0.61 |
| 557 | 3 | 4 | 4 | 1 | 1 | 3 | 2 | 4 | 3 | 2 | 3 | 3 | 1 | 4 | 1 | 4 | 3 | 2 | 1 | 3 | 1 | 4 | 17 | 0.06 |
| 558 | 3 | 1 | 4 | 2 | 1 | 3 | 3 | 4 | 2 | 4 | 4 | 3 | 4 | 4 | 2 | 2 | 3 | 3 | 3 | 2 | 1 | 3 | 18 | 0.94 |
| 559 | 3 | 1 | 4 | 3 | 2 | 4 | 3 | 3 | 4 | 3 | 4 | 3 | 4 | 4 | 3 | 3 | 4 | 3 | 2 | 4 | 4 | 3 | 18 | 0.83 |
| 560 | 3 | 1 | 4 | 4 | 3 | 4 | 2 | 2 | 1 | 2 | 4 | 3 | 4 | 4 | 4 | 4 | 4 | 2 | 1 | 1 | 3 | 3 | 16 | 0.94 |
| 561 | 4 | 2 | 1 | 1 | 4 | 2 | 3 | 2 | 1 | 4 | 1 | 4 | 1 | 1 | 1 | 1 | 2 | 3 | 1 | 1 | 1 | 4 | 18 | 0.11 |
| 562 | 4 | 1 | 1 | 2 | 2 | 2 | 2 | 2 | 4 | 2 | 4 | 4 | 2 | 1 | 2 | 1 | 2 | 2 | 3 | 4 | 1 | 1 | 16 | 1.00 |
| 563 | 4 | 2 | 1 | 3 | 2 | 1 | 2 | 4 | 2 | 2 | 1 | 4 | 1 | 1 | 3 | 3 | 1 | 2 | 3 | 2 | 3 | 4 | 16 | 0.31 |
| 564 | 4 | 1 | 1 | 4 | 4 | 1 | 3 | 4 | 3 | 4 | 4 | 4 | 2 | 1 | 4 | 3 | 1 | 3 | 1 | 3 | 3 | 1 | 19 | 0.89 |
| 565 | 4 | 2 | 2 | 1 | 1 | 3 | 3 | 2 | 3 | 3 | 4 | 4 | 3 | 2 | 1 | 4 | 3 | 3 | 3 | 3 | 2 | 1 | 18 | 0.94 |
| 566 | 4 | 3 | 2 | 2 | 1 | 3 | 2 | 2 | 2 | 3 | 1 | 4 | 2 | 2 | 2 | 2 | 3 | 2 | 1 | 2 | 4 | 4 | 16 | 0.06 |
| 567 | 4 | 3 | 2 | 3 | 2 | 4 | 2 | 1 | 4 | 4 | 1 | 4 | 2 | 2 | 3 | 3 | 4 | 2 | 4 | 4 | 1 | 4 | 18 | 0.22 |
| 568 | 4 | 3 | 2 | 4 | 3 | 4 | 3 | 4 | 1 | 1 | 1 | 4 | 2 | 2 | 4 | 4 | 4 | 3 | 3 | 1 | 2 | 4 | 17 | 0.47 |
| 569 | 4 | 3 | 3 | 1 | 1 | 2 | 4 | 3 | 4 | 4 | 4 | 4 | 4 | 3 | 1 | 4 | 2 | 4 | 4 | 4 | 3 | 1 | 17 | 0.88 |
| 570 | 4 | 4 | 3 | 2 | 1 | 2 | 1 | 1 | 1 | 2 | 1 | 4 | 3 | 3 | 2 | 2 | 2 | 1 | 4 | 1 | 3 | 4 | 17 | 0.18 |
| 571 | 4 | 4 | 3 | 3 | 2 | 1 | 1 | 2 | 3 | 1 | 1 | 4 | 3 | 3 | 3 | 3 | 1 | 1 | 1 | 3 | 2 | 4 | 17 | 0.24 |

|     |   |   |   |   |   |   |   |   |   |   |   |   |   |   |   |   |   |   |   |   |   |   |    |      |
|-----|---|---|---|---|---|---|---|---|---|---|---|---|---|---|---|---|---|---|---|---|---|---|----|------|
| 572 | 4 | 3 | 3 | 4 | 4 | 1 | 4 | 2 | 2 | 1 | 4 | 4 | 4 | 3 | 4 | 3 | 1 | 4 | 3 | 2 | 4 | 1 | 18 | 0.78 |
| 573 | 4 | 4 | 4 | 1 | 1 | 3 | 4 | 4 | 2 | 2 | 4 | 4 | 1 | 4 | 1 | 4 | 3 | 4 | 1 | 2 | 1 | 1 | 17 | 0.76 |
| 574 | 4 | 1 | 4 | 2 | 1 | 3 | 1 | 4 | 3 | 4 | 1 | 4 | 4 | 4 | 2 | 2 | 3 | 1 | 3 | 3 | 1 | 4 | 17 | 0.29 |
| 575 | 4 | 4 | 4 | 3 | 3 | 4 | 1 | 2 | 1 | 4 | 4 | 4 | 1 | 4 | 3 | 2 | 4 | 1 | 3 | 1 | 3 | 1 | 17 | 0.59 |
| 576 | 4 | 1 | 4 | 4 | 3 | 4 | 4 | 2 | 4 | 2 | 1 | 4 | 4 | 4 | 4 | 4 | 4 | 4 | 1 | 4 | 3 | 4 | 17 | 0.41 |
| 577 | 1 | 1 | 1 | 1 | 4 | 1 | 1 | 3 | 1 | 3 | 1 | 1 | 2 | 1 | 1 | 4 | 4 | 2 | 3 | 4 | 3 | 2 | 17 | 0.71 |
| 578 | 1 | 1 | 1 | 2 | 4 | 2 | 2 | 2 | 2 | 2 | 1 | 1 | 2 | 1 | 2 | 4 | 1 | 3 | 2 | 1 | 2 | 2 | 15 | 0.40 |
| 579 | 1 | 1 | 1 | 3 | 3 | 3 | 3 | 2 | 3 | 4 | 1 | 1 | 2 | 1 | 3 | 3 | 2 | 4 | 2 | 2 | 4 | 2 | 17 | 0.06 |
| 580 | 1 | 2 | 1 | 4 | 3 | 3 | 1 | 3 | 3 | 1 | 2 | 1 | 1 | 1 | 4 | 3 | 4 | 4 | 3 | 4 | 1 | 1 | 17 | 0.71 |
| 581 | 1 | 2 | 2 | 1 | 1 | 1 | 2 | 3 | 3 | 1 | 1 | 1 | 3 | 2 | 1 | 1 | 4 | 3 | 3 | 2 | 1 | 2 | 17 | 0.41 |
| 582 | 1 | 2 | 2 | 2 | 1 | 2 | 1 | 2 | 4 | 4 | 1 | 1 | 3 | 2 | 2 | 1 | 1 | 2 | 2 | 3 | 4 | 2 | 16 | 0.44 |
| 583 | 1 | 2 | 2 | 3 | 2 | 3 | 4 | 2 | 1 | 2 | 1 | 1 | 3 | 2 | 3 | 2 | 2 | 1 | 2 | 4 | 2 | 2 | 15 | 0.47 |
| 584 | 1 | 2 | 2 | 4 | 2 | 4 | 3 | 3 | 2 | 3 | 1 | 1 | 3 | 2 | 4 | 2 | 3 | 4 | 3 | 1 | 3 | 2 | 17 | 0.47 |
| 585 | 1 | 3 | 3 | 1 | 4 | 1 | 3 | 4 | 4 | 2 | 1 | 1 | 4 | 3 | 1 | 4 | 4 | 4 | 4 | 3 | 2 | 2 | 18 | 0.50 |
| 586 | 1 | 4 | 3 | 2 | 4 | 1 | 1 | 1 | 2 | 3 | 2 | 1 | 3 | 3 | 2 | 4 | 2 | 4 | 1 | 3 | 3 | 1 | 18 | 0.94 |
| 587 | 1 | 3 | 3 | 3 | 3 | 3 | 1 | 1 | 2 | 1 | 1 | 1 | 4 | 3 | 3 | 3 | 2 | 2 | 1 | 1 | 1 | 2 | 17 | 0.24 |
| 588 | 1 | 3 | 3 | 4 | 3 | 4 | 2 | 4 | 1 | 4 | 1 | 1 | 4 | 3 | 4 | 3 | 3 | 3 | 4 | 4 | 4 | 2 | 17 | 0.65 |
| 589 | 1 | 1 | 4 | 1 | 1 | 4 | 1 | 4 | 1 | 4 | 2 | 1 | 4 | 4 | 1 | 1 | 1 | 4 | 4 | 2 | 4 | 1 | 17 | 0.82 |
| 590 | 1 | 4 | 4 | 2 | 1 | 2 | 3 | 1 | 1 | 1 | 1 | 1 | 1 | 4 | 2 | 1 | 1 | 4 | 1 | 4 | 1 | 2 | 18 | 0.33 |
| 591 | 1 | 4 | 4 | 3 | 2 | 3 | 2 | 1 | 4 | 3 | 1 | 1 | 1 | 4 | 3 | 2 | 2 | 3 | 1 | 3 | 3 | 2 | 19 | 0.05 |
| 592 | 1 | 4 | 4 | 4 | 2 | 4 | 1 | 4 | 3 | 2 | 1 | 1 | 1 | 4 | 4 | 2 | 3 | 2 | 4 | 2 | 2 | 2 | 18 | 0.06 |
| 593 | 2 | 2 | 1 | 1 | 4 | 4 | 2 | 1 | 4 | 2 | 3 | 2 | 1 | 1 | 1 | 4 | 1 | 1 | 1 | 1 | 2 | 2 | 17 | 0.76 |
| 594 | 2 | 2 | 1 | 2 | 4 | 1 | 3 | 4 | 1 | 3 | 3 | 2 | 1 | 1 | 2 | 4 | 2 | 2 | 4 | 2 | 3 | 2 | 18 | 0.72 |
| 595 | 2 | 1 | 1 | 3 | 3 | 3 | 3 | 4 | 3 | 1 | 2 | 2 | 2 | 1 | 3 | 3 | 2 | 4 | 4 | 2 | 1 | 3 | 16 | 0.13 |
| 596 | 2 | 1 | 1 | 4 | 3 | 4 | 4 | 1 | 4 | 4 | 2 | 2 | 2 | 1 | 4 | 3 | 3 | 1 | 1 | 3 | 4 | 3 | 18 | 0.06 |
| 597 | 2 | 2 | 2 | 1 | 1 | 1 | 2 | 1 | 3 | 4 | 2 | 2 | 3 | 2 | 1 | 1 | 4 | 3 | 1 | 2 | 4 | 3 | 17 | 0.24 |
| 598 | 2 | 2 | 2 | 2 | 1 | 2 | 1 | 4 | 4 | 1 | 2 | 2 | 3 | 2 | 2 | 1 | 1 | 2 | 4 | 3 | 1 | 3 | 14 | 0.29 |
| 599 | 2 | 2 | 2 | 3 | 2 | 3 | 4 | 4 | 1 | 3 | 2 | 2 | 3 | 2 | 3 | 2 | 2 | 1 | 4 | 4 | 3 | 3 | 17 | 0.29 |
| 600 | 2 | 2 | 2 | 4 | 2 | 4 | 3 | 1 | 2 | 2 | 2 | 2 | 3 | 2 | 4 | 2 | 3 | 4 | 1 | 1 | 2 | 3 | 16 | 0.13 |
| 601 | 2 | 3 | 3 | 1 | 4 | 1 | 3 | 2 | 4 | 3 | 2 | 2 | 4 | 3 | 1 | 4 | 4 | 4 | 2 | 3 | 3 | 3 | 16 | 0.31 |
| 602 | 2 | 3 | 3 | 2 | 4 | 2 | 4 | 3 | 3 | 2 | 2 | 2 | 4 | 3 | 2 | 4 | 1 | 1 | 3 | 2 | 2 | 3 | 17 | 0.24 |
| 603 | 2 | 4 | 3 | 3 | 3 | 2 | 2 | 3 | 1 | 4 | 3 | 2 | 3 | 3 | 3 | 3 | 3 | 1 | 3 | 2 | 4 | 2 | 16 | 0.88 |

|     |   |   |   |   |   |   |   |   |   |   |   |   |   |   |   |   |   |   |   |   |   |   |    |      |
|-----|---|---|---|---|---|---|---|---|---|---|---|---|---|---|---|---|---|---|---|---|---|---|----|------|
| 604 | 2 | 4 | 3 | 4 | 3 | 3 | 3 | 2 | 4 | 1 | 3 | 2 | 3 | 3 | 4 | 3 | 4 | 2 | 2 | 1 | 1 | 2 | 17 | 0.41 |
| 605 | 2 | 1 | 4 | 1 | 1 | 4 | 1 | 2 | 1 | 1 | 3 | 2 | 4 | 4 | 1 | 1 | 1 | 4 | 2 | 2 | 1 | 2 | 17 | 0.88 |
| 606 | 2 | 1 | 4 | 2 | 1 | 1 | 4 | 3 | 4 | 4 | 3 | 2 | 4 | 4 | 2 | 1 | 2 | 3 | 3 | 1 | 4 | 2 | 18 | 0.61 |
| 607 | 2 | 4 | 4 | 3 | 2 | 3 | 2 | 3 | 4 | 2 | 2 | 2 | 1 | 4 | 3 | 2 | 2 | 3 | 3 | 3 | 2 | 3 | 18 | 0.06 |
| 608 | 2 | 4 | 4 | 4 | 2 | 4 | 1 | 2 | 3 | 3 | 2 | 2 | 1 | 4 | 4 | 2 | 3 | 2 | 2 | 2 | 3 | 3 | 18 | 0.11 |
| 609 | 3 | 2 | 1 | 1 | 2 | 4 | 2 | 1 | 4 | 4 | 4 | 3 | 1 | 1 | 1 | 2 | 1 | 1 | 1 | 1 | 4 | 3 | 17 | 0.53 |
| 610 | 3 | 1 | 1 | 2 | 2 | 2 | 2 | 4 | 2 | 1 | 3 | 3 | 2 | 1 | 2 | 2 | 1 | 3 | 4 | 1 | 1 | 4 | 17 | 0.18 |
| 611 | 3 | 2 | 1 | 3 | 1 | 2 | 4 | 4 | 2 | 3 | 4 | 3 | 1 | 1 | 3 | 1 | 3 | 3 | 4 | 3 | 3 | 3 | 17 | 0.82 |
| 612 | 3 | 2 | 1 | 4 | 1 | 3 | 1 | 1 | 3 | 2 | 4 | 3 | 1 | 1 | 4 | 1 | 4 | 4 | 1 | 4 | 2 | 3 | 18 | 0.78 |
| 613 | 3 | 3 | 2 | 1 | 3 | 4 | 3 | 1 | 2 | 2 | 4 | 3 | 2 | 2 | 1 | 3 | 1 | 2 | 1 | 3 | 2 | 3 | 17 | 0.76 |
| 614 | 3 | 3 | 2 | 2 | 3 | 1 | 2 | 4 | 3 | 3 | 4 | 3 | 2 | 2 | 2 | 3 | 2 | 1 | 4 | 4 | 3 | 3 | 17 | 0.76 |
| 615 | 3 | 3 | 2 | 3 | 4 | 2 | 1 | 4 | 4 | 1 | 4 | 3 | 2 | 2 | 3 | 4 | 3 | 4 | 4 | 1 | 1 | 3 | 17 | 0.59 |
| 616 | 3 | 3 | 2 | 4 | 4 | 3 | 4 | 1 | 1 | 4 | 4 | 3 | 2 | 2 | 4 | 4 | 4 | 3 | 1 | 2 | 4 | 3 | 15 | 0.67 |
| 617 | 3 | 4 | 3 | 1 | 2 | 4 | 4 | 2 | 3 | 1 | 4 | 3 | 3 | 3 | 1 | 2 | 1 | 3 | 2 | 4 | 1 | 3 | 18 | 0.67 |
| 618 | 3 | 4 | 3 | 2 | 2 | 1 | 1 | 3 | 2 | 4 | 4 | 3 | 3 | 3 | 2 | 2 | 2 | 4 | 3 | 3 | 4 | 3 | 18 | 0.83 |
| 619 | 3 | 3 | 3 | 3 | 1 | 3 | 1 | 3 | 2 | 2 | 3 | 3 | 4 | 3 | 3 | 1 | 2 | 2 | 3 | 1 | 2 | 4 | 17 | 0.41 |
| 620 | 3 | 4 | 3 | 4 | 1 | 3 | 3 | 2 | 4 | 3 | 4 | 3 | 3 | 3 | 4 | 1 | 4 | 2 | 2 | 1 | 3 | 3 | 16 | 0.44 |
| 621 | 3 | 1 | 4 | 1 | 3 | 4 | 1 | 2 | 1 | 3 | 4 | 3 | 4 | 4 | 1 | 3 | 1 | 4 | 2 | 2 | 3 | 3 | 17 | 0.82 |
| 622 | 3 | 1 | 4 | 2 | 3 | 1 | 4 | 3 | 4 | 2 | 4 | 3 | 4 | 4 | 2 | 3 | 2 | 3 | 3 | 1 | 2 | 3 | 17 | 0.65 |
| 623 | 3 | 1 | 4 | 3 | 4 | 2 | 3 | 3 | 3 | 4 | 4 | 3 | 4 | 4 | 3 | 4 | 3 | 2 | 3 | 4 | 4 | 3 | 17 | 0.76 |
| 624 | 3 | 4 | 4 | 4 | 4 | 4 | 1 | 2 | 3 | 1 | 3 | 3 | 1 | 4 | 4 | 4 | 3 | 2 | 2 | 2 | 1 | 4 | 17 | 0.06 |
| 625 | 4 | 1 | 1 | 1 | 2 | 1 | 1 | 3 | 1 | 1 | 4 | 4 | 2 | 1 | 1 | 2 | 4 | 2 | 3 | 4 | 1 | 1 | 18 | 0.94 |
| 626 | 4 | 1 | 1 | 2 | 2 | 2 | 2 | 2 | 2 | 4 | 4 | 4 | 2 | 1 | 2 | 2 | 1 | 3 | 2 | 1 | 4 | 1 | 18 | 0.94 |
| 627 | 4 | 2 | 1 | 3 | 1 | 2 | 4 | 2 | 2 | 2 | 1 | 4 | 1 | 1 | 3 | 1 | 3 | 3 | 2 | 3 | 2 | 4 | 18 | 0.06 |
| 628 | 4 | 2 | 1 | 4 | 1 | 3 | 1 | 3 | 3 | 3 | 1 | 4 | 1 | 1 | 4 | 1 | 4 | 4 | 3 | 4 | 3 | 4 | 18 | 0.39 |
| 629 | 4 | 3 | 2 | 1 | 3 | 4 | 3 | 3 | 2 | 3 | 1 | 4 | 2 | 2 | 1 | 3 | 1 | 2 | 3 | 3 | 3 | 4 | 17 | 0.24 |
| 630 | 4 | 3 | 2 | 2 | 3 | 1 | 2 | 2 | 3 | 2 | 1 | 4 | 2 | 2 | 2 | 3 | 2 | 1 | 2 | 4 | 2 | 4 | 18 | 0.17 |
| 631 | 4 | 3 | 2 | 3 | 4 | 2 | 1 | 2 | 4 | 4 | 1 | 4 | 2 | 2 | 3 | 4 | 3 | 4 | 2 | 1 | 4 | 4 | 17 | 0.18 |
| 632 | 4 | 2 | 2 | 4 | 4 | 4 | 3 | 3 | 2 | 1 | 4 | 4 | 3 | 2 | 4 | 4 | 3 | 4 | 3 | 1 | 1 | 1 | 17 | 0.82 |
| 633 | 4 | 3 | 3 | 1 | 2 | 1 | 3 | 4 | 4 | 4 | 4 | 4 | 4 | 3 | 1 | 2 | 4 | 4 | 4 | 3 | 4 | 1 | 18 | 0.78 |
| 634 | 4 | 4 | 3 | 2 | 2 | 1 | 1 | 1 | 2 | 1 | 1 | 4 | 3 | 3 | 2 | 2 | 2 | 4 | 1 | 3 | 1 | 4 | 19 | 0.11 |
| 635 | 4 | 4 | 3 | 3 | 1 | 2 | 2 | 1 | 1 | 3 | 1 | 4 | 3 | 3 | 3 | 1 | 3 | 1 | 1 | 2 | 3 | 4 | 16 | 0.19 |

|     |   |   |   |   |   |   |   |   |   |   |   |   |   |   |   |   |   |   |   |   |   |   |    |      |
|-----|---|---|---|---|---|---|---|---|---|---|---|---|---|---|---|---|---|---|---|---|---|---|----|------|
| 636 | 4 | 3 | 3 | 4 | 1 | 4 | 2 | 4 | 1 | 2 | 4 | 4 | 4 | 3 | 4 | 1 | 3 | 3 | 4 | 4 | 2 | 1 | 17 | 0.88 |
| 637 | 4 | 1 | 4 | 1 | 3 | 4 | 1 | 4 | 1 | 2 | 1 | 4 | 4 | 4 | 1 | 3 | 1 | 4 | 4 | 2 | 2 | 4 | 17 | 0.24 |
| 638 | 4 | 4 | 4 | 2 | 3 | 2 | 3 | 1 | 1 | 3 | 4 | 4 | 1 | 4 | 2 | 3 | 1 | 4 | 1 | 4 | 3 | 1 | 17 | 0.82 |
| 639 | 4 | 4 | 4 | 3 | 4 | 3 | 2 | 1 | 4 | 1 | 4 | 4 | 1 | 4 | 3 | 4 | 2 | 3 | 1 | 3 | 1 | 1 | 17 | 0.71 |
| 640 | 4 | 4 | 4 | 4 | 4 | 4 | 1 | 4 | 3 | 4 | 4 | 4 | 1 | 4 | 4 | 4 | 3 | 2 | 4 | 2 | 4 | 1 | 17 | 0.53 |
| 641 | 1 | 1 | 2 | 4 | 1 | 2 | 4 | 3 | 3 | 4 | 2 | 1 | 1 | 1 | 1 | 1 | 1 | 4 | 3 | 3 | 1 | 1 | 18 | 0.56 |
| 642 | 1 | 1 | 1 | 2 | 2 | 2 | 4 | 2 | 2 | 2 | 1 | 1 | 1 | 2 | 1 | 2 | 3 | 4 | 2 | 2 | 1 | 2 | 18 | 0.11 |
| 643 | 1 | 1 | 2 | 2 | 3 | 4 | 3 | 2 | 4 | 2 | 2 | 1 | 1 | 1 | 3 | 3 | 3 | 3 | 2 | 4 | 3 | 1 | 16 | 0.81 |
| 644 | 1 | 1 | 1 | 4 | 4 | 4 | 3 | 3 | 1 | 4 | 1 | 1 | 1 | 2 | 3 | 4 | 1 | 3 | 3 | 1 | 3 | 2 | 17 | 0.06 |
| 645 | 1 | 2 | 3 | 4 | 1 | 3 | 1 | 3 | 1 | 2 | 2 | 1 | 2 | 2 | 1 | 1 | 2 | 1 | 3 | 1 | 3 | 1 | 18 | 0.67 |
| 646 | 1 | 2 | 2 | 2 | 2 | 1 | 1 | 2 | 4 | 4 | 1 | 1 | 2 | 3 | 1 | 2 | 2 | 1 | 2 | 4 | 3 | 2 | 14 | 0.43 |
| 647 | 1 | 2 | 3 | 2 | 3 | 1 | 2 | 2 | 2 | 4 | 2 | 1 | 2 | 2 | 3 | 3 | 4 | 2 | 2 | 2 | 1 | 1 | 18 | 0.56 |
| 648 | 1 | 2 | 3 | 3 | 4 | 4 | 2 | 3 | 3 | 1 | 2 | 1 | 2 | 2 | 4 | 4 | 3 | 2 | 3 | 3 | 2 | 1 | 17 | 0.71 |
| 649 | 1 | 3 | 3 | 1 | 1 | 3 | 4 | 4 | 2 | 4 | 1 | 1 | 3 | 4 | 4 | 1 | 4 | 4 | 4 | 2 | 3 | 2 | 17 | 0.47 |
| 650 | 1 | 3 | 4 | 1 | 2 | 1 | 4 | 1 | 3 | 2 | 2 | 1 | 3 | 3 | 2 | 2 | 4 | 4 | 1 | 3 | 3 | 1 | 16 | 0.94 |
| 651 | 1 | 3 | 3 | 3 | 3 | 1 | 3 | 1 | 1 | 2 | 1 | 1 | 3 | 4 | 2 | 3 | 2 | 3 | 1 | 1 | 1 | 2 | 18 | 0.11 |
| 652 | 1 | 3 | 3 | 4 | 4 | 2 | 3 | 4 | 4 | 1 | 1 | 1 | 3 | 4 | 3 | 4 | 3 | 3 | 4 | 4 | 4 | 2 | 18 | 0.72 |
| 653 | 1 | 4 | 4 | 1 | 1 | 4 | 1 | 4 | 4 | 2 | 1 | 1 | 4 | 1 | 4 | 1 | 1 | 1 | 4 | 4 | 1 | 2 | 18 | 0.11 |
| 654 | 1 | 4 | 1 | 1 | 2 | 4 | 1 | 1 | 1 | 4 | 2 | 1 | 4 | 4 | 2 | 2 | 3 | 1 | 1 | 1 | 1 | 1 | 18 | 0.89 |
| 655 |   |   |   |   |   |   |   |   |   |   |   |   |   |   |   |   |   |   |   |   |   |   | 18 | 0.17 |
| 656 | 1 | 4 | 1 | 3 | 4 | 2 | 2 | 4 | 2 | 2 | 2 | 1 | 4 | 4 | 4 | 4 | 1 | 2 | 4 | 2 | 3 | 1 | 18 | 0.89 |
| 657 | 2 | 1 | 1 | 1 | 1 | 1 | 4 | 1 | 2 | 1 | 2 | 2 | 1 | 2 | 4 | 1 | 2 | 4 | 1 | 2 | 4 | 3 | 16 | 0.50 |
| 658 | 2 | 1 | 1 | 2 | 2 | 2 | 4 | 4 | 3 | 2 | 2 | 2 | 1 | 2 | 1 | 2 | 3 | 4 | 4 | 3 | 1 | 3 | 17 | 0.06 |
| 659 | 2 | 1 | 2 | 2 | 3 | 4 | 3 | 4 | 1 | 2 | 3 | 2 | 1 | 1 | 3 | 3 | 3 | 3 | 4 | 1 | 3 | 2 | 16 | 1.00 |
| 660 | 2 | 1 | 1 | 4 | 4 | 4 | 3 | 1 | 4 | 4 | 2 | 2 | 1 | 2 | 3 | 4 | 1 | 3 | 1 | 4 | 3 | 3 | 18 | 0.11 |
| 661 | 2 | 2 | 2 | 1 | 1 | 2 | 1 | 1 | 4 | 3 | 2 | 2 | 2 | 3 | 4 | 1 | 3 | 1 | 1 | 4 | 2 | 3 | 15 | 0.60 |
| 662 | 2 | 2 | 2 | 2 | 2 | 1 | 1 | 4 | 1 | 4 | 2 | 2 | 2 | 3 | 1 | 2 | 2 | 1 | 4 | 1 | 3 | 3 | 17 | 0.12 |
| 663 | 2 | 2 | 2 | 3 | 3 | 4 | 2 | 4 | 3 | 1 | 2 | 2 | 2 | 3 | 2 | 3 | 1 | 2 | 4 | 3 | 4 | 3 | 17 | 0.12 |
| 664 | 2 | 2 | 3 | 3 | 4 | 4 | 2 | 1 | 2 | 1 | 3 | 2 | 2 | 2 | 4 | 4 | 3 | 2 | 1 | 2 | 2 | 2 | 18 | 0.83 |
| 665 | 2 | 3 | 4 | 4 | 1 | 4 | 4 | 2 | 3 | 3 | 3 | 2 | 3 | 3 | 1 | 1 | 3 | 4 | 2 | 3 | 4 | 2 | 18 | 0.50 |
| 666 | 2 | 3 | 4 | 1 | 2 | 1 | 4 | 3 | 2 | 2 | 3 | 2 | 3 | 3 | 2 | 2 | 4 | 4 | 3 | 2 | 3 | 2 | 17 | 0.82 |
| 667 | 2 | 3 | 4 | 2 | 3 | 2 | 3 | 3 | 4 | 1 | 3 | 2 | 3 | 3 | 3 | 3 | 1 | 3 | 3 | 4 | 2 | 2 | 17 | 0.94 |

|     |   |   |   |   |   |   |   |   |   |   |   |   |   |   |   |   |   |   |   |   |   |   |    |      |
|-----|---|---|---|---|---|---|---|---|---|---|---|---|---|---|---|---|---|---|---|---|---|---|----|------|
| 668 | 2 | 3 | 3 | 4 | 4 | 2 | 3 | 2 | 1 | 1 | 2 | 2 | 3 | 4 | 3 | 4 | 3 | 3 | 2 | 1 | 4 | 3 | 18 | 0.56 |
| 669 | 2 | 4 | 4 | 1 | 1 | 4 | 1 | 2 | 1 | 2 | 2 | 2 | 4 | 1 | 4 | 1 | 1 | 1 | 2 | 1 | 1 | 3 | 18 | 0.17 |
| 670 | 2 | 4 | 1 | 1 | 2 | 4 | 1 | 3 | 4 | 4 | 3 | 2 | 4 | 4 | 2 | 2 | 3 | 1 | 3 | 4 | 1 | 2 | 17 | 0.76 |
| 671 | 2 | 4 | 4 | 3 | 3 | 2 | 2 | 3 | 2 | 4 | 2 | 2 | 4 | 1 | 2 | 3 | 3 | 2 | 3 | 2 | 3 | 3 | 18 | 0.06 |
| 672 | 2 | 4 | 4 | 4 | 4 | 1 | 2 | 2 | 3 | 3 | 2 | 2 | 4 | 1 | 3 | 4 | 2 | 2 | 2 | 3 | 2 | 3 | 15 | 0.20 |
| 673 | 3 | 1 | 1 | 1 | 1 | 1 | 2 | 1 | 4 | 1 | 3 | 3 | 1 | 2 | 4 | 1 | 2 | 2 | 1 | 4 | 4 | 4 | 17 | 0.59 |
| 674 | 3 | 1 | 2 | 1 | 2 | 3 | 2 | 4 | 1 | 1 | 4 | 3 | 1 | 1 | 2 | 2 | 2 | 2 | 4 | 1 | 2 | 3 | 18 | 0.83 |
| 675 | 3 | 1 | 2 | 2 | 3 | 4 | 1 | 4 | 3 | 2 | 4 | 3 | 1 | 1 | 3 | 3 | 3 | 1 | 4 | 3 | 3 | 3 | 17 | 0.94 |
| 676 | 3 | 1 | 2 | 3 | 4 | 1 | 1 | 1 | 2 | 3 | 4 | 3 | 1 | 1 | 4 | 4 | 4 | 1 | 1 | 2 | 4 | 3 | 17 | 0.94 |
| 677 | 3 | 2 | 3 | 4 | 1 | 3 | 3 | 1 | 2 | 2 | 4 | 3 | 2 | 2 | 1 | 1 | 2 | 3 | 1 | 2 | 3 | 3 | 18 | 0.61 |
| 678 | 3 | 2 | 2 | 2 | 2 | 1 | 3 | 4 | 3 | 4 | 3 | 3 | 2 | 3 | 1 | 2 | 2 | 3 | 4 | 3 | 3 | 4 | 17 | 0.35 |
| 679 | 3 | 2 | 2 | 3 | 3 | 4 | 4 | 4 | 1 | 1 | 3 | 3 | 2 | 3 | 2 | 3 | 1 | 4 | 4 | 1 | 4 | 4 | 17 | 0.29 |
| 680 | 3 | 2 | 2 | 4 | 4 | 3 | 4 | 1 | 4 | 2 | 3 | 3 | 2 | 3 | 3 | 4 | 4 | 4 | 1 | 4 | 1 | 4 | 16 | 0.31 |
| 681 | 3 | 3 | 4 | 4 | 1 | 4 | 2 | 2 | 1 | 3 | 4 | 3 | 3 | 3 | 1 | 1 | 3 | 2 | 2 | 1 | 4 | 3 | 17 | 0.53 |
| 682 | 3 | 3 | 3 | 2 | 2 | 4 | 2 | 3 | 4 | 3 | 3 | 3 | 3 | 4 | 1 | 2 | 1 | 2 | 3 | 4 | 2 | 4 | 17 | 0.35 |
| 683 | 3 | 3 | 3 | 3 | 3 | 1 | 1 | 3 | 2 | 2 | 3 | 3 | 3 | 4 | 2 | 3 | 2 | 1 | 3 | 2 | 1 | 4 | 18 | 0.33 |
| 684 | 3 | 3 | 3 | 4 | 4 | 2 | 1 | 2 | 3 | 1 | 3 | 3 | 3 | 4 | 3 | 4 | 3 | 1 | 2 | 3 | 4 | 4 | 17 | 0.47 |
| 685 | 3 | 4 | 1 | 4 | 1 | 1 | 3 | 2 | 3 | 1 | 4 | 3 | 4 | 4 | 1 | 1 | 4 | 3 | 2 | 3 | 2 | 3 | 18 | 0.78 |
| 686 | 3 | 4 | 1 | 1 | 2 | 4 | 3 | 3 | 2 | 4 | 4 | 3 | 4 | 4 | 2 | 2 | 3 | 3 | 3 | 2 | 1 | 3 | 16 | 0.81 |
| 687 | 3 | 4 | 4 | 3 | 3 | 2 | 4 | 3 | 4 | 4 | 3 | 3 | 4 | 1 | 2 | 3 | 3 | 4 | 3 | 4 | 3 | 4 | 18 | 0.06 |
| 688 | 3 | 4 | 4 | 4 | 4 | 1 | 4 | 2 | 1 | 3 | 3 | 3 | 4 | 1 | 3 | 4 | 2 | 4 | 2 | 1 | 2 | 4 | 18 | 0.06 |
| 689 | 4 | 1 | 1 | 1 | 1 | 1 | 2 | 3 | 1 | 1 | 4 | 4 | 1 | 2 | 4 | 1 | 2 | 2 | 3 | 1 | 4 | 1 | 18 | 1.00 |
| 690 | 4 | 1 | 1 | 2 | 2 | 2 | 2 | 2 | 4 | 2 | 4 | 4 | 1 | 2 | 1 | 2 | 3 | 2 | 2 | 4 | 1 | 1 | 18 | 0.83 |
| 691 | 4 | 1 | 1 | 3 | 3 | 3 | 1 | 2 | 2 | 3 | 4 | 4 | 1 | 2 | 2 | 3 | 4 | 1 | 2 | 2 | 2 | 1 | 18 | 0.83 |
| 692 | 4 | 1 | 1 | 4 | 4 | 4 | 1 | 3 | 3 | 4 | 4 | 4 | 1 | 2 | 3 | 4 | 1 | 1 | 3 | 3 | 3 | 1 | 19 | 0.89 |
| 693 | 4 | 2 | 2 | 1 | 1 | 2 | 3 | 3 | 3 | 3 | 4 | 4 | 2 | 3 | 4 | 1 | 3 | 3 | 3 | 3 | 2 | 1 | 16 | 0.94 |
| 694 | 4 | 2 | 2 | 2 | 2 | 1 | 3 | 2 | 2 | 4 | 4 | 4 | 2 | 3 | 1 | 2 | 2 | 3 | 2 | 2 | 3 | 1 | 16 | 0.88 |
| 695 | 4 | 2 | 2 | 3 | 3 | 4 | 4 | 2 | 4 | 1 | 4 | 4 | 2 | 3 | 2 | 3 | 1 | 4 | 2 | 4 | 4 | 1 | 18 | 0.94 |
| 696 | 4 | 2 | 2 | 4 | 4 | 3 | 4 | 3 | 1 | 2 | 4 | 4 | 2 | 3 | 3 | 4 | 4 | 4 | 3 | 1 | 1 | 1 | 18 | 0.83 |
| 697 | 4 | 3 | 4 | 4 | 1 | 4 | 2 | 4 | 4 | 3 | 1 | 4 | 3 | 3 | 1 | 1 | 3 | 2 | 4 | 4 | 4 | 4 | 17 | 0.06 |
| 698 | 4 | 3 | 3 | 2 | 2 | 4 | 2 | 1 | 1 | 3 | 4 | 4 | 3 | 4 | 1 | 2 | 1 | 2 | 1 | 1 | 2 | 1 | 18 | 0.89 |
| 699 | 4 | 3 | 3 | 3 | 3 | 1 | 1 | 1 | 3 | 2 | 4 | 4 | 3 | 4 | 2 | 3 | 2 | 1 | 1 | 3 | 1 | 1 | 18 | 0.83 |

|     |   |   |   |   |   |   |   |   |   |   |   |   |   |   |   |   |   |   |   |   |   |   |    |      |
|-----|---|---|---|---|---|---|---|---|---|---|---|---|---|---|---|---|---|---|---|---|---|---|----|------|
| 700 | 4 | 3 | 4 | 3 | 4 | 3 | 1 | 4 | 2 | 4 | 1 | 4 | 3 | 3 | 4 | 4 | 2 | 1 | 4 | 2 | 1 | 4 | 17 | 0.12 |
| 701 | 4 | 4 | 1 | 4 | 1 | 1 | 3 | 4 | 2 | 1 | 1 | 4 | 4 | 4 | 1 | 1 | 4 | 3 | 4 | 2 | 2 | 4 | 16 | 0.19 |
| 702 | 4 | 4 | 4 | 2 | 2 | 3 | 3 | 1 | 3 | 1 | 4 | 4 | 4 | 1 | 1 | 2 | 4 | 3 | 1 | 3 | 4 | 1 | 17 | 0.59 |
| 703 | 4 | 4 | 1 | 2 | 3 | 3 | 4 | 1 | 1 | 3 | 1 | 4 | 4 | 4 | 3 | 3 | 2 | 4 | 1 | 1 | 4 | 4 | 16 | 0.25 |
| 704 | 4 | 4 | 4 | 4 | 4 | 1 | 4 | 4 | 4 | 3 | 4 | 4 | 4 | 1 | 3 | 4 | 2 | 4 | 4 | 4 | 2 | 1 | 18 | 0.56 |
| 705 | 1 | 1 | 2 | 1 | 4 | 4 | 3 | 3 | 2 | 4 | 2 | 1 | 1 | 1 | 1 | 1 | 4 | 3 | 3 | 1 | 1 | 1 | 19 | 0.47 |
| 706 | 1 | 1 | 2 | 2 | 1 | 4 | 2 | 2 | 3 | 1 | 2 | 1 | 1 | 1 | 2 | 2 | 4 | 2 | 2 | 2 | 2 | 1 | 17 | 0.71 |
| 707 | 1 | 1 | 1 | 3 | 3 | 3 | 2 | 4 | 3 | 3 | 1 | 1 | 1 | 2 | 3 | 2 | 3 | 2 | 4 | 4 | 2 | 2 | 18 | 0.22 |
| 708 | 1 | 1 | 1 | 4 | 4 | 3 | 3 | 1 | 4 | 4 | 1 | 1 | 1 | 2 | 4 | 3 | 3 | 3 | 1 | 1 | 3 | 2 | 16 | 0.13 |
| 709 | 1 | 2 | 3 | 1 | 4 | 1 | 3 | 1 | 3 | 2 | 2 | 1 | 2 | 2 | 1 | 1 | 1 | 3 | 1 | 2 | 3 | 1 | 17 | 0.47 |
| 710 | 1 | 2 | 3 | 2 | 1 | 1 | 2 | 4 | 2 | 3 | 2 | 1 | 2 | 2 | 2 | 2 | 1 | 2 | 4 | 1 | 4 | 1 | 17 | 0.88 |
| 711 | 1 | 2 | 3 | 3 | 2 | 2 | 2 | 2 | 1 | 4 | 2 | 1 | 2 | 2 | 3 | 3 | 2 | 2 | 2 | 4 | 1 | 1 | 17 | 0.94 |
| 712 | 1 | 2 | 3 | 4 | 3 | 2 | 3 | 3 | 4 | 1 | 2 | 1 | 2 | 2 | 4 | 4 | 2 | 3 | 3 | 3 | 2 | 1 | 16 | 0.50 |
| 713 | 1 | 3 | 4 | 1 | 4 | 4 | 4 | 2 | 4 | 3 | 2 | 1 | 3 | 3 | 1 | 1 | 4 | 4 | 2 | 3 | 4 | 1 | 17 | 0.53 |
| 714 | 1 | 3 | 3 | 2 | 2 | 4 | 1 | 3 | 4 | 3 | 1 | 1 | 3 | 4 | 2 | 1 | 4 | 1 | 3 | 1 | 2 | 2 | 17 | 0.00 |
| 715 | 1 | 3 | 4 | 3 | 2 | 3 | 1 | 1 | 2 | 1 | 2 | 1 | 3 | 3 | 3 | 3 | 3 | 1 | 1 | 1 | 2 | 1 | 18 | 0.78 |
| 716 | 1 | 3 | 4 | 4 | 3 | 3 | 4 | 4 | 3 | 4 | 2 | 1 | 3 | 3 | 4 | 4 | 3 | 4 | 4 | 2 | 1 | 1 | 16 | 0.44 |
| 717 | 1 | 4 | 4 | 1 | 1 | 1 | 4 | 4 | 4 | 2 | 1 | 1 | 4 | 1 | 1 | 4 | 1 | 4 | 4 | 1 | 1 | 2 | 18 | 0.28 |
| 718 | 1 | 4 | 4 | 2 | 2 | 1 | 1 | 1 | 3 | 1 | 1 | 1 | 4 | 1 | 2 | 1 | 1 | 1 | 1 | 4 | 4 | 2 | 15 | 0.33 |
| 719 | 1 | 4 | 4 | 3 | 3 | 2 | 1 | 3 | 2 | 4 | 1 | 1 | 4 | 1 | 3 | 2 | 2 | 1 | 3 | 3 | 3 | 2 | 17 | 0.06 |
| 720 | 1 | 4 | 4 | 4 | 4 | 2 | 4 | 2 | 1 | 3 | 1 | 1 | 4 | 1 | 4 | 3 | 2 | 4 | 2 | 2 | 2 | 2 | 16 | 0.13 |
| 721 | 2 | 1 | 1 | 1 | 1 | 4 | 1 | 2 | 1 | 1 | 2 | 2 | 1 | 2 | 1 | 4 | 4 | 1 | 2 | 2 | 4 | 3 | 19 | 0.53 |
| 722 | 2 | 1 | 2 | 2 | 1 | 4 | 4 | 3 | 3 | 1 | 3 | 2 | 1 | 1 | 2 | 2 | 4 | 4 | 3 | 2 | 2 | 2 | 18 | 0.83 |
| 723 | 2 | 1 | 1 | 3 | 3 | 3 | 4 | 1 | 3 | 3 | 2 | 2 | 1 | 2 | 3 | 2 | 3 | 4 | 1 | 4 | 2 | 3 | 17 | 0.12 |
| 724 | 2 | 1 | 1 | 4 | 4 | 3 | 1 | 4 | 4 | 4 | 2 | 2 | 1 | 2 | 4 | 3 | 3 | 1 | 4 | 1 | 3 | 3 | 16 | 0.06 |
| 725 | 2 | 2 | 2 | 1 | 1 | 1 | 1 | 4 | 2 | 3 | 2 | 2 | 2 | 3 | 1 | 4 | 1 | 1 | 4 | 3 | 2 | 3 | 17 | 0.41 |
| 726 | 2 | 2 | 2 | 2 | 2 | 1 | 4 | 1 | 1 | 4 | 2 | 2 | 2 | 3 | 2 | 1 | 1 | 4 | 1 | 2 | 3 | 3 | 17 | 0.29 |
| 727 | 2 | 2 | 3 | 3 | 2 | 2 | 4 | 3 | 1 | 4 | 3 | 2 | 2 | 2 | 3 | 3 | 2 | 4 | 3 | 4 | 1 | 2 | 18 | 0.94 |
| 728 | 2 | 2 | 2 | 4 | 4 | 2 | 1 | 2 | 3 | 2 | 2 | 2 | 2 | 3 | 4 | 3 | 2 | 1 | 2 | 4 | 1 | 3 | 16 | 0.19 |
| 729 | 2 | 3 | 3 | 1 | 1 | 4 | 2 | 3 | 3 | 4 | 2 | 2 | 3 | 4 | 1 | 4 | 4 | 2 | 3 | 4 | 3 | 3 | 18 | 0.44 |
| 730 | 2 | 3 | 3 | 2 | 2 | 4 | 3 | 2 | 4 | 3 | 2 | 2 | 3 | 4 | 2 | 1 | 4 | 3 | 2 | 1 | 2 | 3 | 18 | 0.11 |
| 731 | 2 | 3 | 4 | 3 | 2 | 3 | 3 | 4 | 2 | 1 | 3 | 2 | 3 | 3 | 3 | 3 | 3 | 3 | 4 | 1 | 2 | 2 | 17 | 0.76 |



|     |   |   |   |   |   |   |   |   |   |   |   |   |   |   |   |   |   |   |   |   |   |   |    |      |
|-----|---|---|---|---|---|---|---|---|---|---|---|---|---|---|---|---|---|---|---|---|---|---|----|------|
| 732 | 2 | 3 | 3 | 4 | 4 | 3 | 2 | 1 | 2 | 1 | 2 | 2 | 3 | 4 | 4 | 3 | 3 | 2 | 1 | 3 | 4 | 3 | 18 | 0.22 |
| 733 | 2 | 4 | 1 | 1 | 4 | 1 | 2 | 1 | 1 | 1 | 3 | 2 | 4 | 4 | 1 | 1 | 1 | 2 | 1 | 4 | 2 | 2 | 18 | 0.94 |
| 734 | 2 | 4 | 4 | 2 | 2 | 1 | 3 | 4 | 3 | 1 | 2 | 2 | 4 | 1 | 2 | 1 | 1 | 3 | 4 | 4 | 4 | 3 | 17 | 0.24 |
| 735 | 2 | 4 | 1 | 3 | 2 | 2 | 3 | 2 | 3 | 3 | 3 | 2 | 4 | 4 | 3 | 3 | 2 | 3 | 2 | 2 | 4 | 2 | 17 | 0.94 |
| 736 | 2 | 4 | 4 | 4 | 4 | 2 | 2 | 3 | 1 | 3 | 2 | 2 | 4 | 1 | 4 | 3 | 2 | 2 | 3 | 2 | 2 | 3 | 17 | 0.18 |
| 737 | 3 | 1 | 2 | 1 | 4 | 2 | 1 | 4 | 2 | 4 | 4 | 3 | 1 | 1 | 1 | 1 | 2 | 1 | 4 | 1 | 1 | 3 | 17 | 0.53 |
| 738 | 3 | 1 | 1 | 2 | 2 | 2 | 4 | 1 | 2 | 2 | 3 | 3 | 1 | 2 | 2 | 1 | 2 | 4 | 1 | 3 | 1 | 4 | 17 | 0.35 |
| 739 | 3 | 1 | 1 | 3 | 3 | 1 | 4 | 3 | 3 | 3 | 3 | 3 | 1 | 2 | 3 | 2 | 1 | 4 | 3 | 4 | 2 | 4 | 18 | 0.17 |
| 740 | 3 | 1 | 2 | 4 | 3 | 1 | 1 | 2 | 1 | 3 | 4 | 3 | 1 | 1 | 4 | 4 | 1 | 1 | 2 | 4 | 4 | 3 | 17 | 0.88 |
| 741 | 3 | 2 | 3 | 1 | 4 | 3 | 1 | 2 | 3 | 2 | 4 | 3 | 2 | 2 | 1 | 1 | 3 | 1 | 2 | 2 | 3 | 3 | 16 | 0.63 |
| 742 | 3 | 2 | 3 | 2 | 1 | 3 | 4 | 3 | 2 | 3 | 4 | 3 | 2 | 2 | 2 | 2 | 3 | 4 | 3 | 1 | 4 | 3 | 16 | 0.88 |
| 743 | 3 | 2 | 2 | 3 | 3 | 4 | 4 | 1 | 4 | 1 | 3 | 3 | 2 | 3 | 3 | 2 | 4 | 4 | 1 | 1 | 4 | 4 | 16 | 0.19 |
| 744 | 3 | 2 | 2 | 4 | 4 | 4 | 1 | 4 | 3 | 2 | 3 | 3 | 2 | 3 | 4 | 3 | 4 | 1 | 4 | 4 | 1 | 4 | 18 | 0.44 |
| 745 | 3 | 3 | 3 | 1 | 1 | 2 | 2 | 1 | 3 | 4 | 3 | 3 | 3 | 4 | 1 | 4 | 2 | 2 | 1 | 4 | 3 | 4 | 18 | 0.61 |
| 746 | 3 | 3 | 3 | 2 | 2 | 2 | 3 | 4 | 4 | 3 | 3 | 3 | 3 | 4 | 2 | 1 | 2 | 3 | 4 | 1 | 2 | 4 | 18 | 0.11 |
| 747 | 3 | 3 | 4 | 3 | 2 | 1 | 3 | 2 | 2 | 1 | 4 | 3 | 3 | 3 | 3 | 3 | 1 | 3 | 2 | 1 | 2 | 3 | 18 | 0.72 |
| 748 | 3 | 3 | 3 | 4 | 4 | 1 | 2 | 3 | 2 | 1 | 3 | 3 | 3 | 4 | 4 | 3 | 1 | 2 | 3 | 3 | 4 | 4 | 16 | 0.25 |
| 749 | 3 | 4 | 4 | 1 | 1 | 3 | 2 | 3 | 4 | 2 | 3 | 3 | 4 | 1 | 1 | 4 | 3 | 2 | 3 | 1 | 1 | 4 | 17 | 0.18 |
| 750 | 3 | 4 | 4 | 2 | 2 | 3 | 3 | 2 | 3 | 1 | 3 | 3 | 4 | 1 | 2 | 1 | 3 | 3 | 2 | 4 | 4 | 4 | 17 | 0.18 |
| 751 | 3 | 4 | 1 | 3 | 2 | 4 | 3 | 4 | 3 | 3 | 4 | 3 | 4 | 4 | 3 | 3 | 4 | 3 | 4 | 2 | 4 | 3 | 16 | 1.00 |
| 752 | 3 | 4 | 1 | 4 | 3 | 4 | 2 | 1 | 2 | 2 | 4 | 3 | 4 | 4 | 4 | 4 | 4 | 2 | 1 | 1 | 3 | 3 | 19 | 1.00 |
| 753 | 4 | 1 | 2 | 1 | 4 | 2 | 3 | 1 | 2 | 4 | 1 | 4 | 1 | 1 | 1 | 1 | 2 | 3 | 1 | 1 | 1 | 4 | 18 | 0.06 |
| 754 | 4 | 1 | 1 | 2 | 2 | 2 | 2 | 4 | 2 | 2 | 4 | 4 | 1 | 2 | 2 | 1 | 2 | 2 | 4 | 3 | 1 | 1 | 18 | 1.00 |
| 755 | 4 | 1 | 1 | 3 | 3 | 1 | 2 | 2 | 3 | 3 | 4 | 4 | 1 | 2 | 3 | 2 | 1 | 2 | 2 | 4 | 2 | 1 | 17 | 0.82 |
| 756 | 4 | 1 | 2 | 4 | 3 | 1 | 3 | 3 | 1 | 3 | 1 | 4 | 1 | 1 | 4 | 4 | 1 | 3 | 3 | 4 | 4 | 4 | 17 | 0.47 |
| 757 | 4 | 2 | 2 | 1 | 1 | 3 | 3 | 3 | 2 | 3 | 4 | 4 | 2 | 3 | 1 | 4 | 3 | 3 | 3 | 3 | 2 | 1 | 18 | 0.83 |
| 758 | 4 | 2 | 3 | 2 | 1 | 3 | 2 | 2 | 2 | 3 | 1 | 4 | 2 | 2 | 2 | 2 | 3 | 2 | 2 | 1 | 4 | 4 | 17 | 0.12 |
| 759 | 4 | 2 | 2 | 3 | 3 | 4 | 2 | 4 | 4 | 1 | 4 | 4 | 2 | 3 | 3 | 2 | 4 | 2 | 4 | 1 | 4 | 1 | 17 | 0.76 |
| 760 | 4 | 2 | 2 | 4 | 4 | 4 | 3 | 1 | 3 | 2 | 4 | 4 | 2 | 3 | 4 | 3 | 4 | 3 | 1 | 4 | 1 | 1 | 17 | 0.76 |
| 761 | 4 | 3 | 4 | 1 | 4 | 2 | 4 | 4 | 4 | 3 | 1 | 4 | 3 | 3 | 1 | 1 | 2 | 4 | 4 | 3 | 4 | 4 | 17 | 0.12 |
| 762 | 4 | 3 | 3 | 2 | 2 | 2 | 1 | 1 | 4 | 3 | 4 | 4 | 3 | 4 | 2 | 1 | 2 | 1 | 1 | 1 | 2 | 1 | 17 | 0.65 |
| 763 | 4 | 3 | 3 | 3 | 3 | 1 | 1 | 3 | 1 | 2 | 4 | 4 | 3 | 4 | 3 | 2 | 1 | 1 | 3 | 2 | 1 | 1 | 18 | 0.83 |

|     |   |   |   |   |   |   |   |   |   |   |   |   |   |   |   |   |   |   |   |   |   |   |    |      |
|-----|---|---|---|---|---|---|---|---|---|---|---|---|---|---|---|---|---|---|---|---|---|---|----|------|
| 764 | 4 | 3 | 4 | 4 | 3 | 1 | 4 | 2 | 3 | 4 | 1 | 4 | 3 | 3 | 4 | 4 | 1 | 4 | 2 | 2 | 1 | 4 | 16 | 0.19 |
| 765 | 4 | 4 | 4 | 1 | 1 | 3 | 4 | 2 | 4 | 2 | 4 | 4 | 4 | 1 | 1 | 4 | 3 | 4 | 2 | 1 | 1 | 1 | 18 | 0.78 |
| 766 | 4 | 4 | 1 | 2 | 1 | 3 | 1 | 3 | 4 | 4 | 1 | 4 | 4 | 4 | 2 | 2 | 3 | 1 | 3 | 3 | 1 | 4 | 17 | 0.24 |
| 767 | 4 | 4 | 4 | 3 | 3 | 4 | 1 | 1 | 2 | 4 | 4 | 4 | 4 | 1 | 3 | 2 | 4 | 1 | 1 | 3 | 3 | 1 | 16 | 0.56 |
| 768 | 4 | 4 | 1 | 4 | 3 | 4 | 4 | 4 | 2 | 2 | 1 | 4 | 4 | 4 | 4 | 4 | 4 | 4 | 4 | 1 | 3 | 4 | 18 | 0.33 |
| 769 | 1 | 1 | 1 | 1 | 4 | 1 | 1 | 1 | 3 | 3 | 1 | 1 | 1 | 2 | 1 | 4 | 4 | 2 | 4 | 3 | 3 | 2 | 17 | 0.47 |
| 770 | 1 | 1 | 2 | 2 | 4 | 1 | 3 | 1 | 2 | 2 | 2 | 1 | 1 | 1 | 2 | 4 | 2 | 2 | 2 | 2 | 2 | 1 | 18 | 0.83 |
| 771 | 1 | 1 | 1 | 3 | 3 | 3 | 3 | 3 | 2 | 4 | 1 | 1 | 1 | 2 | 3 | 3 | 2 | 4 | 2 | 2 | 4 | 2 | 17 | 0.29 |
| 772 | 1 | 1 | 2 | 4 | 3 | 3 | 1 | 3 | 3 | 1 | 2 | 1 | 1 | 1 | 4 | 3 | 4 | 4 | 4 | 3 | 1 | 1 | 17 | 0.88 |
| 773 | 1 | 2 | 3 | 1 | 1 | 4 | 3 | 2 | 3 | 1 | 2 | 1 | 2 | 2 | 1 | 1 | 1 | 2 | 3 | 3 | 1 | 1 | 17 | 0.65 |
| 774 | 1 | 2 | 2 | 2 | 1 | 2 | 1 | 4 | 2 | 4 | 1 | 1 | 2 | 3 | 2 | 1 | 1 | 2 | 3 | 2 | 4 | 2 | 18 | 0.17 |
| 775 | 1 | 2 | 2 | 3 | 2 | 3 | 4 | 1 | 2 | 2 | 1 | 1 | 2 | 3 | 3 | 2 | 2 | 1 | 4 | 2 | 2 | 2 | 18 | 0.39 |
| 776 | 1 | 2 | 2 | 4 | 2 | 4 | 3 | 2 | 3 | 3 | 1 | 1 | 2 | 3 | 4 | 2 | 3 | 4 | 1 | 3 | 3 | 2 | 18 | 0.22 |
| 777 | 1 | 3 | 4 | 1 | 4 | 4 | 4 | 3 | 4 | 2 | 2 | 1 | 3 | 3 | 1 | 4 | 1 | 3 | 4 | 4 | 2 | 1 | 18 | 0.44 |
| 778 | 1 | 3 | 3 | 2 | 4 | 2 | 4 | 3 | 1 | 3 | 1 | 1 | 3 | 4 | 2 | 4 | 1 | 1 | 2 | 1 | 3 | 2 | 17 | 0.24 |
| 779 | 1 | 3 | 4 | 3 | 3 | 2 | 2 | 1 | 1 | 1 | 2 | 1 | 3 | 3 | 3 | 3 | 3 | 1 | 2 | 1 | 1 | 1 | 18 | 0.72 |
| 780 | 1 | 3 | 3 | 4 | 3 | 4 | 2 | 1 | 4 | 4 | 1 | 1 | 3 | 4 | 4 | 3 | 3 | 3 | 4 | 4 | 4 | 2 | 16 | 0.19 |
| 781 | 1 | 4 | 1 | 1 | 1 | 4 | 1 | 1 | 4 | 4 | 2 | 1 | 4 | 4 | 1 | 1 | 1 | 4 | 2 | 4 | 4 | 1 | 18 | 0.94 |
| 782 | 1 | 4 | 4 | 2 | 1 | 2 | 3 | 1 | 1 | 1 | 1 | 1 | 4 | 1 | 2 | 1 | 1 | 4 | 4 | 1 | 1 | 2 | 16 | 0.44 |
| 783 | 1 | 4 | 4 | 3 | 2 | 3 | 2 | 4 | 1 | 3 | 1 | 1 | 4 | 1 | 3 | 2 | 2 | 3 | 3 | 1 | 3 | 2 | 17 | 0.12 |
| 784 | 1 | 4 | 4 | 4 | 2 | 4 | 1 | 3 | 4 | 2 | 1 | 1 | 4 | 1 | 4 | 2 | 3 | 2 | 2 | 4 | 2 | 2 | 17 | 0.24 |
| 785 | 2 | 1 | 1 | 1 | 4 | 1 | 1 | 1 | 1 | 2 | 2 | 2 | 1 | 2 | 1 | 4 | 4 | 2 | 4 | 1 | 2 | 3 | 18 | 0.28 |
| 786 | 2 | 1 | 2 | 2 | 4 | 1 | 3 | 1 | 4 | 3 | 3 | 2 | 1 | 1 | 2 | 4 | 2 | 2 | 2 | 4 | 3 | 2 | 16 | 0.81 |
| 787 | 2 | 1 | 1 | 3 | 3 | 3 | 3 | 3 | 4 | 1 | 2 | 2 | 1 | 2 | 3 | 3 | 2 | 4 | 2 | 4 | 1 | 3 | 17 | 0.00 |
| 788 | 2 | 1 | 2 | 4 | 3 | 3 | 1 | 3 | 1 | 4 | 3 | 2 | 1 | 1 | 4 | 3 | 4 | 4 | 4 | 1 | 4 | 2 | 17 | 0.82 |
| 789 | 2 | 2 | 3 | 1 | 1 | 4 | 3 | 2 | 1 | 4 | 3 | 2 | 2 | 2 | 1 | 1 | 1 | 2 | 3 | 1 | 4 | 2 | 16 | 0.75 |
| 790 | 2 | 2 | 2 | 2 | 1 | 2 | 1 | 4 | 4 | 1 | 2 | 2 | 2 | 3 | 2 | 1 | 1 | 2 | 3 | 4 | 1 | 3 | 16 | 0.19 |
| 791 | 2 | 2 | 2 | 3 | 2 | 3 | 4 | 1 | 4 | 3 | 2 | 2 | 2 | 3 | 3 | 2 | 2 | 1 | 4 | 4 | 3 | 3 | 17 | 0.29 |
| 792 | 2 | 2 | 2 | 4 | 2 | 4 | 3 | 2 | 1 | 2 | 2 | 2 | 2 | 3 | 4 | 2 | 3 | 4 | 1 | 1 | 2 | 3 | 18 | 0.28 |
| 793 | 2 | 3 | 3 | 1 | 4 | 1 | 3 | 4 | 2 | 3 | 2 | 2 | 3 | 4 | 1 | 4 | 4 | 4 | 3 | 2 | 3 | 3 | 18 | 0.28 |
| 794 | 2 | 3 | 3 | 2 | 4 | 2 | 4 | 3 | 3 | 2 | 2 | 2 | 3 | 4 | 2 | 4 | 1 | 1 | 2 | 3 | 2 | 3 | 15 | 0.20 |
| 795 | 2 | 3 | 4 | 3 | 3 | 2 | 2 | 1 | 3 | 4 | 3 | 2 | 3 | 3 | 3 | 3 | 3 | 1 | 2 | 3 | 4 | 2 | 16 | 0.75 |

|     |   |   |   |   |   |   |   |   |   |   |   |   |   |   |   |   |   |   |   |   |   |   |    |      |
|-----|---|---|---|---|---|---|---|---|---|---|---|---|---|---|---|---|---|---|---|---|---|---|----|------|
| 796 | 2 | 3 | 4 | 4 | 3 | 3 | 3 | 4 | 2 | 1 | 3 | 2 | 3 | 3 | 4 | 3 | 4 | 2 | 1 | 2 | 1 | 2 | 18 | 0.61 |
| 797 | 2 | 4 | 1 | 1 | 1 | 4 | 1 | 1 | 2 | 1 | 3 | 2 | 4 | 4 | 1 | 1 | 1 | 4 | 2 | 2 | 1 | 2 | 17 | 0.88 |
| 798 | 2 | 4 | 4 | 2 | 1 | 2 | 3 | 1 | 3 | 4 | 2 | 2 | 4 | 1 | 2 | 1 | 1 | 4 | 4 | 3 | 4 | 3 | 17 | 0.18 |
| 799 | 2 | 4 | 4 | 3 | 2 | 3 | 2 | 4 | 3 | 2 | 2 | 2 | 4 | 1 | 3 | 2 | 2 | 3 | 3 | 3 | 2 | 3 | 17 | 0.12 |
| 800 | 2 | 4 | 4 | 4 | 2 | 4 | 1 | 3 | 2 | 3 | 2 | 2 | 4 | 1 | 4 | 2 | 3 | 2 | 2 | 2 | 3 | 3 | 18 | 0.11 |
| 801 | 3 | 1 | 2 | 1 | 2 | 4 | 2 | 4 | 1 | 4 | 4 | 3 | 1 | 1 | 1 | 2 | 1 | 1 | 1 | 1 | 4 | 3 | 15 | 0.80 |
| 802 | 3 | 1 | 2 | 2 | 2 | 1 | 3 | 1 | 4 | 1 | 4 | 3 | 1 | 1 | 2 | 2 | 2 | 2 | 2 | 4 | 1 | 3 | 18 | 0.72 |
| 803 | 3 | 1 | 1 | 3 | 1 | 3 | 3 | 3 | 4 | 3 | 3 | 3 | 1 | 2 | 3 | 1 | 2 | 4 | 2 | 4 | 3 | 4 | 17 | 0.12 |
| 804 | 3 | 1 | 2 | 4 | 1 | 3 | 1 | 3 | 1 | 2 | 4 | 3 | 1 | 1 | 4 | 1 | 4 | 4 | 4 | 1 | 2 | 3 | 18 | 1.00 |
| 805 | 3 | 2 | 2 | 1 | 3 | 1 | 2 | 3 | 1 | 2 | 3 | 3 | 2 | 3 | 1 | 3 | 4 | 3 | 2 | 1 | 2 | 4 | 17 | 0.35 |
| 806 | 3 | 2 | 2 | 2 | 3 | 2 | 1 | 4 | 4 | 3 | 3 | 3 | 2 | 3 | 2 | 3 | 1 | 2 | 3 | 4 | 3 | 4 | 18 | 0.33 |
| 807 | 3 | 2 | 2 | 3 | 4 | 3 | 4 | 1 | 4 | 1 | 3 | 3 | 2 | 3 | 3 | 4 | 2 | 1 | 4 | 4 | 1 | 4 | 18 | 0.33 |
| 808 | 3 | 2 | 2 | 4 | 4 | 4 | 3 | 2 | 1 | 4 | 3 | 3 | 2 | 3 | 4 | 4 | 3 | 4 | 1 | 1 | 4 | 4 | 16 | 0.38 |
| 809 | 3 | 3 | 3 | 1 | 2 | 1 | 3 | 4 | 2 | 1 | 3 | 3 | 3 | 4 | 1 | 2 | 4 | 4 | 3 | 2 | 1 | 4 | 17 | 0.41 |
| 810 | 3 | 3 | 3 | 2 | 2 | 2 | 4 | 3 | 3 | 4 | 3 | 3 | 3 | 4 | 2 | 2 | 1 | 1 | 2 | 3 | 4 | 4 | 16 | 0.25 |
| 811 | 3 | 3 | 4 | 3 | 1 | 2 | 2 | 1 | 3 | 2 | 4 | 3 | 3 | 3 | 3 | 1 | 3 | 1 | 2 | 3 | 2 | 3 | 18 | 0.78 |
| 812 | 3 | 3 | 4 | 4 | 1 | 3 | 3 | 4 | 2 | 3 | 4 | 3 | 3 | 3 | 4 | 1 | 4 | 2 | 1 | 2 | 3 | 3 | 17 | 0.65 |
| 813 | 3 | 4 | 4 | 1 | 3 | 1 | 4 | 2 | 2 | 3 | 3 | 3 | 4 | 1 | 1 | 3 | 4 | 1 | 1 | 2 | 3 | 4 | 16 | 0.19 |
| 814 | 3 | 4 | 1 | 2 | 3 | 1 | 4 | 4 | 3 | 2 | 4 | 3 | 4 | 4 | 2 | 3 | 2 | 3 | 1 | 3 | 2 | 3 | 18 | 0.78 |
| 815 | 3 | 4 | 4 | 3 | 4 | 3 | 2 | 4 | 3 | 4 | 3 | 3 | 4 | 1 | 3 | 4 | 2 | 3 | 3 | 3 | 4 | 4 | 18 | 0.06 |
| 816 | 3 | 4 | 4 | 4 | 4 | 4 | 1 | 3 | 2 | 1 | 3 | 3 | 4 | 1 | 4 | 4 | 3 | 2 | 2 | 2 | 1 | 4 | 17 | 0.06 |
| 817 | 4 | 1 | 1 | 1 | 2 | 1 | 1 | 1 | 3 | 1 | 4 | 4 | 1 | 2 | 1 | 2 | 4 | 2 | 4 | 3 | 1 | 1 | 18 | 0.94 |
| 818 | 4 | 1 | 1 | 2 | 2 | 2 | 2 | 2 | 2 | 4 | 4 | 4 | 1 | 2 | 2 | 2 | 1 | 3 | 1 | 2 | 4 | 1 | 17 | 0.94 |
| 819 | 4 | 1 | 1 | 3 | 1 | 3 | 3 | 3 | 2 | 2 | 4 | 4 | 1 | 2 | 3 | 1 | 2 | 4 | 2 | 2 | 2 | 1 | 17 | 0.88 |
| 820 | 4 | 1 | 1 | 4 | 1 | 4 | 4 | 4 | 3 | 3 | 4 | 4 | 1 | 2 | 4 | 1 | 3 | 1 | 3 | 3 | 3 | 1 | 15 | 0.87 |
| 821 | 4 | 2 | 3 | 1 | 3 | 4 | 3 | 2 | 3 | 3 | 1 | 4 | 2 | 2 | 1 | 3 | 1 | 2 | 3 | 3 | 3 | 4 | 16 | 0.13 |
| 822 | 4 | 2 | 2 | 2 | 3 | 2 | 1 | 4 | 2 | 2 | 4 | 4 | 2 | 3 | 2 | 3 | 1 | 2 | 3 | 2 | 2 | 1 | 17 | 0.88 |
| 823 | 4 | 2 | 3 | 3 | 4 | 2 | 1 | 4 | 2 | 4 | 1 | 4 | 2 | 2 | 3 | 4 | 3 | 4 | 1 | 2 | 4 | 4 | 18 | 0.06 |
| 824 | 4 | 2 | 2 | 4 | 4 | 4 | 3 | 2 | 3 | 1 | 4 | 4 | 2 | 3 | 4 | 4 | 3 | 4 | 1 | 3 | 1 | 1 | 18 | 1.00 |
| 825 | 4 | 3 | 4 | 1 | 2 | 4 | 4 | 3 | 4 | 4 | 1 | 4 | 3 | 3 | 1 | 2 | 1 | 3 | 4 | 4 | 4 | 4 | 18 | 0.06 |
| 826 | 4 | 3 | 4 | 2 | 2 | 1 | 1 | 2 | 1 | 1 | 1 | 4 | 3 | 3 | 2 | 2 | 2 | 4 | 3 | 1 | 1 | 4 | 18 | 0.39 |
| 827 | 4 | 3 | 4 | 3 | 1 | 2 | 2 | 1 | 1 | 3 | 1 | 4 | 3 | 3 | 3 | 1 | 3 | 1 | 2 | 1 | 3 | 4 | 17 | 0.06 |

|     |   |   |   |   |   |   |   |   |   |   |   |   |   |   |   |   |   |   |   |   |   |   |    |      |
|-----|---|---|---|---|---|---|---|---|---|---|---|---|---|---|---|---|---|---|---|---|---|---|----|------|
| 828 | 4 | 3 | 3 | 4 | 1 | 4 | 2 | 1 | 4 | 2 | 4 | 4 | 3 | 4 | 4 | 1 | 3 | 3 | 4 | 4 | 2 | 1 | 18 | 0.94 |
| 829 | 4 | 4 | 1 | 1 | 3 | 4 | 1 | 1 | 4 | 2 | 1 | 4 | 4 | 4 | 1 | 3 | 1 | 4 | 2 | 4 | 2 | 4 | 17 | 0.41 |
| 830 | 4 | 4 | 4 | 2 | 3 | 2 | 3 | 1 | 1 | 3 | 4 | 4 | 4 | 1 | 2 | 3 | 1 | 4 | 4 | 1 | 3 | 1 | 18 | 0.89 |
| 831 | 4 | 4 | 1 | 3 | 4 | 2 | 3 | 3 | 1 | 1 | 1 | 4 | 4 | 4 | 3 | 4 | 3 | 2 | 4 | 1 | 1 | 4 | 18 | 0.22 |
| 832 | 4 | 4 | 1 | 4 | 4 | 3 | 2 | 2 | 4 | 4 | 1 | 4 | 4 | 4 | 4 | 4 | 4 | 1 | 3 | 4 | 4 | 4 | 19 | 0.42 |
| 833 | 1 | 1 | 1 | 1 | 1 | 1 | 4 | 3 | 1 | 3 | 1 | 1 | 1 | 1 | 2 | 4 | 2 | 4 | 3 | 4 | 3 | 2 | 16 | 0.44 |
| 834 | 1 | 1 | 2 | 1 | 2 | 2 | 4 | 2 | 2 | 2 | 1 | 1 | 1 | 2 | 2 | 1 | 3 | 4 | 2 | 1 | 2 | 2 | 18 | 0.11 |
| 835 | 1 | 1 | 3 | 1 | 3 | 3 | 3 | 2 | 3 | 4 | 1 | 1 | 1 | 3 | 2 | 2 | 4 | 3 | 2 | 2 | 4 | 2 | 17 | 0.18 |
| 836 | 1 | 1 | 4 | 1 | 4 | 4 | 3 | 3 | 4 | 1 | 1 | 1 | 1 | 4 | 2 | 3 | 1 | 3 | 3 | 3 | 1 | 2 | 18 | 0.17 |
| 837 | 1 | 2 | 1 | 2 | 1 | 2 | 1 | 3 | 3 | 1 | 1 | 1 | 2 | 1 | 3 | 4 | 3 | 1 | 3 | 2 | 1 | 2 | 17 | 0.35 |
| 838 | 1 | 2 | 2 | 3 | 1 | 2 | 1 | 2 | 3 | 4 | 2 | 1 | 2 | 2 | 2 | 2 | 1 | 1 | 2 | 4 | 4 | 1 | 16 | 0.69 |
| 839 | 1 | 2 | 3 | 3 | 2 | 1 | 2 | 2 | 4 | 2 | 2 | 1 | 2 | 3 | 2 | 3 | 4 | 2 | 2 | 1 | 2 | 1 | 16 | 0.56 |
| 840 | 1 | 2 | 4 | 3 | 3 | 4 | 2 | 3 | 1 | 3 | 2 | 1 | 2 | 4 | 2 | 4 | 3 | 2 | 3 | 2 | 3 | 1 | 16 | 0.88 |
| 841 | 1 | 3 | 1 | 3 | 1 | 3 | 4 | 4 | 4 | 2 | 1 | 1 | 3 | 1 | 4 | 4 | 4 | 4 | 4 | 3 | 2 | 2 | 17 | 0.59 |
| 842 | 1 | 3 | 2 | 3 | 2 | 4 | 4 | 1 | 3 | 3 | 1 | 1 | 3 | 2 | 4 | 1 | 1 | 4 | 1 | 2 | 3 | 2 | 17 | 0.06 |
| 843 | 1 | 3 | 3 | 3 | 3 | 1 | 3 | 1 | 2 | 1 | 1 | 1 | 3 | 3 | 4 | 2 | 2 | 3 | 1 | 1 | 1 | 2 | 15 | 0.20 |
| 844 | 1 | 3 | 4 | 3 | 4 | 2 | 3 | 4 | 1 | 4 | 1 | 1 | 3 | 4 | 4 | 3 | 3 | 3 | 4 | 4 | 4 | 2 | 16 | 0.38 |
| 845 | 1 | 4 | 1 | 4 | 1 | 4 | 1 | 4 | 2 | 4 | 1 | 1 | 4 | 1 | 1 | 4 | 1 | 1 | 4 | 1 | 4 | 2 | 18 | 0.28 |
| 846 | 1 | 4 | 2 | 1 | 1 | 4 | 1 | 1 | 4 | 1 | 2 | 1 | 4 | 2 | 4 | 2 | 3 | 1 | 1 | 1 | 1 | 1 | 17 | 0.82 |
| 847 | 1 | 4 | 3 | 1 | 2 | 3 | 2 | 1 | 3 | 3 | 2 | 1 | 4 | 3 | 4 | 3 | 2 | 2 | 1 | 4 | 3 | 1 | 17 | 1.00 |
| 848 | 1 | 4 | 4 | 4 | 4 | 1 | 2 | 4 | 3 | 2 | 1 | 1 | 4 | 4 | 1 | 3 | 2 | 2 | 4 | 2 | 2 | 2 | 18 | 0.06 |
| 849 | 2 | 1 | 1 | 1 | 1 | 1 | 4 | 1 | 1 | 2 | 2 | 2 | 1 | 1 | 2 | 4 | 2 | 4 | 1 | 4 | 2 | 3 | 16 | 0.63 |
| 850 | 2 | 1 | 2 | 1 | 2 | 2 | 4 | 4 | 2 | 3 | 2 | 2 | 1 | 2 | 2 | 1 | 3 | 4 | 4 | 1 | 3 | 3 | 17 | 0.06 |
| 851 | 2 | 1 | 3 | 1 | 3 | 3 | 3 | 4 | 3 | 1 | 2 | 2 | 1 | 3 | 2 | 2 | 4 | 3 | 4 | 2 | 1 | 3 | 16 | 0.06 |
| 852 | 2 | 1 | 4 | 1 | 4 | 4 | 3 | 1 | 4 | 4 | 2 | 2 | 1 | 4 | 2 | 3 | 1 | 3 | 1 | 3 | 4 | 3 | 18 | 0.17 |
| 853 | 2 | 2 | 1 | 2 | 1 | 2 | 1 | 1 | 3 | 4 | 2 | 2 | 2 | 1 | 3 | 4 | 3 | 1 | 1 | 2 | 4 | 3 | 18 | 0.56 |
| 854 | 2 | 2 | 2 | 2 | 2 | 1 | 1 | 4 | 4 | 1 | 2 | 2 | 2 | 2 | 3 | 1 | 2 | 1 | 4 | 3 | 1 | 3 | 18 | 0.33 |
| 855 | 2 | 2 | 3 | 2 | 3 | 4 | 2 | 4 | 1 | 3 | 2 | 2 | 2 | 3 | 3 | 2 | 1 | 2 | 4 | 4 | 3 | 3 | 18 | 0.17 |
| 856 | 2 | 2 | 4 | 2 | 4 | 3 | 2 | 1 | 2 | 2 | 2 | 2 | 2 | 4 | 3 | 3 | 4 | 2 | 1 | 1 | 2 | 3 | 17 | 0.12 |
| 857 | 2 | 3 | 1 | 3 | 1 | 3 | 4 | 2 | 4 | 3 | 2 | 2 | 3 | 1 | 4 | 4 | 4 | 4 | 2 | 3 | 3 | 3 | 18 | 0.44 |
| 858 | 2 | 3 | 2 | 3 | 2 | 4 | 4 | 3 | 3 | 2 | 2 | 2 | 3 | 2 | 4 | 1 | 1 | 4 | 3 | 2 | 2 | 3 | 18 | 0.17 |
| 859 | 2 | 3 | 3 | 4 | 2 | 2 | 3 | 3 | 1 | 4 | 3 | 2 | 3 | 3 | 3 | 3 | 1 | 3 | 3 | 2 | 4 | 2 | 18 | 0.89 |

|     |   |   |   |   |   |   |   |   |   |   |   |   |   |   |   |   |   |   |   |   |   |   |    |      |
|-----|---|---|---|---|---|---|---|---|---|---|---|---|---|---|---|---|---|---|---|---|---|---|----|------|
| 860 | 2 | 3 | 4 | 3 | 4 | 2 | 3 | 2 | 1 | 1 | 2 | 2 | 3 | 4 | 4 | 3 | 3 | 3 | 2 | 4 | 1 | 3 | 18 | 0.33 |
| 861 | 2 | 4 | 1 | 1 | 4 | 1 | 1 | 2 | 1 | 1 | 3 | 2 | 4 | 1 | 4 | 1 | 4 | 1 | 2 | 2 | 1 | 2 | 17 | 0.88 |
| 862 | 2 | 4 | 2 | 4 | 2 | 3 | 1 | 3 | 1 | 4 | 2 | 2 | 4 | 2 | 1 | 1 | 4 | 1 | 3 | 4 | 4 | 3 | 17 | 0.06 |
| 863 | 2 | 4 | 3 | 4 | 3 | 2 | 2 | 3 | 4 | 2 | 2 | 2 | 4 | 3 | 1 | 2 | 3 | 2 | 3 | 3 | 2 | 3 | 16 | 0.06 |
| 864 | 2 | 4 | 4 | 1 | 3 | 2 | 2 | 2 | 2 | 3 | 3 | 2 | 4 | 4 | 4 | 4 | 1 | 2 | 2 | 3 | 3 | 2 | 16 | 0.75 |
| 865 | 3 | 1 | 1 | 1 | 1 | 1 | 2 | 1 | 1 | 4 | 3 | 3 | 1 | 1 | 2 | 4 | 2 | 2 | 1 | 4 | 4 | 4 | 16 | 0.50 |
| 866 | 3 | 1 | 2 | 1 | 2 | 2 | 2 | 4 | 2 | 1 | 3 | 3 | 1 | 2 | 2 | 1 | 3 | 2 | 4 | 1 | 1 | 4 | 17 | 0.12 |
| 867 | 3 | 1 | 3 | 2 | 2 | 4 | 1 | 4 | 2 | 3 | 4 | 3 | 1 | 3 | 1 | 3 | 3 | 1 | 4 | 3 | 3 | 3 | 18 | 0.83 |
| 868 | 3 | 1 | 4 | 1 | 4 | 4 | 1 | 1 | 4 | 2 | 3 | 3 | 1 | 4 | 2 | 3 | 1 | 1 | 1 | 3 | 2 | 4 | 17 | 0.18 |
| 869 | 3 | 2 | 1 | 2 | 1 | 2 | 3 | 1 | 3 | 2 | 3 | 3 | 2 | 1 | 3 | 4 | 3 | 3 | 1 | 2 | 2 | 4 | 18 | 0.39 |
| 870 | 3 | 2 | 2 | 2 | 2 | 1 | 3 | 4 | 4 | 3 | 3 | 3 | 2 | 2 | 3 | 1 | 2 | 3 | 4 | 3 | 3 | 4 | 16 | 0.25 |
| 871 | 3 | 2 | 3 | 2 | 3 | 4 | 4 | 4 | 1 | 1 | 3 | 3 | 2 | 3 | 3 | 2 | 1 | 4 | 4 | 4 | 1 | 4 | 17 | 0.47 |
| 872 | 3 | 2 | 4 | 3 | 3 | 4 | 4 | 1 | 1 | 4 | 4 | 3 | 2 | 4 | 2 | 4 | 3 | 4 | 1 | 2 | 4 | 3 | 18 | 0.61 |
| 873 | 3 | 3 | 1 | 4 | 4 | 4 | 2 | 2 | 3 | 1 | 4 | 3 | 3 | 1 | 3 | 1 | 3 | 2 | 2 | 4 | 1 | 3 | 18 | 0.67 |
| 874 | 3 | 3 | 2 | 4 | 1 | 1 | 2 | 3 | 2 | 4 | 4 | 3 | 3 | 2 | 3 | 2 | 4 | 2 | 3 | 3 | 4 | 3 | 16 | 0.88 |
| 875 | 3 | 3 | 3 | 4 | 2 | 2 | 1 | 3 | 1 | 2 | 4 | 3 | 3 | 3 | 3 | 3 | 1 | 1 | 3 | 2 | 2 | 3 | 18 | 0.89 |
| 876 | 3 | 3 | 4 | 3 | 4 | 2 | 1 | 2 | 1 | 3 | 3 | 3 | 3 | 4 | 4 | 3 | 3 | 1 | 2 | 4 | 3 | 4 | 15 | 0.40 |
| 877 | 3 | 4 | 1 | 4 | 1 | 4 | 3 | 2 | 2 | 3 | 3 | 3 | 4 | 1 | 1 | 4 | 1 | 3 | 2 | 1 | 3 | 4 | 18 | 0.17 |
| 878 | 3 | 4 | 2 | 4 | 2 | 3 | 3 | 3 | 1 | 2 | 3 | 3 | 4 | 2 | 1 | 1 | 4 | 3 | 3 | 4 | 2 | 4 | 17 | 0.24 |
| 879 | 3 | 4 | 3 | 4 | 3 | 2 | 4 | 3 | 4 | 4 | 3 | 3 | 4 | 3 | 1 | 2 | 3 | 4 | 3 | 3 | 4 | 4 | 17 | 0.12 |
| 880 | 3 | 4 | 4 | 1 | 3 | 2 | 4 | 2 | 2 | 1 | 4 | 3 | 4 | 4 | 4 | 4 | 1 | 4 | 2 | 3 | 1 | 3 | 17 | 0.82 |
| 881 | 4 | 1 | 1 | 2 | 4 | 2 | 2 | 3 | 4 | 1 | 1 | 4 | 1 | 1 | 1 | 1 | 1 | 2 | 3 | 1 | 1 | 4 | 18 | 0.00 |
| 882 | 4 | 1 | 2 | 2 | 1 | 3 | 2 | 2 | 1 | 4 | 1 | 4 | 1 | 2 | 1 | 2 | 2 | 2 | 2 | 2 | 4 | 4 | 18 | 0.11 |
| 883 | 4 | 1 | 3 | 1 | 3 | 3 | 1 | 2 | 3 | 2 | 4 | 4 | 1 | 3 | 2 | 2 | 4 | 1 | 2 | 2 | 2 | 1 | 16 | 0.94 |
| 884 | 4 | 1 | 4 | 2 | 3 | 1 | 1 | 3 | 3 | 3 | 1 | 4 | 1 | 4 | 1 | 4 | 4 | 1 | 3 | 4 | 3 | 4 | 18 | 0.28 |
| 885 | 4 | 2 | 1 | 3 | 4 | 3 | 3 | 3 | 2 | 3 | 1 | 4 | 2 | 1 | 2 | 1 | 2 | 3 | 3 | 3 | 3 | 4 | 17 | 0.06 |
| 886 | 4 | 2 | 2 | 2 | 2 | 1 | 3 | 2 | 4 | 2 | 4 | 4 | 2 | 2 | 3 | 1 | 2 | 3 | 2 | 3 | 2 | 1 | 15 | 0.67 |
| 887 | 4 | 2 | 3 | 3 | 2 | 1 | 4 | 2 | 4 | 4 | 1 | 4 | 2 | 3 | 2 | 3 | 4 | 4 | 2 | 1 | 4 | 4 | 17 | 0.29 |
| 888 | 4 | 2 | 4 | 3 | 3 | 4 | 4 | 3 | 1 | 1 | 1 | 4 | 2 | 4 | 2 | 4 | 3 | 4 | 3 | 2 | 1 | 4 | 17 | 0.18 |
| 889 | 4 | 3 | 1 | 4 | 4 | 4 | 2 | 4 | 3 | 4 | 1 | 4 | 3 | 1 | 3 | 1 | 3 | 2 | 4 | 4 | 4 | 4 | 18 | 0.28 |
| 890 | 4 | 3 | 2 | 4 | 1 | 1 | 2 | 1 | 2 | 1 | 1 | 4 | 3 | 2 | 3 | 2 | 4 | 2 | 1 | 3 | 1 | 4 | 18 | 0.17 |
| 891 | 4 | 3 | 3 | 3 | 3 | 1 | 1 | 1 | 2 | 3 | 4 | 4 | 3 | 3 | 4 | 2 | 2 | 1 | 1 | 1 | 3 | 1 | 18 | 0.72 |

|     |   |   |   |   |   |   |   |   |   |   |   |   |   |   |   |   |   |   |   |   |   |   |    |      |
|-----|---|---|---|---|---|---|---|---|---|---|---|---|---|---|---|---|---|---|---|---|---|---|----|------|
| 892 | 4 | 3 | 4 | 3 | 4 | 2 | 1 | 4 | 1 | 2 | 4 | 4 | 3 | 4 | 4 | 3 | 3 | 1 | 4 | 4 | 2 | 1 | 18 | 0.89 |
| 893 | 4 | 4 | 1 | 4 | 1 | 4 | 3 | 4 | 2 | 2 | 4 | 4 | 4 | 1 | 1 | 4 | 1 | 3 | 4 | 1 | 2 | 1 | 17 | 0.65 |
| 894 | 4 | 4 | 2 | 1 | 1 | 4 | 3 | 1 | 4 | 3 | 1 | 4 | 4 | 2 | 4 | 2 | 3 | 3 | 1 | 1 | 3 | 4 | 17 | 0.24 |
| 895 | 4 | 4 | 3 | 4 | 3 | 2 | 4 | 1 | 4 | 1 | 4 | 4 | 4 | 3 | 1 | 2 | 3 | 4 | 1 | 3 | 1 | 1 | 18 | 0.78 |
| 896 | 4 | 4 | 4 | 1 | 3 | 2 | 4 | 4 | 2 | 4 | 1 | 4 | 4 | 4 | 4 | 4 | 1 | 4 | 4 | 3 | 4 | 4 | 17 | 0.35 |
| 897 | 1 | 1 | 1 | 1 | 1 | 4 | 1 | 1 | 3 | 3 | 1 | 1 | 1 | 1 | 2 | 4 | 4 | 2 | 4 | 3 | 3 | 2 | 15 | 0.53 |
| 898 | 1 | 1 | 2 | 2 | 1 | 4 | 3 | 1 | 2 | 2 | 2 | 1 | 1 | 2 | 1 | 2 | 4 | 2 | 2 | 2 | 2 | 1 | 17 | 0.82 |
| 899 | 1 | 1 | 3 | 1 | 3 | 3 | 3 | 3 | 2 | 4 | 1 | 1 | 1 | 3 | 2 | 2 | 3 | 4 | 2 | 2 | 4 | 2 | 17 | 0.12 |
| 900 | 1 | 1 | 4 | 1 | 4 | 3 | 4 | 4 | 3 | 1 | 1 | 1 | 1 | 4 | 2 | 3 | 3 | 1 | 3 | 3 | 1 | 2 | 17 | 0.18 |
| 901 | 1 | 2 | 1 | 2 | 1 | 1 | 2 | 3 | 3 | 1 | 1 | 1 | 2 | 1 | 3 | 4 | 1 | 3 | 2 | 3 | 1 | 2 | 17 | 0.53 |
| 902 | 1 | 2 | 2 | 2 | 2 | 1 | 1 | 4 | 2 | 4 | 1 | 1 | 2 | 2 | 3 | 1 | 1 | 2 | 3 | 2 | 4 | 2 | 17 | 0.35 |
| 903 | 1 | 2 | 3 | 2 | 3 | 2 | 4 | 1 | 2 | 2 | 1 | 1 | 2 | 3 | 3 | 2 | 2 | 1 | 4 | 2 | 2 | 2 | 18 | 0.39 |
| 904 | 1 | 2 | 4 | 3 | 3 | 2 | 4 | 1 | 3 | 3 | 2 | 1 | 2 | 4 | 2 | 4 | 2 | 3 | 2 | 3 | 3 | 1 | 16 | 0.69 |
| 905 | 1 | 3 | 1 | 4 | 4 | 4 | 4 | 3 | 4 | 2 | 2 | 1 | 3 | 1 | 3 | 1 | 4 | 3 | 4 | 4 | 2 | 1 | 18 | 0.44 |
| 906 | 1 | 3 | 2 | 3 | 2 | 4 | 4 | 3 | 1 | 3 | 1 | 1 | 3 | 2 | 4 | 1 | 4 | 1 | 2 | 1 | 3 | 2 | 18 | 0.22 |
| 907 | 1 | 3 | 3 | 4 | 2 | 3 | 2 | 1 | 1 | 1 | 2 | 1 | 3 | 3 | 3 | 3 | 3 | 1 | 2 | 1 | 1 | 1 | 18 | 0.72 |
| 908 | 1 | 3 | 4 | 4 | 3 | 3 | 3 | 4 | 4 | 4 | 2 | 1 | 3 | 4 | 3 | 4 | 3 | 2 | 1 | 4 | 4 | 1 | 18 | 0.61 |
| 909 | 1 | 4 | 1 | 1 | 4 | 1 | 1 | 1 | 4 | 4 | 2 | 1 | 4 | 1 | 4 | 1 | 1 | 4 | 2 | 4 | 4 | 1 | 17 | 0.76 |
| 910 | 1 | 4 | 2 | 1 | 1 | 1 | 4 | 4 | 1 | 1 | 2 | 1 | 4 | 2 | 4 | 2 | 1 | 3 | 1 | 1 | 1 | 1 | 18 | 0.83 |
| 911 | 1 | 4 | 3 | 1 | 2 | 2 | 3 | 3 | 1 | 3 | 2 | 1 | 4 | 3 | 4 | 3 | 2 | 2 | 4 | 1 | 3 | 1 | 18 | 0.94 |
| 912 | 1 | 4 | 4 | 4 | 4 | 2 | 1 | 3 | 4 | 2 | 1 | 1 | 4 | 4 | 1 | 3 | 2 | 2 | 2 | 4 | 2 | 2 | 18 | 0.17 |
| 913 | 2 | 1 | 1 | 2 | 4 | 4 | 2 | 4 | 1 | 2 | 3 | 2 | 1 | 1 | 1 | 1 | 4 | 1 | 1 | 1 | 2 | 2 | 18 | 0.67 |
| 914 | 2 | 1 | 2 | 1 | 2 | 4 | 2 | 2 | 4 | 3 | 2 | 2 | 1 | 2 | 2 | 1 | 4 | 3 | 1 | 4 | 3 | 3 | 17 | 0.24 |
| 915 | 2 | 1 | 3 | 1 | 3 | 3 | 3 | 3 | 4 | 1 | 2 | 2 | 1 | 3 | 2 | 2 | 3 | 4 | 2 | 4 | 1 | 3 | 18 | 0.17 |
| 916 | 2 | 1 | 4 | 1 | 4 | 3 | 4 | 4 | 1 | 4 | 2 | 2 | 1 | 4 | 2 | 3 | 3 | 1 | 3 | 1 | 4 | 3 | 18 | 0.33 |
| 917 | 2 | 2 | 1 | 3 | 4 | 1 | 3 | 2 | 1 | 4 | 3 | 2 | 2 | 1 | 2 | 1 | 1 | 2 | 3 | 1 | 4 | 2 | 17 | 0.59 |
| 918 | 2 | 2 | 2 | 2 | 2 | 1 | 1 | 4 | 4 | 1 | 2 | 2 | 2 | 2 | 3 | 1 | 1 | 2 | 3 | 4 | 1 | 3 | 17 | 0.24 |
| 919 | 2 | 2 | 3 | 2 | 3 | 2 | 4 | 1 | 4 | 3 | 2 | 2 | 2 | 3 | 3 | 2 | 2 | 1 | 4 | 4 | 3 | 3 | 17 | 0.18 |
| 920 | 2 | 2 | 4 | 2 | 4 | 2 | 3 | 2 | 1 | 2 | 2 | 2 | 2 | 4 | 3 | 3 | 2 | 4 | 1 | 1 | 2 | 3 | 18 | 0.44 |
| 921 | 2 | 3 | 1 | 4 | 4 | 4 | 4 | 3 | 2 | 3 | 3 | 2 | 3 | 1 | 3 | 1 | 4 | 3 | 4 | 2 | 3 | 2 | 18 | 0.50 |
| 922 | 2 | 3 | 2 | 4 | 1 | 4 | 1 | 2 | 3 | 2 | 3 | 2 | 3 | 2 | 3 | 2 | 4 | 4 | 3 | 3 | 2 | 2 | 18 | 0.67 |
| 923 | 2 | 3 | 3 | 3 | 3 | 3 | 1 | 2 | 3 | 4 | 2 | 2 | 3 | 3 | 4 | 2 | 3 | 2 | 1 | 3 | 4 | 3 | 18 | 0.39 |

|     |   |   |   |   |   |   |   |   |   |   |   |   |   |   |   |   |   |   |   |   |   |   |    |      |
|-----|---|---|---|---|---|---|---|---|---|---|---|---|---|---|---|---|---|---|---|---|---|---|----|------|
| 924 | 2 | 3 | 4 | 3 | 4 | 3 | 2 | 1 | 2 | 1 | 2 | 2 | 3 | 4 | 4 | 3 | 3 | 3 | 4 | 2 | 1 | 3 | 17 | 0.53 |
| 925 | 2 | 4 | 1 | 1 | 4 | 1 | 1 | 1 | 2 | 1 | 3 | 2 | 4 | 1 | 4 | 1 | 1 | 4 | 2 | 2 | 1 | 2 | 16 | 0.69 |
| 926 | 2 | 4 | 2 | 1 | 1 | 1 | 4 | 4 | 3 | 4 | 3 | 2 | 4 | 2 | 4 | 2 | 1 | 3 | 1 | 3 | 4 | 2 | 17 | 0.76 |
| 927 | 2 | 4 | 3 | 4 | 3 | 2 | 2 | 4 | 3 | 2 | 2 | 2 | 4 | 3 | 1 | 2 | 2 | 3 | 3 | 3 | 2 | 3 | 16 | 0.00 |
| 928 | 2 | 4 | 4 | 1 | 3 | 2 | 2 | 2 | 2 | 3 | 3 | 2 | 4 | 4 | 4 | 4 | 2 | 1 | 3 | 2 | 3 | 2 | 17 | 0.76 |
| 929 | 3 | 1 | 1 | 2 | 4 | 2 | 2 | 4 | 1 | 4 | 4 | 3 | 1 | 1 | 1 | 1 | 2 | 1 | 1 | 1 | 4 | 3 | 17 | 0.35 |
| 930 | 3 | 1 | 2 | 1 | 2 | 2 | 2 | 2 | 4 | 1 | 3 | 3 | 1 | 2 | 2 | 1 | 2 | 3 | 1 | 4 | 1 | 4 | 18 | 0.11 |
| 931 | 3 | 1 | 3 | 1 | 3 | 1 | 3 | 3 | 4 | 3 | 3 | 3 | 1 | 3 | 2 | 2 | 1 | 4 | 2 | 4 | 3 | 4 | 18 | 0.22 |
| 932 | 3 | 1 | 4 | 1 | 4 | 1 | 4 | 4 | 1 | 2 | 3 | 3 | 1 | 4 | 2 | 3 | 1 | 1 | 3 | 1 | 2 | 4 | 16 | 0.06 |
| 933 | 3 | 2 | 1 | 3 | 4 | 3 | 3 | 2 | 1 | 2 | 4 | 3 | 2 | 1 | 2 | 1 | 3 | 2 | 3 | 1 | 2 | 3 | 18 | 0.44 |
| 934 | 3 | 2 | 2 | 3 | 1 | 3 | 2 | 3 | 4 | 3 | 4 | 3 | 2 | 2 | 2 | 2 | 3 | 1 | 4 | 4 | 3 | 3 | 18 | 0.67 |
| 935 | 3 | 2 | 3 | 3 | 2 | 4 | 1 | 4 | 4 | 1 | 4 | 3 | 2 | 3 | 2 | 3 | 4 | 4 | 1 | 4 | 1 | 3 | 17 | 0.76 |
| 936 | 3 | 2 | 4 | 3 | 3 | 4 | 4 | 1 | 1 | 4 | 4 | 3 | 2 | 4 | 2 | 4 | 4 | 3 | 2 | 1 | 4 | 3 | 18 | 0.50 |
| 937 | 3 | 3 | 1 | 3 | 1 | 2 | 3 | 4 | 2 | 1 | 3 | 3 | 3 | 1 | 4 | 4 | 2 | 4 | 3 | 2 | 1 | 4 | 17 | 0.53 |
| 938 | 3 | 3 | 2 | 3 | 2 | 2 | 4 | 3 | 3 | 4 | 3 | 3 | 3 | 2 | 4 | 1 | 2 | 1 | 2 | 3 | 4 | 4 | 18 | 0.39 |
| 939 | 3 | 3 | 3 | 3 | 3 | 1 | 1 | 2 | 3 | 2 | 3 | 3 | 3 | 3 | 4 | 2 | 1 | 2 | 1 | 3 | 2 | 4 | 17 | 0.24 |
| 940 | 3 | 3 | 4 | 4 | 3 | 1 | 3 | 4 | 2 | 3 | 4 | 3 | 3 | 4 | 3 | 4 | 1 | 2 | 1 | 2 | 3 | 3 | 17 | 0.53 |
| 941 | 3 | 4 | 1 | 1 | 4 | 3 | 1 | 1 | 2 | 3 | 4 | 3 | 4 | 1 | 4 | 1 | 3 | 4 | 2 | 2 | 3 | 3 | 17 | 0.94 |
| 942 | 3 | 4 | 2 | 4 | 2 | 3 | 3 | 1 | 3 | 2 | 3 | 3 | 4 | 2 | 1 | 1 | 3 | 4 | 4 | 3 | 2 | 4 | 17 | 0.18 |
| 943 | 3 | 4 | 3 | 4 | 3 | 4 | 2 | 4 | 3 | 4 | 3 | 3 | 4 | 3 | 1 | 2 | 4 | 3 | 3 | 3 | 4 | 4 | 17 | 0.12 |
| 944 | 3 | 4 | 4 | 1 | 3 | 4 | 2 | 2 | 2 | 1 | 4 | 3 | 4 | 4 | 4 | 4 | 4 | 1 | 3 | 2 | 1 | 3 | 18 | 0.83 |
| 945 | 4 | 1 | 1 | 2 | 4 | 2 | 2 | 4 | 3 | 1 | 1 | 4 | 1 | 1 | 1 | 1 | 2 | 1 | 1 | 3 | 1 | 4 | 17 | 0.18 |
| 946 | 4 | 1 | 2 | 2 | 1 | 2 | 3 | 1 | 2 | 4 | 1 | 4 | 1 | 2 | 1 | 2 | 2 | 2 | 2 | 2 | 4 | 4 | 17 | 0.06 |
| 947 | 4 | 1 | 3 | 1 | 3 | 1 | 3 | 3 | 2 | 2 | 4 | 4 | 1 | 3 | 2 | 2 | 1 | 4 | 2 | 2 | 2 | 1 | 16 | 0.88 |
| 948 | 4 | 1 | 4 | 1 | 4 | 1 | 4 | 4 | 3 | 3 | 4 | 4 | 1 | 4 | 2 | 3 | 1 | 1 | 3 | 3 | 3 | 1 | 17 | 0.76 |
| 949 | 4 | 2 | 1 | 2 | 1 | 3 | 2 | 3 | 3 | 3 | 4 | 4 | 2 | 1 | 3 | 4 | 3 | 3 | 2 | 3 | 3 | 1 | 17 | 0.71 |
| 950 | 4 | 2 | 2 | 3 | 1 | 3 | 2 | 3 | 2 | 2 | 1 | 4 | 2 | 2 | 2 | 2 | 3 | 1 | 4 | 2 | 2 | 4 | 16 | 0.13 |
| 951 | 4 | 2 | 3 | 2 | 3 | 4 | 4 | 1 | 2 | 4 | 4 | 4 | 2 | 3 | 3 | 2 | 4 | 1 | 4 | 2 | 4 | 1 | 18 | 0.83 |
| 952 | 4 | 2 | 4 | 2 | 4 | 4 | 3 | 2 | 3 | 1 | 4 | 4 | 2 | 4 | 3 | 3 | 4 | 4 | 1 | 3 | 1 | 1 | 17 | 0.76 |
| 953 | 4 | 3 | 1 | 3 | 1 | 2 | 3 | 4 | 4 | 4 | 4 | 4 | 3 | 1 | 4 | 4 | 2 | 4 | 3 | 4 | 4 | 1 | 18 | 0.89 |
| 954 | 4 | 3 | 2 | 3 | 2 | 2 | 4 | 3 | 1 | 1 | 4 | 4 | 3 | 2 | 4 | 1 | 2 | 1 | 2 | 1 | 1 | 1 | 18 | 0.78 |
| 955 | 4 | 3 | 3 | 4 | 2 | 1 | 2 | 1 | 1 | 3 | 1 | 4 | 3 | 3 | 3 | 3 | 1 | 1 | 2 | 1 | 3 | 4 | 18 | 0.22 |

|     |   |   |   |   |   |   |   |   |   |   |   |   |   |   |   |   |   |   |   |   |   |   |    |      |
|-----|---|---|---|---|---|---|---|---|---|---|---|---|---|---|---|---|---|---|---|---|---|---|----|------|
| 956 | 4 | 3 | 4 | 4 | 3 | 1 | 3 | 4 | 4 | 2 | 1 | 4 | 3 | 4 | 3 | 4 | 1 | 2 | 1 | 4 | 2 | 4 | 17 | 0.06 |
| 957 | 4 | 4 | 1 | 1 | 4 | 3 | 1 | 1 | 4 | 2 | 1 | 4 | 4 | 1 | 4 | 1 | 3 | 4 | 2 | 4 | 2 | 4 | 19 | 0.21 |
| 958 | 4 | 4 | 2 | 1 | 1 | 3 | 4 | 4 | 1 | 3 | 1 | 4 | 4 | 2 | 4 | 2 | 3 | 3 | 1 | 1 | 3 | 4 | 18 | 0.22 |
| 959 | 4 | 4 | 3 | 4 | 3 | 4 | 2 | 4 | 1 | 1 | 4 | 4 | 4 | 3 | 1 | 2 | 4 | 3 | 3 | 1 | 1 | 1 | 17 | 0.59 |
| 960 | 4 | 4 | 4 | 4 | 4 | 4 | 1 | 3 | 4 | 4 | 4 | 4 | 4 | 4 | 1 | 3 | 4 | 2 | 2 | 4 | 4 | 1 | 17 | 0.65 |
