# Supplementary material for: Australian Utility Weights for the EORTC QLU-C10D, a Multi-Attribute Utility Instrument Derived from the Cancer-Specific Quality of Life Questionnaire, EORTC QLQ-C30
Source: Springer Nature journal article supplement (doi:10.1007/s40273-017-0582-5), 2017-12-21
Supplement: MOESM2 [file 24130396]

**Australian utility weights for the EORTC QLU-C10D, a multi-attribute utility instrument derived from the cancer-specific quality of life questionnaire, EORTC QLQ-C30**

***Pharmacoeconomics***

\*Madeleine T King, Rosalie Viney, A. Simon Pickard, Donna Rowen, Neil K Aaronson, John E Brazier, David F Cella, Daniel SJ Costa, Peter M Fayers, Georg Kemmler, Helen McTaggart-Cowen, Rebecca Mercieca-Bebber, Stuart Peacock, Deborah Street, Tracey A Young, Richard Norman, on behalf of the MAUCa Consortium.

\*corresponding author

Prof Madeleine T King<sup>1,2</sup>

[Madeleine.king@sydney.edu.au](mailto:Madeleine.king@sydney.edu.au)

1. Psycho-oncology Co-operative Research Group, School of Psychology, Faculty of Science, University of Sydney, NSW, Australia

2. Central Clinical School, Sydney Medical School, Faculty of Medicine, University of Sydney, Sydney, NSW, Australia

## Online Resource 2

### Appendix 2: Mixed logit (Model 3)

|                                                  |        | Model 3           |                  |
|--------------------------------------------------|--------|-------------------|------------------|
| Mean                                             |        | Mean (Robust SE)  | SD (Robust SE)   |
| Duration                                         | Linear | 1.247 (0.038)***  | 0.636 (0.020)*** |
| Physical Functioning<br>x Duration <sup>a</sup>  | 2      | -0.137 (0.014)*** | 0.070 (0.024)*** |
|                                                  | 3      | -0.171 (0.015)*** | 0.076 (0.025)*** |
|                                                  | 4      | -0.230 (0.014)*** | 0.196 (0.015)*** |
| Role Functioning<br>x Duration <sup>a</sup>      | 2      | -0.047 (0.013)*** | 0.116 (0.027)*** |
|                                                  | 3      | -0.110 (0.013)*** | 0.071 (0.021)*** |
|                                                  | 4      | -0.148 (0.012)*** | 0.119 (0.018)*** |
| Social Functioning<br>x Duration <sup>a</sup>    | 2      | 0.008 (0.013)     | 0.115 (0.022)*** |
|                                                  | 3      | -0.090 (0.013)*** | 0.106 (0.022)*** |
|                                                  | 4      | -0.131 (0.012)*** | 0.142 (0.020)*** |
| Emotional Functioning<br>x Duration <sup>a</sup> | 2      | 0.001 (0.013)     | 0.083 (0.03)***  |
|                                                  | 3      | -0.083 (0.013)*** | 0.086 (0.032)*** |
|                                                  | 4      | -0.176 (0.013)*** | 0.190 (0.017)*** |
| Pain<br>x Duration <sup>a</sup>                  | 2      | -0.025 (0.013)*   | 0.155 (0.022)*** |
|                                                  | 3      | -0.125 (0.013)*** | 0.060 (0.021)*** |
|                                                  | 4      | -0.178 (0.013)*** | 0.197 (0.016)*** |
| Fatigue<br>x Duration <sup>a</sup>               | 2      | 0.003 (0.012)     | 0.130 (0.019)*** |
|                                                  | 3      | -0.019 (0.013)    | 0.073 (0.02)***  |
|                                                  | 4      | -0.049 (0.011)*** | 0.039 (0.046)    |
| Sleep<br>x Duration <sup>a</sup>                 | 2      | -0.002 (0.012)    | 0.178 (0.018)*** |
|                                                  | 3      | -0.024 (0.013)*   | 0.047 (0.037)    |
|                                                  | 4      | -0.027 (0.012)**  | 0.131 (0.019)*** |
| Appetite<br>x Duration <sup>a</sup>              | 2      | -0.004 (0.012)    | 0.101 (0.029)*** |
|                                                  | 3      | -0.053 (0.013)*** | 0.094 (0.026)*** |
|                                                  | 4      | -0.042 (0.012)*** | 0.104 (0.021)*** |
| Nausea<br>x Duration <sup>a</sup>                | 2      | -0.032 (0.012)*** | 0.109 (0.021)*** |
|                                                  | 3      | -0.074 (0.013)*** | 0.127 (0.019)*** |
|                                                  | 4      | -0.132 (0.012)*** | 0.127 (0.02)***  |
| Bowel Problems<br>x Duration <sup>a</sup>        | 2      | -0.023 (0.011)**  | 0.040 (0.044)    |
|                                                  | 3      | -0.082 (0.012)*** | 0.046 (0.031)    |
|                                                  | 4      | -0.114 (0.012)*** | 0.184 (0.019)*** |
| Log-likelihood                                   |        | -14310            |                  |
| Parameters                                       |        | 62                |                  |
| AIC                                              |        | 28743             |                  |
| BIC                                              |        | 29301             |                  |

a. The coefficient for each level of each QOL domain was estimated as the interaction of that level with duration.
